# Supplementary material for: Crowd Sourcing a New Paradigm for Interactome Driven Drug Target Identification in Mycobacterium tuberculosis
Source: PLoS One. 2012 Jul 11;7(7):e39808. doi: 10.1371/journal.pone.0039808 (PMC3395720; doi:10.1371/journal.pone.0039808)
Supplement: Table S3 — Central proteins predicted from analysis of the IPW interactome with details of interacting partners in PSI MITAB format. (XLSX) [file pone.0039808.s003.xlsx]

## Sheet: Sheet1
ID(s) interactor A	ID(s) interactor B	Alt. ID(s) interactor A	Alt. ID(s) interactor B	Alias(es) interactor A	Alias(es) interactor B	Interaction type(s)	Interaction detection method(s)	Confidence value(s)	Publication Identifier(s)	Publication 1st author(s)	Taxid interactor A	Taxid interactor B	Source database(s)	Interaction identifier(s)	Curator/Annotator
tuberculist:Rv0014c	tuberculist:Rv0014c	ncbigeneid:887072	ncbigeneid:887072	pknB	pknB	psi-mi:"MI:0914"(association)	psi-mi:"0013"	IDA	PMID: 17148687|PMID: 15978616|PMID: 18728196|PMID: 16436437|PMID: 15985609	Narayan A (2007)|Villarino A (2005)|Park ST (2008)|Dasgupta A (2006)|Kang CM (2005)	taxid:83332 (Mycobacterium tuberculosis)	taxid:83332 (Mycobacterium tuberculosis)	0	IPW-Rv0014c-Rv0014c	akanksha jain
tuberculist:Rv0014c	tuberculist:Rv0015c	ncbigeneid:887072	ncbigeneid:885953	pknB	pknA	psi-mi:"MI:0914"(association)	psi-mi:"0400"|psi-mi:"0013"	IPI|IDA	PMID: 17148687|PMID: 15978616|PMID: 18728196|PMID: 16436437|PMID: 15985609	Narayan A (2007)|Villarino A (2005)|Park ST (2008)|Dasgupta A (2006)|Kang CM (2005)	taxid:83332 (Mycobacterium tuberculosis)	taxid:83332 (Mycobacterium tuberculosis)	0	IPW-Rv0014c-Rv0015c	akanksha jain|vmevada102@gmail.com
tuberculist:Rv0014c	tuberculist:Rv0016c	ncbigeneid:887072	ncbigeneid:887078	pknB	pbpA	psi-mi:"MI:0914"(association)	psi-mi:"0255"	IEP	PMID: 17148687|PMID: 15978616|PMID: 18728196|PMID: 16436437|PMID: 15985609	Narayan A (2007)|Villarino A (2005)|Park ST (2008)|Dasgupta A (2006)|Kang CM (2005)	taxid:83332 (Mycobacterium tuberculosis)	taxid:83332 (Mycobacterium tuberculosis)	0	IPW-Rv0014c-Rv0016c	akanksha jain|vmevada102@gmail.com
tuberculist:Rv0014c	tuberculist:Rv1827	ncbigeneid:887072	ncbigeneid:885735	pknB	garA	psi-mi:"MI:0914"(association)	psi-mi:"0013"	IDA	PMID: 17148687|PMID: 15978616|PMID: 18728196|PMID: 16436437|PMID: 15985609	Narayan A (2007)|Villarino A (2005)|Park ST (2008)|Dasgupta A (2006)|Kang CM (2005)	taxid:83332 (Mycobacterium tuberculosis)	taxid:83332 (Mycobacterium tuberculosis)	0	IPW-Rv0014c-Rv1827	anupam mondal|madhulsbu@gmail.com
tuberculist:Rv0014c	tuberculist:Rv3221A	ncbigeneid:887072	ncbigeneid:3205091	pknB	rshA	psi-mi:"MI:0914"(association)	psi-mi:"0400"	IPI	PMID: 17148687|PMID: 15978616|PMID: 18728196|PMID: 16436437|PMID: 15985609	Narayan A (2007)|Villarino A (2005)|Park ST (2008)|Dasgupta A (2006)|Kang CM (2005)	taxid:83332 (Mycobacterium tuberculosis)	taxid:83332 (Mycobacterium tuberculosis)	0	IPW-Rv0014c-Rv3221A	akanksha jain
tuberculist:Rv0014c	tuberculist:Rv0015c	ncbigeneid:887072	ncbigeneid:885953	pknB	pknA	psi-mi:"MI:0914"(association)	psi-mi:"0255"	IEP	PMID: 15985609|PMID: 17148687|PMID: 18199749	Kang CM (2005)|Narayan A (2007)|Thakur M (2008)	taxid:83332 (Mycobacterium tuberculosis)	taxid:83332 (Mycobacterium tuberculosis)	0	IPW-Rv0015c-Rv0014c	Priyanka Priyadarshini|vmevada102@gmail.com
tuberculist:Rv0014c	tuberculist:Rv0016c	ncbigeneid:887072	ncbigeneid:887078	pknB	pbpA	psi-mi:"MI:0914"(association)	psi-mi:"0255"	IEP	PMID: 16436437	Dasgupta A (2006)	taxid:83332 (Mycobacterium tuberculosis)	taxid:83332 (Mycobacterium tuberculosis)	0	IPW-Rv0016c-Rv0014c	Priyanka Priyadarshini|vmevada102@gmail.com
tuberculist:Rv0014c	tuberculist:Rv0018c	ncbigeneid:887072	ncbigeneid:887070	pknB	pstP	psi-mi:"MI:0914"(association)	psi-mi:"0013"	IDA	PMID: 15530359|PMID: 12950916|PMID: 14575702	Pullen KE (2004)|Boitel B (2003)|Chopra P (2003)	taxid:83332 (Mycobacterium tuberculosis)	taxid:83332 (Mycobacterium tuberculosis)	0	IPW-Rv0018c-Rv0014c	Priyanka Priyadarshini|vmevada102@gmail.com
tuberculist:Rv0014c	tuberculist:Rv0019c	ncbigeneid:887072	ncbigeneid:887079	pknB	fhaB	psi-mi:"MI:0914"(association)	psi-mi:"0013"	IDA	PMID: 19826007	Gupta M (2009)	taxid:83332 (Mycobacterium tuberculosis)	taxid:83332 (Mycobacterium tuberculosis)	0	IPW-Rv0019c-Rv0014c	Priyanka Priyadarshini|vmevada102@gmail.com
tuberculist:Rv0014c	tuberculist:Rv0020c	ncbigeneid:887072	ncbigeneid:887067	pknB	fhaA	psi-mi:"MI:0914"(association)	psi-mi:"0400"	IEP	PMID: 15987910	Grundner C (2005)	taxid:83332 (Mycobacterium tuberculosis)	taxid:83332 (Mycobacterium tuberculosis)	0	IPW-Rv0020c-Rv0014c	Priyanka Priyadarshini|vmevada102@gmail.com
tuberculist:Rv0014c	tuberculist:Rv1018c	ncbigeneid:887072	ncbigeneid:886069	pknB	glmU	psi-mi:"MI:0914"(association)	psi-mi:"0013"	IDA	PMID: 18573680|PMID: 19121323	Zhang W (2008)|Parikh A (2009)	taxid:83332 (Mycobacterium tuberculosis)	taxid:83332 (Mycobacterium tuberculosis)	0	IPW-Rv1018c-Rv0014c	akanksha jain|priti.priety@gmail.com|ashwinigbhat@gmail.com
tuberculist:Rv0014c	tuberculist:Rv1222	ncbigeneid:887072	ncbigeneid:885196	pknB	rseA	psi-mi:"MI:0914"(association)	psi-mi:"0943"	IDA	PMID: 20025669|PMID: 18606740|PMID: 14761983	RseA (2010)|Dona V (2008)|Manganelli R (2004)	taxid:83332 (Mycobacterium tuberculosis)	taxid:83332 (Mycobacterium tuberculosis)	0	IPW-Rv1222-Rv0014c	Ashwini Bhat|harsharohiratruefriend@gmail.com
tuberculist:Rv0014c	tuberculist:Rv1422	ncbigeneid:887072	ncbigeneid:886670	pknB	Rv1422	psi-mi:"MI:0914"(association)	psi-mi:"0982"	RCA	PMID: 15985609	Kang CM (2005)	taxid:83332 (Mycobacterium tuberculosis)	taxid:83332 (Mycobacterium tuberculosis)	0	IPW-Rv1422-Rv0014c	Ashwini Bhat|shruti4rana@gmail.com
tuberculist:Rv0014c	tuberculist:Rv1436	ncbigeneid:887072	ncbigeneid:886632	pknB	gap	psi-mi:"MI:0914"(association)	psi-mi:"0013"	IDA	PMID: 10702355	Parker AE (2000)	taxid:83332 (Mycobacterium tuberculosis)	taxid:83332 (Mycobacterium tuberculosis)	0	IPW-Rv1436-Rv0014c	Anup Shah|yashabhasin@gmail.com
tuberculist:Rv0014c	tuberculist:Rv1827	ncbigeneid:887072	ncbigeneid:885735	pknB	garA	psi-mi:"MI:0914"(association)	psi-mi:"0013"	IDA	PMID: 19114043|PMID: 15978616	England P (2009)|Villarino A (2005)	taxid:83332 (Mycobacterium tuberculosis)	taxid:83332 (Mycobacterium tuberculosis)	0	IPW-Rv1827-Rv0014c	anupam mondal|madhulsbu@gmail.com
tuberculist:Rv0014c	tuberculist:Rv2145c	ncbigeneid:887072	ncbigeneid:888224	pknB	wag31|ag84	psi-mi:"MI:0914"(association)	psi-mi:"0400"	IMP	PMID: 18618175|PMID: 15985609|PMID: 19496931|PMID: 19932688|PMID: 7868268	Cao W (2008)|Kang CM (2005)|Mukherjee P (2009)|Hamasha K (2010)|Hermans PW (1995)	taxid:83332 (Mycobacterium tuberculosis)	taxid:83332 (Mycobacterium tuberculosis)	0	IPW-Rv2145c-Rv0014c	Anup Shah|harsharohiratruefriend@gmail.com
tuberculist:Rv0014c	tuberculist:Rv3223c	ncbigeneid:887072	ncbigeneid:888094	pknB	sigH	psi-mi:"MI:0914"(association)	psi-mi:"0255"	IEP|TAS	PMID: 19951358|PMID: 18728196|PMID: 11567012|PMID: 14617153	Sachdeva P (2010)|Park ST (2008)|Raman S (2001)|Song T (2003)	taxid:83332 (Mycobacterium tuberculosis)	taxid:83332 (Mycobacterium tuberculosis)	0	IPW-Rv3223c-Rv0014c	anupam mondal|sourish10@gmail.com
tuberculist:Rv0020c	tuberculist:Rv0014c	ncbigeneid:887067	ncbigeneid:887072	fhaA	pknB	psi-mi:"MI:0914"(association)	psi-mi:"0400"	IEP	PMID: 15987910	Grundner C (2005)	taxid:83332 (Mycobacterium tuberculosis)	taxid:83332 (Mycobacterium tuberculosis)	0	IPW-Rv0020c-Rv0014c	Priyanka Priyadarshini|vmevada102@gmail.com
tuberculist:Rv0020c	tuberculist:Rv0931c	ncbigeneid:887067	ncbigeneid:885607	fhaA	pknD	psi-mi:"MI:0914"(association)	psi-mi:"0400"	IEP	PMID: 15987910	Grundner C (2005)	taxid:83332 (Mycobacterium tuberculosis)	taxid:83332 (Mycobacterium tuberculosis)	0	IPW-Rv0020c-Rv0931c	Priyanka Priyadarshini|vmevada102@gmail.com
tuberculist:Rv0020c	tuberculist:Rv1743	ncbigeneid:887067	ncbigeneid:885284	fhaA	pknE	psi-mi:"MI:0914"(association)	psi-mi:"0400"	IEP	PMID: 15987910	Grundner C (2005)	taxid:83332 (Mycobacterium tuberculosis)	taxid:83332 (Mycobacterium tuberculosis)	0	IPW-Rv0020c-Rv1743	Priyanka Priyadarshini|vmevada102@gmail.com
tuberculist:Rv0020c	tuberculist:Rv1746	ncbigeneid:887067	ncbigeneid:885275	fhaA	pknF	psi-mi:"MI:0914"(association)	psi-mi:"0400"	IEP	PMID: 15987910	Grundner C (2005)	taxid:83332 (Mycobacterium tuberculosis)	taxid:83332 (Mycobacterium tuberculosis)	0	IPW-Rv0020c-Rv1746	Priyanka Priyadarshini|vmevada102@gmail.com
tuberculist:Rv0020c	tuberculist:Rv0931c	ncbigeneid:887067	ncbigeneid:885607	fhaA	pknD	psi-mi:"MI:0914"(association)	psi-mi:"0400"	IEP	PMID: 16879801|PMID: 15136047|PMID: 15987910|PMID: 17411339|PMID: 7768349|PMID: 3291115	Perez J (2006)|Good MC (2004)|Grundner C (2005)|Greenstein AE (2007)|Hanks SK (1995)|Hanks SK (1988)	taxid:83332 (Mycobacterium tuberculosis)	taxid:83332 (Mycobacterium tuberculosis)	0	IPW-Rv0931c-Rv0020c	Priyanka Priyadarshini|priyadarshinipriyanka2001@gmail.com
tuberculist:Rv0516c	tuberculist:Rv0931c	ncbigeneid:887324	ncbigeneid:885607	Rv0516c	pknD	psi-mi:"MI:0914"(association)	psi-mi:"0400"	IDA	PMID: 17485404|PMID: 16263329|PMID: 17411339	Dhandayuthapani S (2007)|Parida BK (2005)|Greenstein AE (2007)	taxid:83332 (Mycobacterium tuberculosis)	taxid:83332 (Mycobacterium tuberculosis)	0	IPW-Rv0516c-Rv0931c	Anup Shah|shahanup86@gmail.com
tuberculist:Rv0516c	tuberculist:Rv2638	ncbigeneid:887324	ncbigeneid:888156	Rv0516c	Rv2638	psi-mi:"MI:0914"(association)	psi-mi:"0255"	IDA	PMID: 17485404|PMID: 16263329|PMID: 17411339	Dhandayuthapani S (2007)|Parida BK (2005)|Greenstein AE (2007)	taxid:83332 (Mycobacterium tuberculosis)	taxid:83332 (Mycobacterium tuberculosis)	0	IPW-Rv0516c-Rv2638	anupam mondal|hibeeluck@gmail.com
tuberculist:Rv0516c	tuberculist:Rv3286c	ncbigeneid:887324	ncbigeneid:888727	Rv0516c	sigF	psi-mi:"MI:0914"(association)	psi-mi:"0045"	IPI	PMID: 17485404|PMID: 16263329|PMID: 17411339	Dhandayuthapani S (2007)|Parida BK (2005)|Greenstein AE (2007)	taxid:83332 (Mycobacterium tuberculosis)	taxid:83332 (Mycobacterium tuberculosis)	0	IPW-Rv0516c-Rv3286c	Anup Shah|yashabhasin@gmail.com
tuberculist:Rv0516c	tuberculist:Rv3287c	ncbigeneid:887324	ncbigeneid:887977	Rv0516c	rsbW|usfX	psi-mi:"MI:0914"(association)	psi-mi:"0255"	IDA	PMID: 17485404|PMID: 16263329|PMID: 17411339	Dhandayuthapani S (2007)|Parida BK (2005)|Greenstein AE (2007)	taxid:83332 (Mycobacterium tuberculosis)	taxid:83332 (Mycobacterium tuberculosis)	0	IPW-Rv0516c-Rv3287c	anupam mondal|hibeeluck@gmail.com
tuberculist:Rv0516c	tuberculist:Rv3687c	ncbigeneid:887324	ncbigeneid:885599	Rv0516c	rsfB	psi-mi:"MI:0914"(association)	psi-mi:"0255"	IDA	PMID: 17485404|PMID: 16263329|PMID: 17411339	Dhandayuthapani S (2007)|Parida BK (2005)|Greenstein AE (2007)	taxid:83332 (Mycobacterium tuberculosis)	taxid:83332 (Mycobacterium tuberculosis)	0	IPW-Rv0516c-Rv3687c	anupam mondal|hibeeluck@gmail.com
tuberculist:Rv0516c	tuberculist:Rv0931c	ncbigeneid:887324	ncbigeneid:885607	Rv0516c	pknD	psi-mi:"MI:0914"(association)	psi-mi:"0013"	IDA	PMID: 16879801|PMID: 15136047|PMID: 15987910|PMID: 17411339|PMID: 7768349|PMID: 3291115	Perez J (2006)|Good MC (2004)|Grundner C (2005)|Greenstein AE (2007)|Hanks SK (1995)|Hanks SK (1988)	taxid:83332 (Mycobacterium tuberculosis)	taxid:83332 (Mycobacterium tuberculosis)	0	IPW-Rv0931c-Rv0516c	Priyanka Priyadarshini|priyadarshinipriyanka2001@gmail.com
tuberculist:Rv0516c	tuberculist:Rv3286c	ncbigeneid:887324	ncbigeneid:888727	Rv0516c	sigF	psi-mi:"MI:0914"(association)	psi-mi:"0255"	IDA	PMID: 17485404|PMID: 12354223|PMID: 16263329|PMID: 17384187	Dhandayuthapani S (2007)|Beaucher J (2002)|Parida BK (2005)|Williams EP (2007)	taxid:83332 (Mycobacterium tuberculosis)	taxid:83332 (Mycobacterium tuberculosis)	0	IPW-Rv3286c-Rv0516c	anupam mondal|hibeeluck@gmail.com
tuberculist:Rv0757	tuberculist:Rv0440	ncbigeneid:888772	ncbigeneid:886354	phoP	groEL	psi-mi:"MI:0914"(association)	psi-mi:"0255"	IEP	PMID: 16326699|PMID: 18065544|PMID: 12730372|PMID: 18946503|PMID: 16573683|PMID: 18757548|PMID: 20421951|PMID: 18194076|PMID: 18835713|PMID: 17658950|PMID: 18065542	Gonzalo Asensio J (2006)|Sinha A (2008)|Sola-Landa A (2003)|Gonzalo-Asensio J (2008)|Walters SB (2006)|Gonzalo-Asensio J (2008)|Miller JL (2010)|Asensio JA (2008)|Ryndak M (2008)|Velmurugan K (2007)|Chesne-Seck ML (2008)	taxid:83332 (Mycobacterium tuberculosis)	taxid:83332 (Mycobacterium tuberculosis)	0	IPW-Rv0757-Rv0440	Anup Shah|singhpankaj2116@gmail.com
tuberculist:Rv0757	tuberculist:Rv0467	ncbigeneid:888772	ncbigeneid:886291	phoP	icl1	psi-mi:"MI:0914"(association)	psi-mi:"0255"	IEP	PMID: 16326699|PMID: 18065544|PMID: 12730372|PMID: 18946503|PMID: 16573683|PMID: 18757548|PMID: 20421951|PMID: 18194076|PMID: 18835713|PMID: 17658950|PMID: 18065542	Gonzalo Asensio J (2006)|Sinha A (2008)|Sola-Landa A (2003)|Gonzalo-Asensio J (2008)|Walters SB (2006)|Gonzalo-Asensio J (2008)|Miller JL (2010)|Asensio JA (2008)|Ryndak M (2008)|Velmurugan K (2007)|Chesne-Seck ML (2008)	taxid:83332 (Mycobacterium tuberculosis)	taxid:83332 (Mycobacterium tuberculosis)	0	IPW-Rv0757-Rv0467	Anup Shah|singhpankaj2116@gmail.com
tuberculist:Rv0757	tuberculist:Rv0758	ncbigeneid:888772	ncbigeneid:888775	phoP	phoR	psi-mi:"MI:0914"(association)	psi-mi:"0255"	IEP	PMID: 16326699|PMID: 18065544|PMID: 12730372|PMID: 18946503|PMID: 16573683|PMID: 18757548|PMID: 20421951|PMID: 18194076|PMID: 18835713|PMID: 17658950|PMID: 18065542	Gonzalo Asensio J (2006)|Sinha A (2008)|Sola-Landa A (2003)|Gonzalo-Asensio J (2008)|Walters SB (2006)|Gonzalo-Asensio J (2008)|Miller JL (2010)|Asensio JA (2008)|Ryndak M (2008)|Velmurugan K (2007)|Chesne-Seck ML (2008)	taxid:83332 (Mycobacterium tuberculosis)	taxid:83332 (Mycobacterium tuberculosis)	0	IPW-Rv0757-Rv0758	Anup Shah|singhpankaj2116@gmail.com
tuberculist:Rv0757	tuberculist:Rv2031c	ncbigeneid:888772	ncbigeneid:887579	phoP	hspX	psi-mi:"MI:0914"(association)	psi-mi:"0013"	IEP	PMID: 16326699|PMID: 18065544|PMID: 12730372|PMID: 18946503|PMID: 16573683|PMID: 18757548|PMID: 20421951|PMID: 18194076|PMID: 18835713|PMID: 17658950|PMID: 18065542	Gonzalo Asensio J (2006)|Sinha A (2008)|Sola-Landa A (2003)|Gonzalo-Asensio J (2008)|Walters SB (2006)|Gonzalo-Asensio J (2008)|Miller JL (2010)|Asensio JA (2008)|Ryndak M (2008)|Velmurugan K (2007)|Chesne-Seck ML (2008)	taxid:83332 (Mycobacterium tuberculosis)	taxid:83332 (Mycobacterium tuberculosis)	0	IPW-Rv0757-Rv2031c	Anup Shah|singhpankaj2116@gmail.com
tuberculist:Rv0757	tuberculist:Rv3151	ncbigeneid:888772	ncbigeneid:887540	phoP	nuoG	psi-mi:"MI:0914"(association)	psi-mi:"0400"	IMP	PMID: 16326699|PMID: 18065544|PMID: 12730372|PMID: 18946503|PMID: 16573683|PMID: 18757548|PMID: 20421951|PMID: 18194076|PMID: 18835713|PMID: 17658950|PMID: 18065542	Gonzalo Asensio J (2006)|Sinha A (2008)|Sola-Landa A (2003)|Gonzalo-Asensio J (2008)|Walters SB (2006)|Gonzalo-Asensio J (2008)|Miller JL (2010)|Asensio JA (2008)|Ryndak M (2008)|Velmurugan K (2007)|Chesne-Seck ML (2008)	taxid:83332 (Mycobacterium tuberculosis)	taxid:83332 (Mycobacterium tuberculosis)	0	IPW-Rv0757-Rv3151	Kausik Bhattacharyya|hibeeluck@gmail.com|jhum4u2006@gmail.com
tuberculist:Rv0757	tuberculist:Rv3881c	ncbigeneid:888772	ncbigeneid:886214	phoP	espB	psi-mi:"MI:0914"(association)	psi-mi:"0255"	IEP	PMID: 16326699|PMID: 18065544|PMID: 12730372|PMID: 18946503|PMID: 16573683|PMID: 18757548|PMID: 20421951|PMID: 18194076|PMID: 18835713|PMID: 17658950|PMID: 18065542	Gonzalo Asensio J (2006)|Sinha A (2008)|Sola-Landa A (2003)|Gonzalo-Asensio J (2008)|Walters SB (2006)|Gonzalo-Asensio J (2008)|Miller JL (2010)|Asensio JA (2008)|Ryndak M (2008)|Velmurugan K (2007)|Chesne-Seck ML (2008)	taxid:83332 (Mycobacterium tuberculosis)	taxid:83332 (Mycobacterium tuberculosis)	0	IPW-Rv0757-Rv3881c	Anup Shah|singhpankaj2116@gmail.com
tuberculist:Rv0757	tuberculist:Rv0758	ncbigeneid:888772	ncbigeneid:888775	phoP	phoR	psi-mi:"MI:0914"(association)	psi-mi:"0400"	IPI	PMID: 12730372|PMID: 18757548|PMID: 18065542|PMID: 16326699	Sola-Landa A (2003)|Gonzalo-Asensio J (2008)|Chesne-Seck ML (2008)|Gonzalo Asensio J (2006)	taxid:83332 (Mycobacterium tuberculosis)	taxid:83332 (Mycobacterium tuberculosis)	0	IPW-Rv0758-Rv0757	Anup Shah|yashabhasin@gmail.com
tuberculist:Rv0757	tuberculist:Rv0835	ncbigeneid:888772	ncbigeneid:885883	phoP	lpqQ	psi-mi:"MI:0914"(association)	psi-mi:"0255"	IMP	PMID: 16573683	Walters SB (2006)	taxid:83332 (Mycobacterium tuberculosis)	taxid:83332 (Mycobacterium tuberculosis)	0	IPW-Rv0835-Rv0757	anupam mondal|diponlove@hotmail.com
tuberculist:Rv0757	tuberculist:Rv1179c	ncbigeneid:888772	ncbigeneid:886083	phoP	Rv1179c	psi-mi:"MI:0914"(association)	psi-mi:"0255"	IEP	PMID: 16573683	Walters SB (2006)	taxid:83332 (Mycobacterium tuberculosis)	taxid:83332 (Mycobacterium tuberculosis)	0	IPW-Rv1179c-Rv0757	anupam mondal|ravirajsoni@gmail.com
tuberculist:Rv0757	tuberculist:Rv1518	ncbigeneid:888772	ncbigeneid:886451	phoP	Rv1518	psi-mi:"MI:0914"(association)	psi-mi:"0686"	0	PMID: 17122347|PMID: 16573683	Fujiwara N (2007)|Walters SB (2006)	taxid:83332 (Mycobacterium tuberculosis)	taxid:83332 (Mycobacterium tuberculosis)	0	IPW-Rv1518-Rv0757	akanksha jain|atulkatarkar@gmail.com
tuberculist:Rv0757	tuberculist:Rv2368c	ncbigeneid:888772	ncbigeneid:885998	phoP	phoH1	psi-mi:"MI:0914"(association)	psi-mi:"0400"	IPI	PMID: 17496102	Schaaf S (2007)	taxid:83332 (Mycobacterium tuberculosis)	taxid:83332 (Mycobacterium tuberculosis)	0	IPW-Rv2368c-Rv0757	anupam mondal|sourish10@gmail.com
tuberculist:Rv0757	tuberculist:Rv2396	ncbigeneid:888772	ncbigeneid:885517	phoP	PE_PGRS41	psi-mi:"MI:0914"(association)	psi-mi:"0400"	IPI	PMID: 15659067|PMID: 16573683|PMID: 16267303	Calamita H (2005)|Walters SB (2006)|Bai G (2005)	taxid:83332 (Mycobacterium tuberculosis)	taxid:83332 (Mycobacterium tuberculosis)	0	IPW-Rv2396-Rv0757	anupam mondal|sourish10@gmail.com
tuberculist:Rv0757	tuberculist:Rv2887	ncbigeneid:888772	ncbigeneid:888563	phoP	Rv2887	psi-mi:"MI:0914"(association)	psi-mi:"0255"	IEP	PMID: 18052041	Wang S (2007)	taxid:83332 (Mycobacterium tuberculosis)	taxid:83332 (Mycobacterium tuberculosis)	0	IPW-Rv2887-Rv0757	Anup Shah|shahanup86@gmail.com
tuberculist:Rv0757	tuberculist:Rv3151	ncbigeneid:888772	ncbigeneid:887540	phoP	nuoG	psi-mi:"MI:0914"(association)	psi-mi:"0400"	IMP	PMID: 786986|PMID: 20553485|PMID: 14741580|PMID: 20421951|PMID: 17906132|PMID: 18946503|PMID: 17658950|PMID: 17501996	Dancey GF (1976)|Meena LS (2010)|Friedrich T (2004)|Miller JL (2010)|Golby P (2007)|Gonzalo-Asensio J (2008)|Velmurugan K (2007)|Fu LM (2007)	taxid:83332 (Mycobacterium tuberculosis)	taxid:83332 (Mycobacterium tuberculosis)	0	IPW-Rv3151-Rv0757	Kausik Bhattacharyya|hibeeluck@gmail.com|jhum4u2006@gmail.com
tuberculist:Rv0757	tuberculist:Rv3426	ncbigeneid:888772	ncbigeneid:887622	phoP	PPE58	psi-mi:"MI:0914"(association)	psi-mi:"0255"	IEP	PMID: 16573683	Walters SB (2006)	taxid:83332 (Mycobacterium tuberculosis)	taxid:83332 (Mycobacterium tuberculosis)	0	IPW-Rv3426-Rv0757	akanksha jain|chirupolo@gmail.com
tuberculist:Rv0757	tuberculist:Rv3429	ncbigeneid:888772	ncbigeneid:887630	phoP	PPE59	psi-mi:"MI:0914"(association)	psi-mi:"0255"	IEP	PMID: 16573683|PMID: 18820012	Walters SB (2006)|Karboul A (2008)	taxid:83332 (Mycobacterium tuberculosis)	taxid:83332 (Mycobacterium tuberculosis)	0	IPW-Rv3429-Rv0757	akanksha jain
tuberculist:Rv0757	tuberculist:Rv3479	ncbigeneid:888772	ncbigeneid:888478	phoP	Rv3479	psi-mi:"MI:0914"(association)	psi-mi:"0255"	IEP	PMID: 18757548	Gonzalo-Asensio J (2008)	taxid:83332 (Mycobacterium tuberculosis)	taxid:83332 (Mycobacterium tuberculosis)	0	IPW-Rv3479-Rv0757	Anup Shah|raj252000@gmail.com
tuberculist:Rv0757	tuberculist:Rv3612c	ncbigeneid:888772	ncbigeneid:885381	phoP	Rv3612c	psi-mi:"MI:0914"(association)	psi-mi:"0686"	NAS	PMID: 16573683	Walters SB (2006)	taxid:83332 (Mycobacterium tuberculosis)	taxid:83332 (Mycobacterium tuberculosis)	0	IPW-Rv3612c-Rv0757	akanksha jain|darhngu@gmail.com
tuberculist:Rv0757	tuberculist:Rv3686c	ncbigeneid:888772	ncbigeneid:885306	phoP	Rv3686c	psi-mi:"MI:0914"(association)	psi-mi:"0686"	IEP	PMID: 18757548	Gonzalo-Asensio J (2008)	taxid:83332 (Mycobacterium tuberculosis)	taxid:83332 (Mycobacterium tuberculosis)	0	IPW-Rv3686c-Rv0757	akanksha jain|akankshajain.21@gmail.com
tuberculist:Rv0757	tuberculist:Rv3822	ncbigeneid:888772	ncbigeneid:886155	phoP	Rv3822	psi-mi:"MI:0914"(association)	psi-mi:"0255"	IEP	PMID: 16573683|PMID: 12711809	Walters SB (2006)|Adindla S (2003)	taxid:83332 (Mycobacterium tuberculosis)	taxid:83332 (Mycobacterium tuberculosis)	0	IPW-Rv3822-Rv0757	anupam mondal|sourish10@gmail.com
tuberculist:Rv0757	tuberculist:Rv3823c	ncbigeneid:888772	ncbigeneid:886145	phoP	mmpL8	psi-mi:"MI:0914"(association)	psi-mi:"0255"	IEP	PMID: 16573683|PMID: 12724526	Walters SB (2006)|Converse SE (2003)	taxid:83332 (Mycobacterium tuberculosis)	taxid:83332 (Mycobacterium tuberculosis)	0	IPW-Rv3823c-Rv0757	anupam mondal|sourish10@gamil.com
tuberculist:Rv0757	tuberculist:Rv3824c	ncbigeneid:888772	ncbigeneid:886156	phoP	papA1	psi-mi:"MI:0914"(association)	psi-mi:"0255"	IEP	PMID: 16573683|PMID: 17592143|PMID: 12711809	Walters SB (2006)|Kumar P (2007)|Adindla S (2003)	taxid:83332 (Mycobacterium tuberculosis)	taxid:83332 (Mycobacterium tuberculosis)	0	IPW-Rv3824c-Rv0757	anupam mondal|sourish10@gmail.com
tuberculist:Rv0757	tuberculist:Rv3825c	ncbigeneid:888772	ncbigeneid:886148	phoP	pks2	psi-mi:"MI:0914"(association)	psi-mi:"0255"	IEP	PMID: 12711809|PMID: 16573683|PMID: 12724526|PMID: 11278910	Adindla S (2003)|Walters SB (2006)|Converse SE (2003)|Sirakova TD (2001)	taxid:83332 (Mycobacterium tuberculosis)	taxid:83332 (Mycobacterium tuberculosis)	0	IPW-Rv3825c-Rv0757	anupam mondal|sourish10@gmail.com
tuberculist:Rv0931c	tuberculist:Rv0020c	ncbigeneid:885607	ncbigeneid:887067	pknD	fhaA	psi-mi:"MI:0914"(association)	psi-mi:"0400"	IEP	PMID: 15987910	Grundner C (2005)	taxid:83332 (Mycobacterium tuberculosis)	taxid:83332 (Mycobacterium tuberculosis)	0	IPW-Rv0020c-Rv0931c	Priyanka Priyadarshini|vmevada102@gmail.com
tuberculist:Rv0931c	tuberculist:Rv0516c	ncbigeneid:885607	ncbigeneid:887324	pknD	Rv0516c	psi-mi:"MI:0914"(association)	psi-mi:"0400"	IDA	PMID: 17485404|PMID: 16263329|PMID: 17411339	Dhandayuthapani S (2007)|Parida BK (2005)|Greenstein AE (2007)	taxid:83332 (Mycobacterium tuberculosis)	taxid:83332 (Mycobacterium tuberculosis)	0	IPW-Rv0516c-Rv0931c	Anup Shah|shahanup86@gmail.com
tuberculist:Rv0931c	tuberculist:Rv0020c	ncbigeneid:885607	ncbigeneid:887067	pknD	fhaA	psi-mi:"MI:0914"(association)	psi-mi:"0400"	IEP	PMID: 16879801|PMID: 15136047|PMID: 15987910|PMID: 17411339|PMID: 7768349|PMID: 3291115	Perez J (2006)|Good MC (2004)|Grundner C (2005)|Greenstein AE (2007)|Hanks SK (1995)|Hanks SK (1988)	taxid:83332 (Mycobacterium tuberculosis)	taxid:83332 (Mycobacterium tuberculosis)	0	IPW-Rv0931c-Rv0020c	Priyanka Priyadarshini|priyadarshinipriyanka2001@gmail.com
tuberculist:Rv0931c	tuberculist:Rv0516c	ncbigeneid:885607	ncbigeneid:887324	pknD	Rv0516c	psi-mi:"MI:0914"(association)	psi-mi:"0013"	IDA	PMID: 16879801|PMID: 15136047|PMID: 15987910|PMID: 17411339|PMID: 7768349|PMID: 3291115	Perez J (2006)|Good MC (2004)|Grundner C (2005)|Greenstein AE (2007)|Hanks SK (1995)|Hanks SK (1988)	taxid:83332 (Mycobacterium tuberculosis)	taxid:83332 (Mycobacterium tuberculosis)	0	IPW-Rv0931c-Rv0516c	Priyanka Priyadarshini|priyadarshinipriyanka2001@gmail.com
tuberculist:Rv0931c	tuberculist:Rv0931c	ncbigeneid:885607	ncbigeneid:885607	pknD	pknD	psi-mi:"MI:0914"(association)	psi-mi:"0686"	0	PMID: 16879801|PMID: 15136047|PMID: 15987910|PMID: 17411339|PMID: 7768349|PMID: 3291115	Perez J (2006)|Good MC (2004)|Grundner C (2005)|Greenstein AE (2007)|Hanks SK (1995)|Hanks SK (1988)	taxid:83332 (Mycobacterium tuberculosis)	taxid:83332 (Mycobacterium tuberculosis)	0	IPW-Rv0931c-Rv0931c	akanksha jain
tuberculist:Rv0931c	tuberculist:Rv1747	ncbigeneid:885607	ncbigeneid:885311	pknD	Rv1747	psi-mi:"MI:0914"(association)	psi-mi:"0400"	IEP	PMID: 16879801|PMID: 15136047|PMID: 15987910|PMID: 17411339|PMID: 7768349|PMID: 3291115	Perez J (2006)|Good MC (2004)|Grundner C (2005)|Greenstein AE (2007)|Hanks SK (1995)|Hanks SK (1988)	taxid:83332 (Mycobacterium tuberculosis)	taxid:83332 (Mycobacterium tuberculosis)	0	IPW-Rv0931c-Rv1747	Priyanka Priyadarshini|priyadarshinipriyanka2001@gmail.com
tuberculist:Rv0931c	tuberculist:Rv2942	ncbigeneid:885607	ncbigeneid:887548	pknD	mmpL7	psi-mi:"MI:0914"(association)	psi-mi:"0013"	IDA	PMID: 16879801|PMID: 15136047|PMID: 15987910|PMID: 17411339|PMID: 7768349|PMID: 3291115	Perez J (2006)|Good MC (2004)|Grundner C (2005)|Greenstein AE (2007)|Hanks SK (1995)|Hanks SK (1988)	taxid:83332 (Mycobacterium tuberculosis)	taxid:83332 (Mycobacterium tuberculosis)	0	IPW-Rv0931c-Rv2942	Priyanka Priyadarshini|priyadarshinipriyanka2001@gmail.com
tuberculist:Rv0981	tuberculist:Rv0982	ncbigeneid:885038	ncbigeneid:885062	mprA	mprB	psi-mi:"MI:0914"(association)	psi-mi:"0400"	IMP	PMID: 16513743|PMID: 14638785|PMID: 15601704	He H (2006)|Zahrt TC (2003)|He H (2005)	taxid:83332 (Mycobacterium tuberculosis)	taxid:83332 (Mycobacterium tuberculosis)	0	IPW-Rv0981-Rv0982	Anup Shah|kholia.trupti@gmail.com
tuberculist:Rv0981	tuberculist:Rv0983	ncbigeneid:885038	ncbigeneid:885382	mprA	pepD	psi-mi:"MI:0914"(association)	psi-mi:"0400"	IMP	PMID: 16513743|PMID: 14638785|PMID: 15601704	He H (2006)|Zahrt TC (2003)|He H (2005)	taxid:83332 (Mycobacterium tuberculosis)	taxid:83332 (Mycobacterium tuberculosis)	0	IPW-Rv0981-Rv0983	Anup Shah|ahal4789@gmail.com
tuberculist:Rv0981	tuberculist:Rv0982	ncbigeneid:885038	ncbigeneid:885062	mprA	mprB	psi-mi:"MI:0914"(association)	psi-mi:"0400"	IMP	PMID: 14638785|PMID: 16513743	Zahrt TC (2003)|He H (2006)	taxid:83332 (Mycobacterium tuberculosis)	taxid:83332 (Mycobacterium tuberculosis)	0	IPW-Rv0982-Rv0981	Anup Shah|ahal4789@gmail.com
tuberculist:Rv0981	tuberculist:Rv0983	ncbigeneid:885038	ncbigeneid:885382	mprA	pepD	psi-mi:"MI:0914"(association)	psi-mi:"0982"	IDA	PMID: 20061478|PMID: 15601704	White MJ (2010)|He H (2005)	taxid:83332 (Mycobacterium tuberculosis)	taxid:83332 (Mycobacterium tuberculosis)	0	IPW-Rv0983-Rv0981	Anup Shah|ahal4789@gmail.com
tuberculist:Rv0981	tuberculist:Rv1221	ncbigeneid:885038	ncbigeneid:888751	mprA	sigE	psi-mi:"MI:0914"(association)	psi-mi:"0982"	IDA	PMID: 16513743|PMID: 14638810|PMID: 18606740|PMID: 11489128|PMID: 9139909	He H (2006)|Ando M (2003)|Dona V (2008)|Manganelli R (2001)|Wu QL (1997)	taxid:83332 (Mycobacterium tuberculosis)	taxid:83332 (Mycobacterium tuberculosis)	0	IPW-Rv1221-Rv0981	Priyanka Priyadarshini|priyadarshinipriyanka2001@gmail.com
tuberculist:Rv0981	tuberculist:Rv1354c	ncbigeneid:885038	ncbigeneid:886829	mprA	Rv1354c	psi-mi:"MI:0914"(association)	psi-mi:"0045"	IPI	PMID: 19298676	Cui T (2009)	taxid:83332 (Mycobacterium tuberculosis)	taxid:83332 (Mycobacterium tuberculosis)	0	IPW-Rv1354c-Rv0981	akanksha jain
tuberculist:Rv0981	tuberculist:Rv2053c	ncbigeneid:885038	ncbigeneid:888768	mprA	Rv2053c	psi-mi:"MI:0914"(association)	psi-mi:"0255"	IEP	PMID: 16513743|PMID: 20061486	He H (2006)|Singh R (2010)	taxid:83332 (Mycobacterium tuberculosis)	taxid:83332 (Mycobacterium tuberculosis)	0	IPW-Rv2053c-Rv0981	Anup Shah|ravirajsoni@gmail.com
tuberculist:Rv0981	tuberculist:Rv2710	ncbigeneid:885038	ncbigeneid:888580	mprA	sigB	psi-mi:"MI:0914"(association)	psi-mi:"0982"	IDA	PMID: 11489128|PMID: 16513743	Manganelli R (2001)|He H (2006)	taxid:83332 (Mycobacterium tuberculosis)	taxid:83332 (Mycobacterium tuberculosis)	0	IPW-Rv2710-Rv0981	Priyanka Priyadarshini|priyadarshinipriyanka2001@gmail.com
tuberculist:Rv0981	tuberculist:Rv2984	ncbigeneid:885038	ncbigeneid:887482	mprA	ppk1|ppk1|ppk	psi-mi:"MI:0914"(association)	psi-mi:"0400"	IMP	PMID: 17630969|PMID: 18335046|PMID: 4337332|PMID: 10872445	Sureka K (2007)|Sureka K (2008)|Suzuki H (1972)|Kornberg A (1999)	taxid:83332 (Mycobacterium tuberculosis)	taxid:83332 (Mycobacterium tuberculosis)	0	IPW-Rv2984-Rv0981	Anup Shah|kholia.trupti@gmail.com
tuberculist:Rv1221	tuberculist:Rv2710	ncbigeneid:888751	ncbigeneid:888580	sigE	sigB	psi-mi:"MI:0914"(association)	psi-mi:"0255"	IEP	PMID: 16513743|PMID: 14638810|PMID: 18606740|PMID: 11489128|PMID: 9139909	He H (2006)|Ando M (2003)|Dona V (2008)|Manganelli R (2001)|Wu QL (1997)	taxid:83332 (Mycobacterium tuberculosis)	taxid:83332 (Mycobacterium tuberculosis)	0	IPW-Rv1221-Rv2710	akanksha jain|swetha.r@gmail.com
tuberculist:Rv1221	tuberculist:Rv0479c	ncbigeneid:888751	ncbigeneid:885535	sigE	Rv0479c	psi-mi:"MI:0914"(association)	psi-mi:"0255"	IEP	PMID: 17088352|PMID: 18657035	Agarwal N (2007)|Fontan PA (2008)	taxid:83332 (Mycobacterium tuberculosis)	taxid:83332 (Mycobacterium tuberculosis)	0	IPW-Rv0479c-Rv1221	anupam mondal|sourish10@gmail.com
tuberculist:Rv1221	tuberculist:Rv0678	ncbigeneid:888751	ncbigeneid:888235	sigE	Rv0678	psi-mi:"MI:0914"(association)	psi-mi:"0255"	NAS	PMID: 18851927|PMID: 11489128	Milano A (2009)|Manganelli R (2001)	taxid:83332 (Mycobacterium tuberculosis)	taxid:83332 (Mycobacterium tuberculosis)	0	IPW-Rv0678-Rv1221	Priyanka Priyadarshini|priti.priety@gmail.com|ashwinigbhat@gmail.com
tuberculist:Rv1221	tuberculist:Rv0789c	ncbigeneid:888751	ncbigeneid:885153	sigE	Rv0789c	psi-mi:"MI:0914"(association)	psi-mi:"0255"	IEP	PMID: 20061478|PMID: 11489128	White MJ (2010)|Manganelli R (2001)	taxid:83332 (Mycobacterium tuberculosis)	taxid:83332 (Mycobacterium tuberculosis)	0	IPW-Rv0789c-Rv1221	anupam mondal|sourish10@gmail.com
tuberculist:Rv1221	tuberculist:Rv0863	ncbigeneid:888751	ncbigeneid:885423	sigE	Rv0863	psi-mi:"MI:0914"(association)	psi-mi:"0255"	IEP	PMID: 11489128|PMID: 17993538	Manganelli R (2001)|Lee JH (2008)	taxid:83332 (Mycobacterium tuberculosis)	taxid:83332 (Mycobacterium tuberculosis)	0	IPW-Rv0863-Rv1221	akanksha jain|swetha.r@gmail.com
tuberculist:Rv1221	tuberculist:Rv1057	ncbigeneid:888751	ncbigeneid:887135	sigE	Rv1057	psi-mi:"MI:0914"(association)	psi-mi:"0045"	IEP	PMID: 16352831	Haydel SE (2006)	taxid:83332 (Mycobacterium tuberculosis)	taxid:83332 (Mycobacterium tuberculosis)	0	IPW-Rv1057-Rv1221	Ashwini Bhat|ashwinigbhat@gmail.com
tuberculist:Rv1221	tuberculist:Rv1072	ncbigeneid:888751	ncbigeneid:887114	sigE	Rv1072	psi-mi:"MI:0914"(association)	psi-mi:"0101"	NAS	PMID: 17471433	Jain SK (2007)	taxid:83332 (Mycobacterium tuberculosis)	taxid:83332 (Mycobacterium tuberculosis)	0	IPW-Rv1072-Rv1221	anupam mondal|sourish10@gmail.com
tuberculist:Rv1221	tuberculist:Rv1129c	ncbigeneid:888751	ncbigeneid:885963	sigE	Rv1129c	psi-mi:"MI:0914"(association)	psi-mi:"0045"	IMP	PMID: 17379732	Pang X (2007)	taxid:83332 (Mycobacterium tuberculosis)	taxid:83332 (Mycobacterium tuberculosis)	0	IPW-Rv1129c-Rv1221	Priti Vishnoi|ashwinigbhat@gmail.com
tuberculist:Rv1221	tuberculist:Rv1222	ncbigeneid:888751	ncbigeneid:885196	sigE	rseA	psi-mi:"MI:0914"(association)	psi-mi:"0400"	IPI	PMID: 20025669|PMID: 18606740|PMID: 14761983	RseA (2010)|Dona V (2008)|Manganelli R (2004)	taxid:83332 (Mycobacterium tuberculosis)	taxid:83332 (Mycobacterium tuberculosis)	0	IPW-Rv1222-Rv1221	Ashwini Bhat|deeps8891@yahoo.co.in
tuberculist:Rv1221	tuberculist:Rv1536	ncbigeneid:888751	ncbigeneid:886412	sigE	ileS	psi-mi:"MI:0914"(association)	psi-mi:"0255"	IEP	PMID: 13792726|PMID: 11489128	ALLEN EH (1960)|Manganelli R (2001)	taxid:83332 (Mycobacterium tuberculosis)	taxid:83332 (Mycobacterium tuberculosis)	0	IPW-Rv1536-Rv1221	Anup Shah|shahanup86@gmail.com
tuberculist:Rv1221	tuberculist:Rv1594	ncbigeneid:888751	ncbigeneid:886283	sigE	nadA	psi-mi:"MI:0914"(association)	psi-mi:"0255"	IEP	PMID: 9862811|PMID: 15937336|PMID: 11489128|PMID: 18803397	Sharma V (1998)|Sakuraba H (2005)|Manganelli R (2001)|Saunders AH (2008)	taxid:83332 (Mycobacterium tuberculosis)	taxid:83332 (Mycobacterium tuberculosis)	0	IPW-Rv1594-Rv1221	Anup Shah|shahanup86@gmail.com
tuberculist:Rv1221	tuberculist:Rv1595	ncbigeneid:888751	ncbigeneid:886285	sigE	nadB	psi-mi:"MI:0914"(association)	psi-mi:"0255"	IEP	PMID: 9862811|PMID: 11489128|PMID: 18490451	Sharma V (1998)|Manganelli R (2001)|Boshoff HI (2008)	taxid:83332 (Mycobacterium tuberculosis)	taxid:83332 (Mycobacterium tuberculosis)	0	IPW-Rv1595-Rv1221	Anup Shah|shahanup86@gmail.com
tuberculist:Rv1221	tuberculist:Rv1596	ncbigeneid:888751	ncbigeneid:886281	sigE	nadC	psi-mi:"MI:0914"(association)	psi-mi:"0255"	IEP	PMID: 14532352|PMID: 9862811|PMID: 11489128	Gu S (2003)|Sharma V (1998)|Manganelli R (2001)	taxid:83332 (Mycobacterium tuberculosis)	taxid:83332 (Mycobacterium tuberculosis)	0	IPW-Rv1596-Rv1221	Anup Shah|shahanup86@gmail.com
tuberculist:Rv1221	tuberculist:Rv1630	ncbigeneid:888751	ncbigeneid:885188	sigE	rpsA	psi-mi:"MI:0914"(association)	psi-mi:"0686"	IEP	PMID: 18657035	Fontan PA (2008)	taxid:83332 (Mycobacterium tuberculosis)	taxid:83332 (Mycobacterium tuberculosis)	0	IPW-Rv1630-Rv1221	harsha rohira|priti.priety@gmail.com|ashwinigbhat@gmail.com
tuberculist:Rv1221	tuberculist:Rv2050	ncbigeneid:888751	ncbigeneid:888598	sigE	Rv2050	psi-mi:"MI:0914"(association)	psi-mi:"0686"	TAS	PMID: 19332811|PMID: 11489128	Provvedi R (2009)|Manganelli R (2001)	taxid:83332 (Mycobacterium tuberculosis)	taxid:83332 (Mycobacterium tuberculosis)	0	IPW-Rv2050-Rv1221	Anup Shah|shahanup86@gmail.com
tuberculist:Rv1221	tuberculist:Rv2185c	ncbigeneid:888751	ncbigeneid:887239	sigE	TB16.3	psi-mi:"MI:0914"(association)	psi-mi:"0686"	0	PMID: 11489128	Manganelli R (2001)	taxid:83332 (Mycobacterium tuberculosis)	taxid:83332 (Mycobacterium tuberculosis)	0	IPW-Rv2185c-Rv1221	akanksha jain|vijayachitra@gmail.com
tuberculist:Rv1221	tuberculist:Rv2348c	ncbigeneid:888751	ncbigeneid:886006	sigE	Rv2348c	psi-mi:"MI:0914"(association)	psi-mi:"0255"	IEP	PMID: 11489128|PMID: 15375142	Manganelli R (2001)|Raman S (2004)	taxid:83332 (Mycobacterium tuberculosis)	taxid:83332 (Mycobacterium tuberculosis)	0	IPW-Rv2348c-Rv1221	akanksha jain|akankshajain.21@gmail.com
tuberculist:Rv1221	tuberculist:Rv2694c	ncbigeneid:888751	ncbigeneid:888911	sigE	Rv2694c	psi-mi:"MI:0914"(association)	psi-mi:"0400"	IMP	PMID: 18192397	Song T (2008)	taxid:83332 (Mycobacterium tuberculosis)	taxid:83332 (Mycobacterium tuberculosis)	0	IPW-Rv2694c-Rv1221	Anup Shah|anshula.arora1990@gmail.com
tuberculist:Rv1221	tuberculist:Rv2710	ncbigeneid:888751	ncbigeneid:888580	sigE	sigB	psi-mi:"MI:0914"(association)	psi-mi:"0255"	IEP	PMID: 11489128|PMID: 16513743	Manganelli R (2001)|He H (2006)	taxid:83332 (Mycobacterium tuberculosis)	taxid:83332 (Mycobacterium tuberculosis)	0	IPW-Rv2710-Rv1221	Priyanka Priyadarshini|priyadarshinipriyanka2001@gmail.com
tuberculist:Rv1221	tuberculist:Rv2743c	ncbigeneid:888751	ncbigeneid:887779	sigE	Rv2743c	psi-mi:"MI:0914"(association)	psi-mi:"0255"	IEP	PMID: 11489128|PMID: 19332811	Manganelli R (2001)|Provvedi R (2009)	taxid:83332 (Mycobacterium tuberculosis)	taxid:83332 (Mycobacterium tuberculosis)	0	IPW-Rv2743c-Rv1221	anupam mondal|balaganesh727@gmail.com
tuberculist:Rv1221	tuberculist:Rv2744c	ncbigeneid:888751	ncbigeneid:888304	sigE	Rv2744c	psi-mi:"MI:0914"(association)	psi-mi:"0255"	IEP	PMID: 18657035|PMID: 11489128|PMID: 19332811	Fontan PA (2008)|Manganelli R (2001)|Provvedi R (2009)	taxid:83332 (Mycobacterium tuberculosis)	taxid:83332 (Mycobacterium tuberculosis)	0	IPW-Rv2744c-Rv1221	Anup Shah|balaganesh727@gmail.com
tuberculist:Rv1221	tuberculist:Rv2745c	ncbigeneid:888751	ncbigeneid:888315	sigE	Rv2745c	psi-mi:"MI:0914"(association)	psi-mi:"0255"	IEP	PMID: 19376862|PMID: 18657035|PMID: 19332811|PMID: 11489128	Mehra S (2009)|Fontan PA (2008)|Provvedi R (2009)|Manganelli R (2001)	taxid:83332 (Mycobacterium tuberculosis)	taxid:83332 (Mycobacterium tuberculosis)	0	IPW-Rv2745c-Rv1221	anupam mondal|balaganesh727@gmail.com
tuberculist:Rv1221	tuberculist:Rv2984	ncbigeneid:888751	ncbigeneid:887482	sigE	ppk1|ppk1|ppk	psi-mi:"MI:0914"(association)	psi-mi:"0400"	IMP	PMID: 17630969|PMID: 18335046|PMID: 4337332|PMID: 10872445	Sureka K (2007)|Sureka K (2008)|Suzuki H (1972)|Kornberg A (1999)	taxid:83332 (Mycobacterium tuberculosis)	taxid:83332 (Mycobacterium tuberculosis)	0	IPW-Rv2984-Rv1221	Anup Shah|kholia.trupti@gmail.com
tuberculist:Rv1221	tuberculist:Rv3139	ncbigeneid:888751	ncbigeneid:887971	sigE	fadE24	psi-mi:"MI:0914"(association)	psi-mi:"0255"	IEP	PMID: 16127044|PMID: 19648248|PMID: 9535763|PMID: 20377898|PMID: 18375799|PMID: 18156607|PMID: 11489128	Danelishvili L (2005)|Abomoelak B (2009)|Mahadevan U (1998)|He Z (2010)|Golby P (2008)|Karakousis PC (2008)|Manganelli R (2001)	taxid:83332 (Mycobacterium tuberculosis)	taxid:83332 (Mycobacterium tuberculosis)	0	IPW-Rv3139-Rv1221	Kausik Bhattacharyya|hibeeluck@gmail.com|jhum4u2006@gmail.com
tuberculist:Rv1221	tuberculist:Rv3140	ncbigeneid:888751	ncbigeneid:887417	sigE	fadE23	psi-mi:"MI:0914"(association)	psi-mi:"0255"	IEP	PMID: 9535763|PMID: 12777483|PMID: 18156607|PMID: 16127044|PMID: 18657035	Mahadevan U (1998)|Parish T (2003)|Karakousis PC (2008)|Danelishvili L (2005)|Fontan PA (2008)	taxid:83332 (Mycobacterium tuberculosis)	taxid:83332 (Mycobacterium tuberculosis)	0	IPW-Rv3140-Rv1221	Kausik Bhattacharyya|hibeeluck@gmail.com|jhum4u2006@gmail.com
tuberculist:Rv1221	tuberculist:Rv3223c	ncbigeneid:888751	ncbigeneid:888094	sigE	sigH	psi-mi:"MI:0914"(association)	psi-mi:"0101"	NAS	PMID: 19951358|PMID: 18728196|PMID: 11567012|PMID: 14617153	Sachdeva P (2010)|Park ST (2008)|Raman S (2001)|Song T (2003)	taxid:83332 (Mycobacterium tuberculosis)	taxid:83332 (Mycobacterium tuberculosis)	0	IPW-Rv3223c-Rv1221	anupam mondal|sourish10@gmail.com
tuberculist:Rv1221	tuberculist:Rv3826	ncbigeneid:888751	ncbigeneid:886154	sigE	fadD23	psi-mi:"MI:0914"(association)	psi-mi:"0255"	IEP	PMID: 17768256	Lynett J (2007)	taxid:83332 (Mycobacterium tuberculosis)	taxid:83332 (Mycobacterium tuberculosis)	0	IPW-Rv3826-Rv1221	anupam mondal|priti.priety@gmail.com|ashwinigbhat@gmail.com
tuberculist:Rv1221	tuberculist:Rv0982	ncbigeneid:888751	ncbigeneid:885062	sigE	mprB	psi-mi:"MI:0914"(association)	psi-mi:"0982"	IDA	PMID: 16513743|PMID: 14638810|PMID: 18606740|PMID: 11489128|PMID: 9139909	He H (2006)|Ando M (2003)|Dona V (2008)|Manganelli R (2001)|Wu QL (1997)	taxid:83332 (Mycobacterium tuberculosis)	taxid:83332 (Mycobacterium tuberculosis)	0	IPW-Rv1221-Rv0982	Priyanka Priyadarshini|priyadarshinipriyanka2001@gmail.com
tuberculist:Rv1221	tuberculist:Rv0981	ncbigeneid:888751	ncbigeneid:885038	sigE	mprA	psi-mi:"MI:0914"(association)	psi-mi:"0982"	IDA	PMID: 16513743|PMID: 14638810|PMID: 18606740|PMID: 11489128|PMID: 9139909	He H (2006)|Ando M (2003)|Dona V (2008)|Manganelli R (2001)|Wu QL (1997)	taxid:83332 (Mycobacterium tuberculosis)	taxid:83332 (Mycobacterium tuberculosis)	0	IPW-Rv1221-Rv0981	Priyanka Priyadarshini|priyadarshinipriyanka2001@gmail.com
tuberculist:Rv2031c	tuberculist:Rv0757	ncbigeneid:887579	ncbigeneid:888772	hspX	phoP	psi-mi:"MI:0914"(association)	psi-mi:"0013"	IEP	PMID: 16326699|PMID: 18065544|PMID: 12730372|PMID: 18946503|PMID: 16573683|PMID: 18757548|PMID: 20421951|PMID: 18194076|PMID: 18835713|PMID: 17658950|PMID: 18065542	Gonzalo Asensio J (2006)|Sinha A (2008)|Sola-Landa A (2003)|Gonzalo-Asensio J (2008)|Walters SB (2006)|Gonzalo-Asensio J (2008)|Miller JL (2010)|Asensio JA (2008)|Ryndak M (2008)|Velmurugan K (2007)|Chesne-Seck ML (2008)	taxid:83332 (Mycobacterium tuberculosis)	taxid:83332 (Mycobacterium tuberculosis)	0	IPW-Rv0757-Rv2031c	Anup Shah|singhpankaj2116@gmail.com
tuberculist:Rv2031c	tuberculist:Rv1996	ncbigeneid:887579	ncbigeneid:888863	hspX	Rv1996	psi-mi:"MI:0914"(association)	psi-mi:"0255"	IEP	PMID: 11500455|PMID: 12933881|PMID: 20541977	Florczyk MA (2001)|Florczyk MA (2003)|Hingley-Wilson SM (2010)	taxid:83332 (Mycobacterium tuberculosis)	taxid:83332 (Mycobacterium tuberculosis)	0	IPW-Rv1996-Rv2031c	Priyanka Priyadarshini|priyadarshinipriyanka2001@gmail.com
tuberculist:Rv2031c	tuberculist:Rv1997	ncbigeneid:887579	ncbigeneid:888867	hspX	ctpF	psi-mi:"MI:0914"(association)	psi-mi:"0686"	RCA	PMID: 12933881|PMID: 15353332|PMID: 12925133	Florczyk MA (2003)|Agranoff D (2004)|Ohno H (2003)	taxid:83332 (Mycobacterium tuberculosis)	taxid:83332 (Mycobacterium tuberculosis)	0	IPW-Rv1997-Rv2031c	Priyanka Priyadarshini
tuberculist:Rv2031c	tuberculist:Rv2007c	ncbigeneid:887579	ncbigeneid:888887	hspX	fdxA	psi-mi:"MI:0914"(association)	psi-mi:"0255"	IEP	PMID: 17609369	Kumar A (2007)	taxid:83332 (Mycobacterium tuberculosis)	taxid:83332 (Mycobacterium tuberculosis)	0	IPW-Rv2007c-Rv2031c	Priti Vishnoi|akankshajain.21@gmail.com|prabhakarsmail@gmail.com
tuberculist:Rv2031c	tuberculist:Rv3133c	ncbigeneid:887579	ncbigeneid:888842	hspX	devR|dosR	psi-mi:"MI:0914"(association)	psi-mi:"0255"	IEP	PMID: 16467323|PMID: 19228590	Demissie A (2006)|Guo M (2009)	taxid:83332 (Mycobacterium tuberculosis)	taxid:83332 (Mycobacterium tuberculosis)	0	IPW-Rv2031c-Rv3133c	Priti Vishnoi|akankshajain.21@gmail.com|prabhakarsmail@gmail.com
tuberculist:Rv2031c	tuberculist:Rv2032	ncbigeneid:887579	ncbigeneid:887582	hspX	acg	psi-mi:"MI:0914"(association)	psi-mi:"0013"	IDA	PMID: 11854240	Purkayastha A (2002)	taxid:83332 (Mycobacterium tuberculosis)	taxid:83332 (Mycobacterium tuberculosis)	0	IPW-Rv2032-Rv2031c	Priti Vishnoi|priti.priety@gmail.com
tuberculist:Rv2031c	tuberculist:Rv2034	ncbigeneid:887579	ncbigeneid:887859	hspX	Rv2034	psi-mi:"MI:0914"(association)	psi-mi:"0045"	IDA	PMID: 19228590	Guo M (2009)	taxid:83332 (Mycobacterium tuberculosis)	taxid:83332 (Mycobacterium tuberculosis)	0	IPW-Rv2034-Rv2031c	SALMAN ZAHEER|priti.priety@gmail.com
tuberculist:Rv2031c	tuberculist:Rv2069	ncbigeneid:887579	ncbigeneid:888723	hspX	sigC	psi-mi:"MI:0914"(association)	psi-mi:"0255"	IEP	PMID: 16091848|PMID: 15049808	Lei J (2005)|Sun R (2004)	taxid:83332 (Mycobacterium tuberculosis)	taxid:83332 (Mycobacterium tuberculosis)	0	IPW-Rv2069-Rv2031c	Priyanka Priyadarshini|priti.priety@gmail.com|ashwinigbhat@gmail.com
tuberculist:Rv2069	tuberculist:Rv0093c	ncbigeneid:888723	ncbigeneid:886945	sigC	Rv0093c	psi-mi:"MI:0914"(association)	psi-mi:"0063"	TAS	PMID: 17145760	Thakur KG (2007)	taxid:83332 (Mycobacterium tuberculosis)	taxid:83332 (Mycobacterium tuberculosis)	0	IPW-Rv0093c-Rv2069	Ashwini Bhat|gaurisd10@gmail.com
tuberculist:Rv2069	tuberculist:Rv0095c	ncbigeneid:888723	ncbigeneid:886940	sigC	Rv0095c	psi-mi:"MI:0914"(association)	psi-mi:"0402"	IPI	PMID: 17158685	Rodrigue S (2007)	taxid:83332 (Mycobacterium tuberculosis)	taxid:83332 (Mycobacterium tuberculosis)	0	IPW-Rv0095c-Rv2069	Ashwini Bhat|gaurisd10@gmail.com
tuberculist:Rv2069	tuberculist:Rv0096	ncbigeneid:888723	ncbigeneid:886938	sigC	PPE1	psi-mi:"MI:0914"(association)	psi-mi:"0402"	IPI	PMID: 17942407|PMID: 12777483|PMID: 17524985|PMID: 17158685|PMID: 17028284	King-Scott J (2007)|Parish T (2003)|Wang F (2007)|Rodrigue S (2007)|Raman S (2006)	taxid:83332 (Mycobacterium tuberculosis)	taxid:83332 (Mycobacterium tuberculosis)	0	IPW-Rv0096-Rv2069	Ashwini Bhat|gaurisd10@gmail.com
tuberculist:Rv2069	tuberculist:Rv0108c	ncbigeneid:888723	ncbigeneid:886918	sigC	Rv0108c	psi-mi:"MI:0914"(association)	psi-mi:"0255"	IEP	PMID: 15049808	Sun R (2004)	taxid:83332 (Mycobacterium tuberculosis)	taxid:83332 (Mycobacterium tuberculosis)	0	IPW-Rv0108c-Rv2069	Anup Shah|prabhakarsmail@gmail.com
tuberculist:Rv2069	tuberculist:Rv0280	ncbigeneid:888723	ncbigeneid:886619	sigC	PPE3	psi-mi:"MI:0914"(association)	psi-mi:"0255"	IEP	PMID: 15049808|PMID: 17098899	Sun R (2004)|Maciag A (2007)	taxid:83332 (Mycobacterium tuberculosis)	taxid:83332 (Mycobacterium tuberculosis)	0	IPW-Rv0280-Rv2069	akanksha jain|gaat3s@gmail.com
tuberculist:Rv2069	tuberculist:Rv0331	ncbigeneid:888723	ncbigeneid:886534	sigC	Rv0331	psi-mi:"MI:0914"(association)	psi-mi:"0255"	IEP	PMID: 17158685	Rodrigue S (2007)	taxid:83332 (Mycobacterium tuberculosis)	taxid:83332 (Mycobacterium tuberculosis)	0	IPW-Rv0331-Rv2069	anupam mondal|sourish10@gmail.com
tuberculist:Rv2069	tuberculist:Rv0680c	ncbigeneid:888723	ncbigeneid:888229	sigC	Rv0680c	psi-mi:"MI:0914"(association)	psi-mi:"0400"|psi-mi:"0255"	IEP	PMID: 17252234	Matsuba T (2007)	taxid:83332 (Mycobacterium tuberculosis)	taxid:83332 (Mycobacterium tuberculosis)	0	IPW-Rv0680c-Rv2069	anupam mondal|sourish10@gmail.com
tuberculist:Rv2069	tuberculist:Rv0681	ncbigeneid:888723	ncbigeneid:888239	sigC	Rv0681	psi-mi:"MI:0914"(association)	psi-mi:"0402"	IPI	PMID: 17286964|PMID: 17158685	Zheng X (2007)|Rodrigue S (2007)	taxid:83332 (Mycobacterium tuberculosis)	taxid:83332 (Mycobacterium tuberculosis)	0	IPW-Rv0681-Rv2069	anupam mondal|sudhakar_dipu@rediffmail.com
tuberculist:Rv2069	tuberculist:Rv0723	ncbigeneid:888723	ncbigeneid:888531	sigC	rplO	psi-mi:"MI:0914"(association)	psi-mi:"0402"	IPI	PMID: 3125705|PMID: 17158685	Medow I (1987)|Rodrigue S (2007)	taxid:83332 (Mycobacterium tuberculosis)	taxid:83332 (Mycobacterium tuberculosis)	0	IPW-Rv0723-Rv2069	Anup Shah|anshula.arora1990@gmail.com
tuberculist:Rv2069	tuberculist:Rv1523	ncbigeneid:888723	ncbigeneid:886489	sigC	Rv1523	psi-mi:"MI:0914"(association)	psi-mi:"0255"	IEP	PMID: 1936951|PMID: 15466031|PMID: 15049808	Orpiszewski J (1991)|Jeevarajah D (2004)|Sun R (2004)	taxid:83332 (Mycobacterium tuberculosis)	taxid:83332 (Mycobacterium tuberculosis)	0	IPW-Rv1523-Rv2069	Anup Shah|shahanup86@gmail.com
tuberculist:Rv2069	tuberculist:Rv0129c	ncbigeneid:888723	ncbigeneid:886885	sigC	fbpC|mpt45|Ag85C	psi-mi:"MI:0914"(association)	psi-mi:"0255"	IEP	PMID: 16091848|PMID: 15049808	Lei J (2005)|Sun R (2004)	taxid:83332 (Mycobacterium tuberculosis)	taxid:83332 (Mycobacterium tuberculosis)	0	IPW-Rv2069-Rv0129c	Priyanka Priyadarshini|priti.priety@gmail.com|ashwinigbhat@gmail.com
tuberculist:Rv2069	tuberculist:Rv0490	ncbigeneid:888723	ncbigeneid:887185	sigC	senX3	psi-mi:"MI:0914"(association)	psi-mi:"0255"	IEP	PMID: 16091848|PMID: 15049808	Lei J (2005)|Sun R (2004)	taxid:83332 (Mycobacterium tuberculosis)	taxid:83332 (Mycobacterium tuberculosis)	0	IPW-Rv2069-Rv0490	Priyanka Priyadarshini|priti.priety@gmail.com|ashwinigbhat@gmail.com
tuberculist:Rv2069	tuberculist:Rv2031c	ncbigeneid:888723	ncbigeneid:887579	sigC	hspX	psi-mi:"MI:0914"(association)	psi-mi:"0255"	IEP	PMID: 16091848|PMID: 15049808	Lei J (2005)|Sun R (2004)	taxid:83332 (Mycobacterium tuberculosis)	taxid:83332 (Mycobacterium tuberculosis)	0	IPW-Rv2069-Rv2031c	Priyanka Priyadarshini|priti.priety@gmail.com|ashwinigbhat@gmail.com
tuberculist:Rv2069	tuberculist:Rv2234	ncbigeneid:888723	ncbigeneid:887373	sigC	ptpA	psi-mi:"MI:0914"(association)	psi-mi:"0013"	IDA	PMID: 16091848|PMID: 15049808	Lei J (2005)|Sun R (2004)	taxid:83332 (Mycobacterium tuberculosis)	taxid:83332 (Mycobacterium tuberculosis)	0	IPW-Rv2069-Rv2234	Priyanka Priyadarshini|priti.priety@gmail.com|ashwinigbhat@gmail.com
tuberculist:Rv2069	tuberculist:Rv3246c	ncbigeneid:888723	ncbigeneid:888743	sigC	mtrA	psi-mi:"MI:0914"(association)	psi-mi:"0255"	IEP	PMID: 16091848|PMID: 15049808	Lei J (2005)|Sun R (2004)	taxid:83332 (Mycobacterium tuberculosis)	taxid:83332 (Mycobacterium tuberculosis)	0	IPW-Rv2069-Rv3246c	Priyanka Priyadarshini|priti.priety@gmail.com|ashwinigbhat@gmail.com
tuberculist:Rv2069	tuberculist:Rv2387	ncbigeneid:888723	ncbigeneid:885302	sigC	Rv2387	psi-mi:"MI:0914"(association)	psi-mi:"0400"	IPI	PMID: 17158685	Rodrigue S (2007)	taxid:83332 (Mycobacterium tuberculosis)	taxid:83332 (Mycobacterium tuberculosis)	0	IPW-Rv2387-Rv2069	anupam mondal|sourish10@gmail.com
tuberculist:Rv2069	tuberculist:Rv3064c	ncbigeneid:888723	ncbigeneid:888879	sigC	Rv3064c	psi-mi:"MI:0914"(association)	psi-mi:"0255"	NAS	PMID: 15049808	Sun R (2004)	taxid:83332 (Mycobacterium tuberculosis)	taxid:83332 (Mycobacterium tuberculosis)	0	IPW-Rv3064c-Rv2069	Priyanka Priyadarshini|priydarshinipriyanka2001@gmail.com
tuberculist:Rv2069	tuberculist:Rv3161c	ncbigeneid:888723	ncbigeneid:888800	sigC	Rv3161c	psi-mi:"MI:0914"(association)	psi-mi:"0255"	IEP	PMID: 20386700|PMID: 15049808	Dutta NK (2010)|Sun R (2004)	taxid:83332 (Mycobacterium tuberculosis)	taxid:83332 (Mycobacterium tuberculosis)	0	IPW-Rv3161c-Rv2069	Anup Shah|shahanup86@gmail.com
tuberculist:Rv2069	tuberculist:Rv3246c	ncbigeneid:888723	ncbigeneid:888743	sigC	mtrA	psi-mi:"MI:0914"(association)	psi-mi:"0255"	IEP	PMID: 10851001|PMID: 11349098|PMID: 15049808|PMID: 16436697	Zahrt TC (2000)|Singh KK (2001)|Sun R (2004)|Cangelosi GA (2006)	taxid:83332 (Mycobacterium tuberculosis)	taxid:83332 (Mycobacterium tuberculosis)	0	IPW-Rv3246c-Rv2069	anupam mondal|sourish10@gmail.com
tuberculist:Rv2069	tuberculist:Rv3482c	ncbigeneid:888723	ncbigeneid:888480	sigC	Rv3482c	psi-mi:"MI:0914"(association)	psi-mi:"0255"	IEP	PMID: 15952732|PMID: 17158685	Xiong Y (2005)|Rodrigue S (2007)	taxid:83332 (Mycobacterium tuberculosis)	taxid:83332 (Mycobacterium tuberculosis)	0	IPW-Rv3482c-Rv2069	anupam mondal|sourish10@gmail.com
tuberculist:Rv2069	tuberculist:Rv3843c	ncbigeneid:888723	ncbigeneid:886178	sigC	Rv3843c	psi-mi:"MI:0914"(association)	psi-mi:"0255"|psi-mi:"0400"	IEP|IPI	PMID: 16267303|PMID: 15049808	Bai G (2005)|Sun R (2004)	taxid:83332 (Mycobacterium tuberculosis)	taxid:83332 (Mycobacterium tuberculosis)	0	IPW-Rv3843c-Rv2069	anupam mondal|priti.priety@gmail.com|ashwinigbhat@gmail.com
tuberculist:Rv2710	tuberculist:Rv0463	ncbigeneid:888580	ncbigeneid:886299	sigB	Rv0463	psi-mi:"MI:0914"(association)	psi-mi:"0255"	IEP			taxid:83332 (Mycobacterium tuberculosis)	taxid:83332 (Mycobacterium tuberculosis)	0	IPW-Rv0463-Rv2710	anupam mondal|sourish10@gmail.com
tuberculist:Rv2710	tuberculist:Rv0563	ncbigeneid:888580	ncbigeneid:887649	sigB	htpX	psi-mi:"MI:0914"(association)	psi-mi:"0255"	IEP	PMID: 20386700	Dutta NK (2010)	taxid:83332 (Mycobacterium tuberculosis)	taxid:83332 (Mycobacterium tuberculosis)	0	IPW-Rv0563-Rv2710	akanksha jain|sourish10@gmail.com
tuberculist:Rv2710	tuberculist:Rv0863	ncbigeneid:888580	ncbigeneid:885423	sigB	Rv0863	psi-mi:"MI:0914"(association)	psi-mi:"0255"	IEP	PMID: 11489128|PMID: 17993538	Manganelli R (2001)|Lee JH (2008)	taxid:83332 (Mycobacterium tuberculosis)	taxid:83332 (Mycobacterium tuberculosis)	0	IPW-Rv0863-Rv2710	akanksha jain|swetha.r@gmail.com
tuberculist:Rv2710	tuberculist:Rv1046c	ncbigeneid:888580	ncbigeneid:886071	sigB	Rv1046c	psi-mi:"MI:0914"(association)	psi-mi:"0255"	IEP	PMID: 17993538	Lee JH (2008)	taxid:83332 (Mycobacterium tuberculosis)	taxid:83332 (Mycobacterium tuberculosis)	0	IPW-Rv1046c-Rv2710	akanksha jain|raj252000@yahoo.com
tuberculist:Rv2710	tuberculist:Rv1221	ncbigeneid:888580	ncbigeneid:888751	sigB	sigE	psi-mi:"MI:0914"(association)	psi-mi:"0255"	IEP	PMID: 16513743|PMID: 14638810|PMID: 18606740|PMID: 11489128|PMID: 9139909	He H (2006)|Ando M (2003)|Dona V (2008)|Manganelli R (2001)|Wu QL (1997)	taxid:83332 (Mycobacterium tuberculosis)	taxid:83332 (Mycobacterium tuberculosis)	0	IPW-Rv1221-Rv2710	akanksha jain|swetha.r@gmail.com
tuberculist:Rv2710	tuberculist:Rv1361c	ncbigeneid:888580	ncbigeneid:886819	sigB	PPE19	psi-mi:"MI:0914"(association)	psi-mi:"0255"	IEP	PMID: 19592585	Fontan PA (2009)	taxid:83332 (Mycobacterium tuberculosis)	taxid:83332 (Mycobacterium tuberculosis)	0	IPW-Rv1361c-Rv2710	akanksha jain|swetha.r@gmail.com
tuberculist:Rv2710	tuberculist:Rv1400c	ncbigeneid:888580	ncbigeneid:886728	sigB	lipI	psi-mi:"MI:0914"(association)	psi-mi:"0255"	NAS	PMID: 16354661|PMID: 17993538	Deb C (2006)|Lee JH (2008)	taxid:83332 (Mycobacterium tuberculosis)	taxid:83332 (Mycobacterium tuberculosis)	0	IPW-Rv1400c-Rv2710	Priyanka Priyadarshini|priyadarshinipriyanka2001@gmail.com
tuberculist:Rv2710	tuberculist:Rv1429	ncbigeneid:888580	ncbigeneid:886658	sigB	Rv1429	psi-mi:"MI:0914"(association)	psi-mi:"0255"	IEP	PMID: 17993538|PMID: 1508047	Lee JH (2008)|Geistlich M (1992)	taxid:83332 (Mycobacterium tuberculosis)	taxid:83332 (Mycobacterium tuberculosis)	0	IPW-Rv1429-Rv2710	anupam mondal|sourish10@gmail.com
tuberculist:Rv2710	tuberculist:Rv2111c	ncbigeneid:888580	ncbigeneid:888788	sigB	pup	psi-mi:"MI:0914"(association)	psi-mi:"0255"	NAS	PMID: 17993538|PMID: 18832610|PMID: 20025664|PMID: 19448618|PMID: 20066036	Lee JH (2008)|Pearce MJ (2008)|Imkamp F (2010)|Striebel F (2009)|Festa RA (2010)	taxid:83332 (Mycobacterium tuberculosis)	taxid:83332 (Mycobacterium tuberculosis)	0	IPW-Rv2111c-Rv2710	Priyanka Priyadarshini|priyadarshinipriyanka2001@gmail.com
tuberculist:Rv2710	tuberculist:Rv2132	ncbigeneid:888580	ncbigeneid:887827	sigB	Rv2132	psi-mi:"MI:0914"(association)	psi-mi:"0255"	IEP	PMID: 9857196|PMID: 17993538	Gomis-Ruth FX (1998)|Lee JH (2008)	taxid:83332 (Mycobacterium tuberculosis)	taxid:83332 (Mycobacterium tuberculosis)	0	IPW-Rv2132-Rv2710	Anup Shah|shahanup86@gmail.com
tuberculist:Rv2710	tuberculist:Rv2287	ncbigeneid:888580	ncbigeneid:887570	sigB	yjce	psi-mi:"MI:0914"(association)	psi-mi:"0255"	IEP	PMID: 17993538	Lee JH (2008)	taxid:83332 (Mycobacterium tuberculosis)	taxid:83332 (Mycobacterium tuberculosis)	0	IPW-Rv2287-Rv2710	anupam mondal|priti.priety@gmail.com
tuberculist:Rv2710	tuberculist:Rv2446c	ncbigeneid:888580	ncbigeneid:885916	sigB	Rv2446c	psi-mi:"MI:0914"(association)	psi-mi:"0255"	IEP	PMID: 15608119|PMID: 17993538	Korepanova A (2005)|Lee JH (2008)	taxid:83332 (Mycobacterium tuberculosis)	taxid:83332 (Mycobacterium tuberculosis)	0	IPW-Rv2446c-Rv2710	Anup Shah|singhpankaj2116@gmail.com
tuberculist:Rv2710	tuberculist:Rv2490c	ncbigeneid:888580	ncbigeneid:887941	sigB	PE_PGRS43	psi-mi:"MI:0914"(association)	psi-mi:"0255"	IEP	PMID: 17993538	Lee JH (2008)	taxid:83332 (Mycobacterium tuberculosis)	taxid:83332 (Mycobacterium tuberculosis)	0	IPW-Rv2490c-Rv2710	anupam mondal|sourish10@gmail.com
tuberculist:Rv2710	tuberculist:Rv2590	ncbigeneid:888580	ncbigeneid:888574	sigB	FadD9	psi-mi:"MI:0914"(association)	psi-mi:"0045"	IPI	PMID: 18946503|PMID: 11489128|PMID: 15525680|PMID: 19228590	Gonzalo-Asensio J (2008)|Manganelli R (2001)|Mawuenyega KG (2005)|Guo M (2009)	taxid:83332 (Mycobacterium tuberculosis)	taxid:83332 (Mycobacterium tuberculosis)	0	IPW-Rv2590-Rv2710	Kausik Bhattacharyya|hibeeluck@gmail.com
tuberculist:Rv2710	tuberculist:Rv2612c	ncbigeneid:888580	ncbigeneid:888209	sigB	pgsA1	psi-mi:"MI:0914"(association)	psi-mi:"0255"	IEP	PMID: 12122024|PMID: 12005437|PMID: 9989274|PMID: 17993538	Cooper HN (2002)|Norman RA (2002)|Salman M (1999)|Lee JH (2008)	taxid:83332 (Mycobacterium tuberculosis)	taxid:83332 (Mycobacterium tuberculosis)	0	IPW-Rv2612c-Rv2710	Anup Shah|shahanup86@gmail.com
tuberculist:Rv2710	tuberculist:Rv0981	ncbigeneid:888580	ncbigeneid:885038	sigB	mprA	psi-mi:"MI:0914"(association)	psi-mi:"0982"	IDA	PMID: 11489128|PMID: 16513743	Manganelli R (2001)|He H (2006)	taxid:83332 (Mycobacterium tuberculosis)	taxid:83332 (Mycobacterium tuberculosis)	0	IPW-Rv2710-Rv0981	Priyanka Priyadarshini|priyadarshinipriyanka2001@gmail.com
tuberculist:Rv2710	tuberculist:Rv0982	ncbigeneid:888580	ncbigeneid:885062	sigB	mprB	psi-mi:"MI:0914"(association)	psi-mi:"0982"	IDA	PMID: 11489128|PMID: 16513743	Manganelli R (2001)|He H (2006)	taxid:83332 (Mycobacterium tuberculosis)	taxid:83332 (Mycobacterium tuberculosis)	0	IPW-Rv2710-Rv0982	Priyanka Priyadarshini|priyadarshinipriyanka2001@gmail.com
tuberculist:Rv2710	tuberculist:Rv1221	ncbigeneid:888580	ncbigeneid:888751	sigB	sigE	psi-mi:"MI:0914"(association)	psi-mi:"0255"	IEP	PMID: 11489128|PMID: 16513743	Manganelli R (2001)|He H (2006)	taxid:83332 (Mycobacterium tuberculosis)	taxid:83332 (Mycobacterium tuberculosis)	0	IPW-Rv2710-Rv1221	Priyanka Priyadarshini|priyadarshinipriyanka2001@gmail.com
tuberculist:Rv2710	tuberculist:Rv2850c	ncbigeneid:888580	ncbigeneid:887364	sigB	Rv2850c	psi-mi:"MI:0914"(association)	psi-mi:"0255"	IEP	PMID: 17993538	Lee JH (2008)	taxid:83332 (Mycobacterium tuberculosis)	taxid:83332 (Mycobacterium tuberculosis)	0	IPW-Rv2850c-Rv2710	Anup Shah|yashabhasin@gmail.com
tuberculist:Rv2710	tuberculist:Rv2904c	ncbigeneid:888580	ncbigeneid:887356	sigB	rplS	psi-mi:"MI:0914"(association)	psi-mi:"0400"	IEP	PMID: 17993538	Lee JH (2008)	taxid:83332 (Mycobacterium tuberculosis)	taxid:83332 (Mycobacterium tuberculosis)	0	IPW-Rv2904c-Rv2710	Anup Shah|shahanup86@gmail.com
tuberculist:Rv2710	tuberculist:Rv2970c	ncbigeneid:888580	ncbigeneid:887194	sigB	lipN	psi-mi:"MI:0914"(association)	psi-mi:"0255"	IEP	PMID: 17993538	Lee JH (2008)	taxid:83332 (Mycobacterium tuberculosis)	taxid:83332 (Mycobacterium tuberculosis)	0	IPW-Rv2970c-Rv2710	anupam mondal|sourish10@gmail.com
tuberculist:Rv2710	tuberculist:Rv2974c	ncbigeneid:888580	ncbigeneid:887383	sigB	Rv2974c	psi-mi:"MI:0914"(association)	psi-mi:"0255"	IEP	PMID: 17993538	Lee JH (2008)	taxid:83332 (Mycobacterium tuberculosis)	taxid:83332 (Mycobacterium tuberculosis)	0	IPW-Rv2974c-Rv2710	anupam mondal|sourish10@gmail.com
tuberculist:Rv2710	tuberculist:Rv2978c	ncbigeneid:888580	ncbigeneid:887390	sigB	Rv2978c	psi-mi:"MI:0914"(association)	psi-mi:"0255"	IEP	PMID: 17993538	Lee JH (2008)	taxid:83332 (Mycobacterium tuberculosis)	taxid:83332 (Mycobacterium tuberculosis)	0	IPW-Rv2978c-Rv2710	Anup Shah|ashwinigbhat@gmail.com
tuberculist:Rv2710	tuberculist:Rv3223c	ncbigeneid:888580	ncbigeneid:888094	sigB	sigH	psi-mi:"MI:0914"(association)	psi-mi:"0255"	IEP|TAS	PMID: 19951358|PMID: 18728196|PMID: 11567012|PMID: 14617153	Sachdeva P (2010)|Park ST (2008)|Raman S (2001)|Song T (2003)	taxid:83332 (Mycobacterium tuberculosis)	taxid:83332 (Mycobacterium tuberculosis)	0	IPW-Rv3223c-Rv2710	anupam mondal|sourish10@gmail.com
tuberculist:Rv2710	tuberculist:Rv3508	ncbigeneid:888580	ncbigeneid:888270	sigB	PE-PGRS54	psi-mi:"MI:0914"(association)	psi-mi:"0255"	IEP	PMID: 15207495|PMID: 18584054	Voskuil MI (2004)|Zheng H (2008)	taxid:83332 (Mycobacterium tuberculosis)	taxid:83332 (Mycobacterium tuberculosis)	0	IPW-Rv3508-Rv2710	akanksha jain|darhngu@gmail.com
tuberculist:Rv3151	tuberculist:Rv0757	ncbigeneid:887540	ncbigeneid:888772	nuoG	phoP	psi-mi:"MI:0914"(association)	psi-mi:"0400"	IMP	PMID: 16326699|PMID: 18065544|PMID: 12730372|PMID: 18946503|PMID: 16573683|PMID: 18757548|PMID: 20421951|PMID: 18194076|PMID: 18835713|PMID: 17658950|PMID: 18065542	Gonzalo Asensio J (2006)|Sinha A (2008)|Sola-Landa A (2003)|Gonzalo-Asensio J (2008)|Walters SB (2006)|Gonzalo-Asensio J (2008)|Miller JL (2010)|Asensio JA (2008)|Ryndak M (2008)|Velmurugan K (2007)|Chesne-Seck ML (2008)	taxid:83332 (Mycobacterium tuberculosis)	taxid:83332 (Mycobacterium tuberculosis)	0	IPW-Rv0757-Rv3151	Kausik Bhattacharyya|hibeeluck@gmail.com|jhum4u2006@gmail.com
tuberculist:Rv3151	tuberculist:Rv3145	ncbigeneid:887540	ncbigeneid:887397	nuoG	nuoA	psi-mi:"MI:0914"(association)	psi-mi:"0686"	ISO	PMID: 20553485|PMID: 17906132|PMID: 17501996|PMID: 786986|PMID: 14741580	Meena LS (2010)|Golby P (2007)|Fu LM (2007)|Dancey GF (1976)|Friedrich T (2004)	taxid:83332 (Mycobacterium tuberculosis)	taxid:83332 (Mycobacterium tuberculosis)	0	IPW-Rv3145-Rv3151	Kausik Bhattacharyya|hibeeluck@gmail.com|jhum4u2006@gmail.com
tuberculist:Rv3151	tuberculist:Rv3146	ncbigeneid:887540	ncbigeneid:888791	nuoG	nuoB	psi-mi:"MI:0914"(association)	psi-mi:"0686"	ISO	PMID: 14741580|PMID: 786986|PMID: 20553485|PMID: 17906132|PMID: 17501996	Friedrich T (2004)|Dancey GF (1976)|Meena LS (2010)|Golby P (2007)|Fu LM (2007)	taxid:83332 (Mycobacterium tuberculosis)	taxid:83332 (Mycobacterium tuberculosis)	0	IPW-Rv3146-Rv3151	Kausik Bhattacharyya|hibeeluck@gmail.com|jhum4u2006@gmail.com
tuberculist:Rv3151	tuberculist:Rv3147	ncbigeneid:887540	ncbigeneid:888816	nuoG	nuoC	psi-mi:"MI:0914"(association)	psi-mi:"0686"	ISO	PMID: 20553485|PMID: 14741580|PMID: 17906132|PMID: 786986|PMID: 17501996	Meena LS (2010)|Friedrich T (2004)|Golby P (2007)|Dancey GF (1976)|Fu LM (2007)	taxid:83332 (Mycobacterium tuberculosis)	taxid:83332 (Mycobacterium tuberculosis)	0	IPW-Rv3147-Rv3151	Kausik Bhattacharyya|hibeeluck@gmail.com|jhum4u2006@gmail.com
tuberculist:Rv3151	tuberculist:Rv3148	ncbigeneid:887540	ncbigeneid:888851	nuoG	nuoD	psi-mi:"MI:0914"(association)	psi-mi:"0686"	ISO	PMID: 20553485|PMID: 17501996|PMID: 14741580|PMID: 786986|PMID: 17906132	Meena LS (2010)|Fu LM (2007)|Friedrich T (2004)|Dancey GF (1976)|Golby P (2007)	taxid:83332 (Mycobacterium tuberculosis)	taxid:83332 (Mycobacterium tuberculosis)	0	IPW-Rv3148-Rv3151	Kausik Bhattacharyya|hibeeluck@gmail.com|jhum4u2006@gmail.com
tuberculist:Rv3151	tuberculist:Rv3149	ncbigeneid:887540	ncbigeneid:887903	nuoG	nuoE	psi-mi:"MI:0914"(association)	psi-mi:"0686"	ISO	PMID: 17501996|PMID: 786986|PMID: 14741580|PMID: 20553485|PMID: 17906132	Fu LM (2007)|Dancey GF (1976)|Friedrich T (2004)|Meena LS (2010)|Golby P (2007)	taxid:83332 (Mycobacterium tuberculosis)	taxid:83332 (Mycobacterium tuberculosis)	0	IPW-Rv3149-Rv3151	Kausik Bhattacharyya|hibeeluck@gmail.com|jhum4u2006@gmail.com
tuberculist:Rv3151	tuberculist:Rv3150	ncbigeneid:887540	ncbigeneid:888854	nuoG	nuoF	psi-mi:"MI:0914"(association)	psi-mi:"0686"	ISO	PMID: 20553485|PMID: 17906132|PMID: 14741580|PMID: 17501996|PMID: 786986	Meena LS (2010)|Golby P (2007)|Friedrich T (2004)|Fu LM (2007)|Dancey GF (1976)	taxid:83332 (Mycobacterium tuberculosis)	taxid:83332 (Mycobacterium tuberculosis)	0	IPW-Rv3150-Rv3151	Kausik Bhattacharyya|hibeeluck@gmail.com|jhum4u2006@gmail.com
tuberculist:Rv3151	tuberculist:Rv0757	ncbigeneid:887540	ncbigeneid:888772	nuoG	phoP	psi-mi:"MI:0914"(association)	psi-mi:"0400"	IMP	PMID: 786986|PMID: 20553485|PMID: 14741580|PMID: 20421951|PMID: 17906132|PMID: 18946503|PMID: 17658950|PMID: 17501996	Dancey GF (1976)|Meena LS (2010)|Friedrich T (2004)|Miller JL (2010)|Golby P (2007)|Gonzalo-Asensio J (2008)|Velmurugan K (2007)|Fu LM (2007)	taxid:83332 (Mycobacterium tuberculosis)	taxid:83332 (Mycobacterium tuberculosis)	0	IPW-Rv3151-Rv0757	Kausik Bhattacharyya|hibeeluck@gmail.com|jhum4u2006@gmail.com
tuberculist:Rv3151	tuberculist:Rv3145	ncbigeneid:887540	ncbigeneid:887397	nuoG	nuoA	psi-mi:"MI:0914"(association)	psi-mi:"0686"	ISO	PMID: 786986|PMID: 20553485|PMID: 14741580|PMID: 20421951|PMID: 17906132|PMID: 18946503|PMID: 17658950|PMID: 17501996	Dancey GF (1976)|Meena LS (2010)|Friedrich T (2004)|Miller JL (2010)|Golby P (2007)|Gonzalo-Asensio J (2008)|Velmurugan K (2007)|Fu LM (2007)	taxid:83332 (Mycobacterium tuberculosis)	taxid:83332 (Mycobacterium tuberculosis)	0	IPW-Rv3151-Rv3145	Kausik Bhattacharyya|hibeeluck@gmail.com|jhum4u2006@gmail.com
tuberculist:Rv3151	tuberculist:Rv3146	ncbigeneid:887540	ncbigeneid:888791	nuoG	nuoB	psi-mi:"MI:0914"(association)	psi-mi:"0686"	ISO	PMID: 786986|PMID: 20553485|PMID: 14741580|PMID: 20421951|PMID: 17906132|PMID: 18946503|PMID: 17658950|PMID: 17501996	Dancey GF (1976)|Meena LS (2010)|Friedrich T (2004)|Miller JL (2010)|Golby P (2007)|Gonzalo-Asensio J (2008)|Velmurugan K (2007)|Fu LM (2007)	taxid:83332 (Mycobacterium tuberculosis)	taxid:83332 (Mycobacterium tuberculosis)	0	IPW-Rv3151-Rv3146	Kausik Bhattacharyya|hibeeluck@gmail.com|jhum4u2006@gmail.com
tuberculist:Rv3151	tuberculist:Rv3147	ncbigeneid:887540	ncbigeneid:888816	nuoG	nuoC	psi-mi:"MI:0914"(association)	psi-mi:"0686"	ISO	PMID: 786986|PMID: 20553485|PMID: 14741580|PMID: 20421951|PMID: 17906132|PMID: 18946503|PMID: 17658950|PMID: 17501996	Dancey GF (1976)|Meena LS (2010)|Friedrich T (2004)|Miller JL (2010)|Golby P (2007)|Gonzalo-Asensio J (2008)|Velmurugan K (2007)|Fu LM (2007)	taxid:83332 (Mycobacterium tuberculosis)	taxid:83332 (Mycobacterium tuberculosis)	0	IPW-Rv3151-Rv3147	Kausik Bhattacharyya|hibeeluck@gmail.com|jhum4u2006@gmail.com
tuberculist:Rv3151	tuberculist:Rv3148	ncbigeneid:887540	ncbigeneid:888851	nuoG	nuoD	psi-mi:"MI:0914"(association)	psi-mi:"0686"	ISO	PMID: 786986|PMID: 20553485|PMID: 14741580|PMID: 20421951|PMID: 17906132|PMID: 18946503|PMID: 17658950|PMID: 17501996	Dancey GF (1976)|Meena LS (2010)|Friedrich T (2004)|Miller JL (2010)|Golby P (2007)|Gonzalo-Asensio J (2008)|Velmurugan K (2007)|Fu LM (2007)	taxid:83332 (Mycobacterium tuberculosis)	taxid:83332 (Mycobacterium tuberculosis)	0	IPW-Rv3151-Rv3148	Kausik Bhattacharyya|hibeeluck@gmail.com|jhum4u2006@gmail.com
tuberculist:Rv3151	tuberculist:Rv3149	ncbigeneid:887540	ncbigeneid:887903	nuoG	nuoE	psi-mi:"MI:0914"(association)	psi-mi:"0686"	ISO	PMID: 786986|PMID: 20553485|PMID: 14741580|PMID: 20421951|PMID: 17906132|PMID: 18946503|PMID: 17658950|PMID: 17501996	Dancey GF (1976)|Meena LS (2010)|Friedrich T (2004)|Miller JL (2010)|Golby P (2007)|Gonzalo-Asensio J (2008)|Velmurugan K (2007)|Fu LM (2007)	taxid:83332 (Mycobacterium tuberculosis)	taxid:83332 (Mycobacterium tuberculosis)	0	IPW-Rv3151-Rv3149	Kausik Bhattacharyya|hibeeluck@gmail.com|jhum4u2006@gmail.com
tuberculist:Rv3151	tuberculist:Rv3150	ncbigeneid:887540	ncbigeneid:888854	nuoG	nuoF	psi-mi:"MI:0914"(association)	psi-mi:"0686"	ISO	PMID: 786986|PMID: 20553485|PMID: 14741580|PMID: 20421951|PMID: 17906132|PMID: 18946503|PMID: 17658950|PMID: 17501996	Dancey GF (1976)|Meena LS (2010)|Friedrich T (2004)|Miller JL (2010)|Golby P (2007)|Gonzalo-Asensio J (2008)|Velmurugan K (2007)|Fu LM (2007)	taxid:83332 (Mycobacterium tuberculosis)	taxid:83332 (Mycobacterium tuberculosis)	0	IPW-Rv3151-Rv3150	Kausik Bhattacharyya|hibeeluck@gmail.com|jhum4u2006@gmail.com
tuberculist:Rv3151	tuberculist:Rv3152	ncbigeneid:887540	ncbigeneid:887531	nuoG	nuoH	psi-mi:"MI:0914"(association)	psi-mi:"0686"	ISO	PMID: 786986|PMID: 20553485|PMID: 14741580|PMID: 20421951|PMID: 17906132|PMID: 18946503|PMID: 17658950|PMID: 17501996	Dancey GF (1976)|Meena LS (2010)|Friedrich T (2004)|Miller JL (2010)|Golby P (2007)|Gonzalo-Asensio J (2008)|Velmurugan K (2007)|Fu LM (2007)	taxid:83332 (Mycobacterium tuberculosis)	taxid:83332 (Mycobacterium tuberculosis)	0	IPW-Rv3151-Rv3152	Kausik Bhattacharyya|hibeeluck@gmail.com|jhum4u2006@gmail.com
tuberculist:Rv3151	tuberculist:Rv3153	ncbigeneid:887540	ncbigeneid:887530	nuoG	nuoI	psi-mi:"MI:0914"(association)	psi-mi:"0686"	ISO	PMID: 786986|PMID: 20553485|PMID: 14741580|PMID: 20421951|PMID: 17906132|PMID: 18946503|PMID: 17658950|PMID: 17501996	Dancey GF (1976)|Meena LS (2010)|Friedrich T (2004)|Miller JL (2010)|Golby P (2007)|Gonzalo-Asensio J (2008)|Velmurugan K (2007)|Fu LM (2007)	taxid:83332 (Mycobacterium tuberculosis)	taxid:83332 (Mycobacterium tuberculosis)	0	IPW-Rv3151-Rv3153	Kausik Bhattacharyya|hibeeluck@gmail.com|jhum4u2006@gmail.com
tuberculist:Rv3151	tuberculist:Rv3154	ncbigeneid:887540	ncbigeneid:888762	nuoG	nuoJ	psi-mi:"MI:0914"(association)	psi-mi:"0686"	ISO	PMID: 786986|PMID: 20553485|PMID: 14741580|PMID: 20421951|PMID: 17906132|PMID: 18946503|PMID: 17658950|PMID: 17501996	Dancey GF (1976)|Meena LS (2010)|Friedrich T (2004)|Miller JL (2010)|Golby P (2007)|Gonzalo-Asensio J (2008)|Velmurugan K (2007)|Fu LM (2007)	taxid:83332 (Mycobacterium tuberculosis)	taxid:83332 (Mycobacterium tuberculosis)	0	IPW-Rv3151-Rv3154	Kausik Bhattacharyya|hibeeluck@gmail.com|jhum4u2006@gmail.com
tuberculist:Rv3151	tuberculist:Rv3155	ncbigeneid:887540	ncbigeneid:888764	nuoG	nuoK	psi-mi:"MI:0914"(association)	psi-mi:"0686"	ISO	PMID: 786986|PMID: 20553485|PMID: 14741580|PMID: 20421951|PMID: 17906132|PMID: 18946503|PMID: 17658950|PMID: 17501996	Dancey GF (1976)|Meena LS (2010)|Friedrich T (2004)|Miller JL (2010)|Golby P (2007)|Gonzalo-Asensio J (2008)|Velmurugan K (2007)|Fu LM (2007)	taxid:83332 (Mycobacterium tuberculosis)	taxid:83332 (Mycobacterium tuberculosis)	0	IPW-Rv3151-Rv3155	Kausik Bhattacharyya|hibeeluck@gmail.com|jhum4u2006@gmail.com
tuberculist:Rv3151	tuberculist:Rv3156	ncbigeneid:887540	ncbigeneid:888063	nuoG	nuoL	psi-mi:"MI:0914"(association)	psi-mi:"0686"	ISO	PMID: 786986|PMID: 20553485|PMID: 14741580|PMID: 20421951|PMID: 17906132|PMID: 18946503|PMID: 17658950|PMID: 17501996	Dancey GF (1976)|Meena LS (2010)|Friedrich T (2004)|Miller JL (2010)|Golby P (2007)|Gonzalo-Asensio J (2008)|Velmurugan K (2007)|Fu LM (2007)	taxid:83332 (Mycobacterium tuberculosis)	taxid:83332 (Mycobacterium tuberculosis)	0	IPW-Rv3151-Rv3156	Kausik Bhattacharyya|hibeeluck@gmail.com|jhum4u2006@gmail.com
tuberculist:Rv3151	tuberculist:Rv3157	ncbigeneid:887540	ncbigeneid:888765	nuoG	nuoM	psi-mi:"MI:0914"(association)	psi-mi:"0686"	ISO	PMID: 786986|PMID: 20553485|PMID: 14741580|PMID: 20421951|PMID: 17906132|PMID: 18946503|PMID: 17658950|PMID: 17501996	Dancey GF (1976)|Meena LS (2010)|Friedrich T (2004)|Miller JL (2010)|Golby P (2007)|Gonzalo-Asensio J (2008)|Velmurugan K (2007)|Fu LM (2007)	taxid:83332 (Mycobacterium tuberculosis)	taxid:83332 (Mycobacterium tuberculosis)	0	IPW-Rv3151-Rv3157	Kausik Bhattacharyya|hibeeluck@gmail.com|jhum4u2006@gmail.com
tuberculist:Rv3151	tuberculist:Rv3158	ncbigeneid:887540	ncbigeneid:888780	nuoG	nuoN	psi-mi:"MI:0914"(association)	psi-mi:"0686"	ISO	PMID: 786986|PMID: 20553485|PMID: 14741580|PMID: 20421951|PMID: 17906132|PMID: 18946503|PMID: 17658950|PMID: 17501996	Dancey GF (1976)|Meena LS (2010)|Friedrich T (2004)|Miller JL (2010)|Golby P (2007)|Gonzalo-Asensio J (2008)|Velmurugan K (2007)|Fu LM (2007)	taxid:83332 (Mycobacterium tuberculosis)	taxid:83332 (Mycobacterium tuberculosis)	0	IPW-Rv3151-Rv3158	Kausik Bhattacharyya|hibeeluck@gmail.com|jhum4u2006@gmail.com
tuberculist:Rv3221A	tuberculist:Rv0014c	ncbigeneid:3205091	ncbigeneid:887072	rshA	pknB	psi-mi:"MI:0914"(association)	psi-mi:"0400"	IPI	PMID: 17148687|PMID: 15978616|PMID: 18728196|PMID: 16436437|PMID: 15985609	Narayan A (2007)|Villarino A (2005)|Park ST (2008)|Dasgupta A (2006)|Kang CM (2005)	taxid:83332 (Mycobacterium tuberculosis)	taxid:83332 (Mycobacterium tuberculosis)	0	IPW-Rv0014c-Rv3221A	akanksha jain
tuberculist:Rv3221A	tuberculist:Rv3223c	ncbigeneid:3205091	ncbigeneid:888094	rshA	sigH	psi-mi:"MI:0914"(association)	psi-mi:"0400"	IDA	PMID: 16298337	Jeong EH (2006)	taxid:83332 (Mycobacterium tuberculosis)	taxid:83332 (Mycobacterium tuberculosis)	0	IPW-Rv3221A-Rv3223c	anupam mondal|akankshajain.21@gmail.com
tuberculist:Rv3221A	tuberculist:Rv3223c	ncbigeneid:3205091	ncbigeneid:888094	rshA	sigH	psi-mi:"MI:0914"(association)	psi-mi:"0255"	IEP|TAS	PMID: 19951358|PMID: 18728196|PMID: 11567012|PMID: 14617153	Sachdeva P (2010)|Park ST (2008)|Raman S (2001)|Song T (2003)	taxid:83332 (Mycobacterium tuberculosis)	taxid:83332 (Mycobacterium tuberculosis)	0	IPW-Rv3223c-Rv3221A	anupam mondal|sourish10@gmail.com
tuberculist:Rv3223c	tuberculist:Rv0141c	ncbigeneid:888094	ncbigeneid:886872	sigH	Rv0141c	psi-mi:"MI:0914"(association)	psi-mi:"0255"	NAS	PMID: 14454546|PMID: 9622484|PMID: 12123450	KAWAHARA FS (1962)|Cho HS (1998)|Manganelli R (2002)	taxid:83332 (Mycobacterium tuberculosis)	taxid:83332 (Mycobacterium tuberculosis)	0	IPW-Rv0141c-Rv3223c	Anup Shah|prabhakarsmail@gmail.com
tuberculist:Rv3223c	tuberculist:Rv0142	ncbigeneid:888094	ncbigeneid:886858	sigH	Rv0142	psi-mi:"MI:0914"(association)	psi-mi:"0255"	IEP	PMID: 19951358|PMID: 12123450	Sachdeva P (2010)|Manganelli R (2002)	taxid:83332 (Mycobacterium tuberculosis)	taxid:83332 (Mycobacterium tuberculosis)	0	IPW-Rv0142-Rv3223c	Anup Shah|prabhakarsmail@gmail.com
tuberculist:Rv3223c	tuberculist:Rv0182c	ncbigeneid:888094	ncbigeneid:886786	sigH	sigG	psi-mi:"MI:0914"(association)	psi-mi:"0255"	IEP	PMID: 18039768	Lee JH (2008)	taxid:83332 (Mycobacterium tuberculosis)	taxid:83332 (Mycobacterium tuberculosis)	0	IPW-Rv0182c-Rv3223c	Priti Vishnoi|priti.priety@gmail.com
tuberculist:Rv3223c	tuberculist:Rv0303	ncbigeneid:888094	ncbigeneid:886581	sigH	Rv0303	psi-mi:"MI:0914"(association)	psi-mi:"0255"	IEP	PMID: 19376862	Mehra S (2009)	taxid:83332 (Mycobacterium tuberculosis)	taxid:83332 (Mycobacterium tuberculosis)	0	IPW-Rv0303-Rv3223c	akanksha jain|sumaavasthi@gmail.com
tuberculist:Rv3223c	tuberculist:Rv0384c	ncbigeneid:888094	ncbigeneid:886440	sigH	clpB	psi-mi:"MI:0914"(association)	psi-mi:"0255"	IEP	PMID: 19592585|PMID: 11567012	Fontan PA (2009)|Raman S (2001)	taxid:83332 (Mycobacterium tuberculosis)	taxid:83332 (Mycobacterium tuberculosis)	0	IPW-Rv0384c-Rv3223c	Priti Vishnoi|priti.priety@gmail.com
tuberculist:Rv3223c	tuberculist:Rv0886	ncbigeneid:888094	ncbigeneid:885195	sigH	fprB	psi-mi:"MI:0914"(association)	psi-mi:"0255"	IMP	PMID: 19376862	Mehra S (2009)	taxid:83332 (Mycobacterium tuberculosis)	taxid:83332 (Mycobacterium tuberculosis)	0	IPW-Rv0886-Rv3223c	anupam mondal|sourish10@gmail.com
tuberculist:Rv3223c	tuberculist:Rv1019	ncbigeneid:888094	ncbigeneid:886056	sigH	Rv1019	psi-mi:"MI:0914"(association)	psi-mi:"0045"	IMP	PMID: 19376862	Mehra S (2009)	taxid:83332 (Mycobacterium tuberculosis)	taxid:83332 (Mycobacterium tuberculosis)	0	IPW-Rv1019-Rv3223c	Ashwini Bhat|ashwinigbhat@gmail.com
tuberculist:Rv3223c	tuberculist:Rv1072	ncbigeneid:888094	ncbigeneid:887114	sigH	Rv1072	psi-mi:"MI:0914"(association)	psi-mi:"0101"	NAS	PMID: 17471433	Jain SK (2007)	taxid:83332 (Mycobacterium tuberculosis)	taxid:83332 (Mycobacterium tuberculosis)	0	IPW-Rv1072-Rv3223c	anupam mondal|sourish10@gmail.com
tuberculist:Rv3223c	tuberculist:Rv1123c	ncbigeneid:888094	ncbigeneid:885965	sigH	bpoB	psi-mi:"MI:0914"(association)	psi-mi:"0045"	IDA	PMID: 19376862	Mehra S (2009)	taxid:83332 (Mycobacterium tuberculosis)	taxid:83332 (Mycobacterium tuberculosis)	0	IPW-Rv1123c-Rv3223c	Priti Vishnoi|anshula.arora1990@gmail.com
tuberculist:Rv3223c	tuberculist:Rv1223	ncbigeneid:888094	ncbigeneid:888912	sigH	htrA|degP	psi-mi:"MI:0914"(association)	psi-mi:"0045"	IMP	PMID: 20061478	White MJ (2010)	taxid:83332 (Mycobacterium tuberculosis)	taxid:83332 (Mycobacterium tuberculosis)	0	IPW-Rv1223-Rv3223c	Ashwini Bhat|harsharohiratruefriend@gmail.com
tuberculist:Rv3223c	tuberculist:Rv1336	ncbigeneid:888094	ncbigeneid:886867	sigH	cysM	psi-mi:"MI:0914"(association)	psi-mi:"0255"	IEP	PMID: 18799456|PMID: 12123450|PMID: 19101553|PMID: 18842002|PMID: 16104727|PMID: 18771296	Agren D (2008)|Manganelli R (2002)|Agren D (2009)|O'Leary SE (2008)|Burns KE (2005)|Jurgenson CT (2008)	taxid:83332 (Mycobacterium tuberculosis)	taxid:83332 (Mycobacterium tuberculosis)	0	IPW-Rv1336-Rv3223c	Anup Shah|shahanup86@gmail.com
tuberculist:Rv3223c	tuberculist:Rv1338	ncbigeneid:888094	ncbigeneid:886866	sigH	murI	psi-mi:"MI:0914"(association)	psi-mi:"0255"	IEP	PMID: 12123450|PMID: 17020913	Manganelli R (2002)|Sengupta S (2006)	taxid:83332 (Mycobacterium tuberculosis)	taxid:83332 (Mycobacterium tuberculosis)	0	IPW-Rv1338-Rv3223c	Anup Shah|shahanup86@gmail.com
tuberculist:Rv3223c	tuberculist:Rv1528c	ncbigeneid:888094	ncbigeneid:886028	sigH	papA4	psi-mi:"MI:0914"(association)	psi-mi:"0255"	IEP	PMID: 12123450|PMID: 19181796|PMID: 17259623	Manganelli R (2002)|Etienne G (2009)|Bhatt K (2007)	taxid:83332 (Mycobacterium tuberculosis)	taxid:83332 (Mycobacterium tuberculosis)	0	IPW-Rv1528c-Rv3223c	akanksha jain|sharanya123@gmail.com
tuberculist:Rv3223c	tuberculist:Rv1921c	ncbigeneid:888094	ncbigeneid:885917	sigH	lppF	psi-mi:"MI:0914"(association)	psi-mi:"0045"	IDA	PMID: 15539077|PMID: 19376862	Sutcliffe IC (2004)|Mehra S (2009)	taxid:83332 (Mycobacterium tuberculosis)	taxid:83332 (Mycobacterium tuberculosis)	0	IPW-Rv1921c-Rv3223c	Ashwini Bhat|kaveri.verma@gmail.com
tuberculist:Rv3223c	tuberculist:Rv2050	ncbigeneid:888094	ncbigeneid:888598	sigH	Rv2050	psi-mi:"MI:0914"(association)	psi-mi:"0686"	TAS	PMID: 19332811|PMID: 11489128	Provvedi R (2009)|Manganelli R (2001)	taxid:83332 (Mycobacterium tuberculosis)	taxid:83332 (Mycobacterium tuberculosis)	0	IPW-Rv2050-Rv3223c	Anup Shah|shahanup86@gmail.com
tuberculist:Rv3223c	tuberculist:Rv2442c	ncbigeneid:888094	ncbigeneid:885715	sigH	rplU	psi-mi:"MI:0914"(association)	psi-mi:"0255"	IEP	PMID: 19376862	Mehra S (2009)	taxid:83332 (Mycobacterium tuberculosis)	taxid:83332 (Mycobacterium tuberculosis)	0	IPW-Rv2442c-Rv3223c	Priti Vishnoi|salluamity1@gmail.com
tuberculist:Rv3223c	tuberculist:Rv2453c	ncbigeneid:888094	ncbigeneid:885904	sigH	mobA	psi-mi:"MI:0914"(association)	psi-mi:"0255"	IEP	PMID: 17209031|PMID: 19936047|PMID: 12123450	Godert AM (2007)|Baughn AD (2009)|Manganelli R (2002)	taxid:83332 (Mycobacterium tuberculosis)	taxid:83332 (Mycobacterium tuberculosis)	0	IPW-Rv2453c-Rv3223c	akanksha jain|akankshajain.21@gmail.com
tuberculist:Rv3223c	tuberculist:Rv2466c	ncbigeneid:888094	ncbigeneid:888214	sigH	Rv2466c	psi-mi:"MI:0914"(association)	psi-mi:"0255"	IEP	PMID: 17938223|PMID: 11567012	Alonso-Hearn M (2008)|Raman S (2001)	taxid:83332 (Mycobacterium tuberculosis)	taxid:83332 (Mycobacterium tuberculosis)	0	IPW-Rv2466c-Rv3223c	Priti Vishnoi|priti.priety@gmail.com
tuberculist:Rv3223c	tuberculist:Rv3198A	ncbigeneid:888094	ncbigeneid:3205084	sigH	Rv3198A	psi-mi:"MI:0914"(association)	psi-mi:"0255"	IEP	PMID: 11169096|PMID: 11567012|PMID: 1390715	Grant CM (2001)|Raman S (2001)|Bushweller JH (1992)	taxid:83332 (Mycobacterium tuberculosis)	taxid:83332 (Mycobacterium tuberculosis)	0	IPW-Rv3198A-Rv3223c	anupam mondal|kholia.trupti@gmail.com
tuberculist:Rv3223c	tuberculist:Rv3221A	ncbigeneid:888094	ncbigeneid:3205091	sigH	rshA	psi-mi:"MI:0914"(association)	psi-mi:"0400"	IDA	PMID: 16298337	Jeong EH (2006)	taxid:83332 (Mycobacterium tuberculosis)	taxid:83332 (Mycobacterium tuberculosis)	0	IPW-Rv3221A-Rv3223c	anupam mondal|akankshajain.21@gmail.com
tuberculist:Rv3223c	tuberculist:Rv0014c	ncbigeneid:888094	ncbigeneid:887072	sigH	pknB	psi-mi:"MI:0914"(association)	psi-mi:"0255"	IEP|TAS	PMID: 19951358|PMID: 18728196|PMID: 11567012|PMID: 14617153	Sachdeva P (2010)|Park ST (2008)|Raman S (2001)|Song T (2003)	taxid:83332 (Mycobacterium tuberculosis)	taxid:83332 (Mycobacterium tuberculosis)	0	IPW-Rv3223c-Rv0014c	anupam mondal|sourish10@gmail.com
tuberculist:Rv3223c	tuberculist:Rv0142	ncbigeneid:888094	ncbigeneid:886858	sigH	Rv0142	psi-mi:"MI:0914"(association)	psi-mi:"0255"	IEP|TAS	PMID: 19951358|PMID: 18728196|PMID: 11567012|PMID: 14617153	Sachdeva P (2010)|Park ST (2008)|Raman S (2001)|Song T (2003)	taxid:83332 (Mycobacterium tuberculosis)	taxid:83332 (Mycobacterium tuberculosis)	0	IPW-Rv3223c-Rv0142	anupam mondal|sourish10@gmail.com
tuberculist:Rv3223c	tuberculist:Rv1221	ncbigeneid:888094	ncbigeneid:888751	sigH	sigE	psi-mi:"MI:0914"(association)	psi-mi:"0101"	NAS	PMID: 19951358|PMID: 18728196|PMID: 11567012|PMID: 14617153	Sachdeva P (2010)|Park ST (2008)|Raman S (2001)|Song T (2003)	taxid:83332 (Mycobacterium tuberculosis)	taxid:83332 (Mycobacterium tuberculosis)	0	IPW-Rv3223c-Rv1221	anupam mondal|sourish10@gmail.com
tuberculist:Rv3223c	tuberculist:Rv1471	ncbigeneid:888094	ncbigeneid:886554	sigH	trxB1	psi-mi:"MI:0914"(association)	psi-mi:"0255"	IEP|TAS	PMID: 19951358|PMID: 18728196|PMID: 11567012|PMID: 14617153	Sachdeva P (2010)|Park ST (2008)|Raman S (2001)|Song T (2003)	taxid:83332 (Mycobacterium tuberculosis)	taxid:83332 (Mycobacterium tuberculosis)	0	IPW-Rv3223c-Rv1471	anupam mondal|sourish10@gmail.com
tuberculist:Rv3223c	tuberculist:Rv2466c	ncbigeneid:888094	ncbigeneid:888214	sigH	Rv2466c	psi-mi:"MI:0914"(association)	psi-mi:"0686"	IDA	PMID: 19951358|PMID: 18728196|PMID: 11567012|PMID: 14617153	Sachdeva P (2010)|Park ST (2008)|Raman S (2001)|Song T (2003)	taxid:83332 (Mycobacterium tuberculosis)	taxid:83332 (Mycobacterium tuberculosis)	0	IPW-Rv3223c-Rv2466c	akanksha jain|vmevada102@gmail.com
tuberculist:Rv3223c	tuberculist:Rv2710	ncbigeneid:888094	ncbigeneid:888580	sigH	sigB	psi-mi:"MI:0914"(association)	psi-mi:"0255"	IEP|TAS	PMID: 19951358|PMID: 18728196|PMID: 11567012|PMID: 14617153	Sachdeva P (2010)|Park ST (2008)|Raman S (2001)|Song T (2003)	taxid:83332 (Mycobacterium tuberculosis)	taxid:83332 (Mycobacterium tuberculosis)	0	IPW-Rv3223c-Rv2710	anupam mondal|sourish10@gmail.com
tuberculist:Rv3223c	tuberculist:Rv3221A	ncbigeneid:888094	ncbigeneid:3205091	sigH	rshA	psi-mi:"MI:0914"(association)	psi-mi:"0255"	IEP|TAS	PMID: 19951358|PMID: 18728196|PMID: 11567012|PMID: 14617153	Sachdeva P (2010)|Park ST (2008)|Raman S (2001)|Song T (2003)	taxid:83332 (Mycobacterium tuberculosis)	taxid:83332 (Mycobacterium tuberculosis)	0	IPW-Rv3223c-Rv3221A	anupam mondal|sourish10@gmail.com
tuberculist:Rv3223c	tuberculist:Rv3223c	ncbigeneid:888094	ncbigeneid:888094	sigH	sigH	psi-mi:"MI:0914"(association)	psi-mi:"0255"	IEP	PMID: 19951358|PMID: 18728196|PMID: 11567012|PMID: 14617153	Sachdeva P (2010)|Park ST (2008)|Raman S (2001)|Song T (2003)	taxid:83332 (Mycobacterium tuberculosis)	taxid:83332 (Mycobacterium tuberculosis)	0	IPW-Rv3223c-Rv3223c	Priyanka Priyadarshini|manish.srcp@gmail.com
tuberculist:Rv3223c	tuberculist:Rv3913	ncbigeneid:888094	ncbigeneid:886232	sigH	trxB2	psi-mi:"MI:0914"(association)	psi-mi:"0255"	IEP|TAS	PMID: 19951358|PMID: 18728196|PMID: 11567012|PMID: 14617153	Sachdeva P (2010)|Park ST (2008)|Raman S (2001)|Song T (2003)	taxid:83332 (Mycobacterium tuberculosis)	taxid:83332 (Mycobacterium tuberculosis)	0	IPW-Rv3223c-Rv3913	anupam mondal|sourish10@gmail.com
tuberculist:Rv3223c	tuberculist:Rv3914	ncbigeneid:888094	ncbigeneid:886241	sigH	trx|trxA|mpt46	psi-mi:"MI:0914"(association)	psi-mi:"0255"	IEP|TAS	PMID: 19951358|PMID: 18728196|PMID: 11567012|PMID: 14617153	Sachdeva P (2010)|Park ST (2008)|Raman S (2001)|Song T (2003)	taxid:83332 (Mycobacterium tuberculosis)	taxid:83332 (Mycobacterium tuberculosis)	0	IPW-Rv3223c-Rv3914	anupam mondal|sourish10@gmail.com
tuberculist:Rv3223c	tuberculist:Rv3692	ncbigeneid:888094	ncbigeneid:885323	sigH	moxR2	psi-mi:"MI:0914"(association)	psi-mi:"0686"	NAS	PMID: 19376862	Mehra S (2009)	taxid:83332 (Mycobacterium tuberculosis)	taxid:83332 (Mycobacterium tuberculosis)	0	IPW-Rv3692-Rv3223c	akanksha jain|priyadarshinipriyanka2001@gmail.com|aparna.vchalam@gmail.com
tuberculist:Rv3223c	tuberculist:Rv3753c	ncbigeneid:888094	ncbigeneid:885505	sigH	Rv3753c	psi-mi:"MI:0914"(association)	psi-mi:"0255"	IEP	PMID: 19376862	Mehra S (2009)	taxid:83332 (Mycobacterium tuberculosis)	taxid:83332 (Mycobacterium tuberculosis)	0	IPW-Rv3753c-Rv3223c	anupam mondal|priti.priety@gmail.com|ashwinigbhat@gmail.com
tuberculist:Rv3286c	tuberculist:Rv0003	ncbigeneid:888727	ncbigeneid:887089	sigF	recF	psi-mi:"MI:0914"(association)	psi-mi:"0255"	IEP	PMID: 9781872|PMID: 14654685|PMID: 20455546|PMID: 17384187	Mizrahi V (1998)|Strong M (2003)|Singh P (2010)|Williams EP (2007)	taxid:83332 (Mycobacterium tuberculosis)	taxid:83332 (Mycobacterium tuberculosis)	0	IPW-Rv0003-Rv3286c	Anup Shah|shahanup86@gmail.com
tuberculist:Rv3286c	tuberculist:Rv0152c	ncbigeneid:888727	ncbigeneid:886838	sigF	PE2	psi-mi:"MI:0914"(association)	psi-mi:"0255"	IEP	PMID: 17384187|PMID: 16458305	Williams EP (2007)|Tundup S (2006)	taxid:83332 (Mycobacterium tuberculosis)	taxid:83332 (Mycobacterium tuberculosis)	0	IPW-Rv0152c-Rv3286c	Anup Shah|prabhakarsmail@gmail.com
tuberculist:Rv3286c	tuberculist:Rv0158	ncbigeneid:888727	ncbigeneid:886828	sigF	0	psi-mi:"MI:0914"(association)	psi-mi:"0255"	IEP	PMID: 17384187	Williams EP (2007)	taxid:83332 (Mycobacterium tuberculosis)	taxid:83332 (Mycobacterium tuberculosis)	0	IPW-Rv0158-Rv3286c	Anup Shah|yashabhasin@gmail.com
tuberculist:Rv3286c	tuberculist:Rv0328	ncbigeneid:888727	ncbigeneid:886542	sigF	Rv0328	psi-mi:"MI:0914"(association)	psi-mi:"0255"	IEP	PMID: 9634230|PMID: 17089148	Cole ST (1998)|Homerova D (2007)	taxid:83332 (Mycobacterium tuberculosis)	taxid:83332 (Mycobacterium tuberculosis)	0	IPW-Rv0328-Rv3286c	Anup Shah|vizhi.gurusamy@gmail.com
tuberculist:Rv3286c	tuberculist:Rv0516c	ncbigeneid:888727	ncbigeneid:887324	sigF	Rv0516c	psi-mi:"MI:0914"(association)	psi-mi:"0045"	IPI	PMID: 17485404|PMID: 16263329|PMID: 17411339	Dhandayuthapani S (2007)|Parida BK (2005)|Greenstein AE (2007)	taxid:83332 (Mycobacterium tuberculosis)	taxid:83332 (Mycobacterium tuberculosis)	0	IPW-Rv0516c-Rv3286c	Anup Shah|yashabhasin@gmail.com
tuberculist:Rv3286c	tuberculist:Rv0546c	ncbigeneid:888727	ncbigeneid:887509	sigF	Rv0546c	psi-mi:"MI:0914"(association)	psi-mi:"0402"	IDA	PMID: 17158685|PMID: 19300498	Rodrigue S (2007)|Yam KC (2009)	taxid:83332 (Mycobacterium tuberculosis)	taxid:83332 (Mycobacterium tuberculosis)	0	IPW-Rv0546c-Rv3286c	akanksha jain|akankshajain.21@gmail.com
tuberculist:Rv3286c	tuberculist:Rv0547c	ncbigeneid:888727	ncbigeneid:887527	sigF	Rv0547c	psi-mi:"MI:0914"(association)	psi-mi:"0402"	IPI	PMID: 17158685	Rodrigue S (2007)	taxid:83332 (Mycobacterium tuberculosis)	taxid:83332 (Mycobacterium tuberculosis)	0	IPW-Rv0547c-Rv3286c	akanksha jain|akankshajain.21@gmail.com
tuberculist:Rv3286c	tuberculist:Rv0941c	ncbigeneid:888727	ncbigeneid:885914	sigF	0	psi-mi:"MI:0914"(association)	psi-mi:"0013"	ISA	PMID: 17411339|PMID: 10662676|PMID: 9560229	Greenstein AE (2007)|Aravind L (2000)|Kovacs H (1998)	taxid:83332 (Mycobacterium tuberculosis)	taxid:83332 (Mycobacterium tuberculosis)	0	IPW-Rv0941c-Rv3286c	Priti Vishnoi|yashabhasin@gmail.com
tuberculist:Rv3286c	tuberculist:Rv1054	ncbigeneid:888727	ncbigeneid:887139	sigF	Rv1054	psi-mi:"MI:0914"(association)	psi-mi:"0045"	IDA	PMID: 17089148	Homerova D (2007)	taxid:83332 (Mycobacterium tuberculosis)	taxid:83332 (Mycobacterium tuberculosis)	0	IPW-Rv1054-Rv3286c	Ashwini Bhat|prabhakarsmail@gmail.com
tuberculist:Rv3286c	tuberculist:Rv1055	ncbigeneid:888727	ncbigeneid:887138	sigF	Rv1055	psi-mi:"MI:0914"(association)	psi-mi:"0045"	IDA	PMID: 17089148	Homerova D (2007)	taxid:83332 (Mycobacterium tuberculosis)	taxid:83332 (Mycobacterium tuberculosis)	0	IPW-Rv1055-Rv3286c	Ashwini Bhat|prabhakarsmail@gmail.com
tuberculist:Rv3286c	tuberculist:Rv1252c	ncbigeneid:888727	ncbigeneid:887064	sigF	lprE	psi-mi:"MI:0914"(association)	psi-mi:"0255"	IEP	PMID: 15539077|PMID: 17384187	Sutcliffe IC (2004)|Williams EP (2007)	taxid:83332 (Mycobacterium tuberculosis)	taxid:83332 (Mycobacterium tuberculosis)	0	IPW-Rv1252c-Rv3286c	Anup Shah|aparna.vchalam@gmail.com
tuberculist:Rv3286c	tuberculist:Rv1342c	ncbigeneid:888727	ncbigeneid:886862	sigF	Rv1342c	psi-mi:"MI:0914"(association)	psi-mi:"0255"	TAS	PMID: 17384187	Williams EP (2007)	taxid:83332 (Mycobacterium tuberculosis)	taxid:83332 (Mycobacterium tuberculosis)	0	IPW-Rv1342c-Rv3286c	anupam mondal|sourish10@gmail.com
tuberculist:Rv3286c	tuberculist:Rv1364c	ncbigeneid:888727	ncbigeneid:886802	sigF	rsbU	psi-mi:"MI:0914"(association)	psi-mi:"0686"	IDA	PMID: 19016841|PMID: 15063504|PMID: 16263329|PMID: 20541534	Sachdeva P (2008)|Li MS (2004)|Parida BK (2005)|Jaiswal RK (2010)	taxid:83332 (Mycobacterium tuberculosis)	taxid:83332 (Mycobacterium tuberculosis)	0	IPW-Rv1364c-Rv3286c	akanksha jain|swetha.r@gmail.com
tuberculist:Rv3286c	tuberculist:Rv1441c	ncbigeneid:888727	ncbigeneid:886626	sigF	PE_PGRS26	psi-mi:"MI:0914"(association)	psi-mi:"0255"	TAS	PMID: 18957600	Singh PP (2008)	taxid:83332 (Mycobacterium tuberculosis)	taxid:83332 (Mycobacterium tuberculosis)	0	IPW-Rv1441c-Rv3286c	anupam mondal|priti.priety@gmail.com|ashwinigbhat@gmail.com
tuberculist:Rv3286c	tuberculist:Rv1696	ncbigeneid:888727	ncbigeneid:885805	sigF	recN	psi-mi:"MI:0914"(association)	psi-mi:"0255"	IEP	PMID: 15849320|PMID: 16199577|PMID: 18039768	Sanchez H (2005)|Hahn MY (2005)|Lee JH (2008)	taxid:83332 (Mycobacterium tuberculosis)	taxid:83332 (Mycobacterium tuberculosis)	0	IPW-Rv1696-Rv3286c	Anup Shah|salluamity1@gmail.com
tuberculist:Rv3286c	tuberculist:Rv1823	ncbigeneid:888727	ncbigeneid:885547	sigF	Rv1823	psi-mi:"MI:0914"(association)	psi-mi:"0255"	IEP	PMID: 17089148|PMID: 17384187	Homerova D (2007)|Williams EP (2007)	taxid:83332 (Mycobacterium tuberculosis)	taxid:83332 (Mycobacterium tuberculosis)	0	IPW-Rv1823-Rv3286c	anupam mondal|madhulsbu@gmail.com
tuberculist:Rv3286c	tuberculist:Rv1824	ncbigeneid:888727	ncbigeneid:885719	sigF	Rv1824	psi-mi:"MI:0914"(association)	psi-mi:"0255"	IEP	PMID: 17384187|PMID: 17089148	Williams EP (2007)|Homerova D (2007)	taxid:83332 (Mycobacterium tuberculosis)	taxid:83332 (Mycobacterium tuberculosis)	0	IPW-Rv1824-Rv3286c	anupam mondal|madhulsbu@gmail.com
tuberculist:Rv3286c	tuberculist:Rv1869c	ncbigeneid:888727	ncbigeneid:885796	sigF	Rv1869c	psi-mi:"MI:0914"(association)	psi-mi:"0402"	IPI	PMID: 17158685	Rodrigue S (2007)	taxid:83332 (Mycobacterium tuberculosis)	taxid:83332 (Mycobacterium tuberculosis)	0	IPW-Rv1869c-Rv3286c	akanksha jain|madhulsbu@gmail.com
tuberculist:Rv3286c	tuberculist:Rv1870c	ncbigeneid:888727	ncbigeneid:885797	sigF	Rv1870c	psi-mi:"MI:0914"(association)	psi-mi:"0402"	IPI	PMID: 17158685	Rodrigue S (2007)	taxid:83332 (Mycobacterium tuberculosis)	taxid:83332 (Mycobacterium tuberculosis)	0	IPW-Rv1870c-Rv3286c	akanksha jain|madhulsbu@gmail.com
tuberculist:Rv3286c	tuberculist:Rv1871c	ncbigeneid:888727	ncbigeneid:885804	sigF	Rv1871c	psi-mi:"MI:0914"(association)	psi-mi:"0402"	IPI	PMID: 17158685	Rodrigue S (2007)	taxid:83332 (Mycobacterium tuberculosis)	taxid:83332 (Mycobacterium tuberculosis)	0	IPW-Rv1871c-Rv3286c	akanksha jain|madhulsbu@gmail.com
tuberculist:Rv3286c	tuberculist:Rv1904	ncbigeneid:888727	ncbigeneid:885281	sigF	Rv1904|Rv1904	psi-mi:"MI:0914"(association)	psi-mi:"0045"	IPI	PMID: 17411339|PMID: 16263329	Greenstein AE (2007)|Parida BK (2005)	taxid:83332 (Mycobacterium tuberculosis)	taxid:83332 (Mycobacterium tuberculosis)	0	IPW-Rv1904-Rv3286c	Ashwini Bhat|kaveri.verma@gmail.com
tuberculist:Rv3286c	tuberculist:Rv2023A	ncbigeneid:888727	ncbigeneid:3205050	sigF	Rv2023A	psi-mi:"MI:0914"(association)	psi-mi:"0402"	IPI	PMID: 17158685	Rodrigue S (2007)	taxid:83332 (Mycobacterium tuberculosis)	taxid:83332 (Mycobacterium tuberculosis)	0	IPW-Rv2023A-Rv3286c	Priti Vishnoi|akankshajain.21@gmail.com|prabhakarsmail@gmail.com
tuberculist:Rv3286c	tuberculist:Rv2023c	ncbigeneid:888727	ncbigeneid:887444	sigF	Rv2023c	psi-mi:"MI:0914"(association)	psi-mi:"0402"	IPI	PMID: 17158685	Rodrigue S (2007)	taxid:83332 (Mycobacterium tuberculosis)	taxid:83332 (Mycobacterium tuberculosis)	0	IPW-Rv2023c-Rv3286c	Priti Vishnoi|akankshajain.21@gmail.com|prabhakarsmail@gmail.com
tuberculist:Rv3286c	tuberculist:Rv2638	ncbigeneid:888727	ncbigeneid:888156	sigF	Rv2638	psi-mi:"MI:0914"(association)	psi-mi:"0045"	IPI	PMID: 16263329	Parida BK (2005)	taxid:83332 (Mycobacterium tuberculosis)	taxid:83332 (Mycobacterium tuberculosis)	0	IPW-Rv2638-Rv3286c	Anup Shah|yashabhasin@gmail.com
tuberculist:Rv3286c	tuberculist:Rv2884	ncbigeneid:888727	ncbigeneid:887443	sigF	Rv2884	psi-mi:"MI:0914"(association)	psi-mi:"0255"	IPI	PMID: 17384187|PMID: 15881404	Williams EP (2007)|Homerova D (2004)	taxid:83332 (Mycobacterium tuberculosis)	taxid:83332 (Mycobacterium tuberculosis)	0	IPW-Rv2884-Rv3286c	Anup Shah|ashwinigbhat@gmail.com
tuberculist:Rv3286c	tuberculist:Rv3210c	ncbigeneid:888727	ncbigeneid:888876	sigF	Rv3210c	psi-mi:"MI:0914"(association)	psi-mi:"0400"	IPI	PMID: 17158685	Rodrigue S (2007)	taxid:83332 (Mycobacterium tuberculosis)	taxid:83332 (Mycobacterium tuberculosis)	0	IPW-Rv3210c-Rv3286c	anupam mondal|sourish10@gmail.com
tuberculist:Rv3286c	tuberculist:Rv3211	ncbigeneid:888727	ncbigeneid:888840	sigF	rhlE	psi-mi:"MI:0914"(association)	psi-mi:"0400"	IPI	PMID: 17158685|PMID: 20106955	Rodrigue S (2007)|Gorna MW (2010)	taxid:83332 (Mycobacterium tuberculosis)	taxid:83332 (Mycobacterium tuberculosis)	0	IPW-Rv3211-Rv3286c	anupam mondal|sourish10@gmail.com
tuberculist:Rv3286c	tuberculist:Rv0516c	ncbigeneid:888727	ncbigeneid:887324	sigF	Rv0516c	psi-mi:"MI:0914"(association)	psi-mi:"0255"	IDA	PMID: 17485404|PMID: 12354223|PMID: 16263329|PMID: 17384187	Dhandayuthapani S (2007)|Beaucher J (2002)|Parida BK (2005)|Williams EP (2007)	taxid:83332 (Mycobacterium tuberculosis)	taxid:83332 (Mycobacterium tuberculosis)	0	IPW-Rv3286c-Rv0516c	anupam mondal|hibeeluck@gmail.com
tuberculist:Rv3286c	tuberculist:Rv1364c	ncbigeneid:888727	ncbigeneid:886802	sigF	rsbU	psi-mi:"MI:0914"(association)	psi-mi:"0255"	IDA	PMID: 17485404|PMID: 12354223|PMID: 16263329|PMID: 17384187	Dhandayuthapani S (2007)|Beaucher J (2002)|Parida BK (2005)|Williams EP (2007)	taxid:83332 (Mycobacterium tuberculosis)	taxid:83332 (Mycobacterium tuberculosis)	0	IPW-Rv3286c-Rv1364c	anupam mondal|hibeeluck@gmail.com
tuberculist:Rv3286c	tuberculist:Rv1365c	ncbigeneid:888727	ncbigeneid:886794	sigF	rsfA	psi-mi:"MI:0914"(association)	psi-mi:"0255"	IDA	PMID: 17485404|PMID: 12354223|PMID: 16263329|PMID: 17384187	Dhandayuthapani S (2007)|Beaucher J (2002)|Parida BK (2005)|Williams EP (2007)	taxid:83332 (Mycobacterium tuberculosis)	taxid:83332 (Mycobacterium tuberculosis)	0	IPW-Rv3286c-Rv1365c	anupam mondal|hibeeluck@gmail.com
tuberculist:Rv3286c	tuberculist:Rv1904	ncbigeneid:888727	ncbigeneid:885281	sigF	Rv1904|Rv1904	psi-mi:"MI:0914"(association)	psi-mi:"0255"	IDA	PMID: 17485404|PMID: 12354223|PMID: 16263329|PMID: 17384187	Dhandayuthapani S (2007)|Beaucher J (2002)|Parida BK (2005)|Williams EP (2007)	taxid:83332 (Mycobacterium tuberculosis)	taxid:83332 (Mycobacterium tuberculosis)	0	IPW-Rv3286c-Rv1904	anupam mondal|hibeeluck@gmail.com
tuberculist:Rv3286c	tuberculist:Rv2638	ncbigeneid:888727	ncbigeneid:888156	sigF	Rv2638	psi-mi:"MI:0914"(association)	psi-mi:"0255"	IDA	PMID: 17485404|PMID: 12354223|PMID: 16263329|PMID: 17384187	Dhandayuthapani S (2007)|Beaucher J (2002)|Parida BK (2005)|Williams EP (2007)	taxid:83332 (Mycobacterium tuberculosis)	taxid:83332 (Mycobacterium tuberculosis)	0	IPW-Rv3286c-Rv2638	anupam mondal|hibeeluck@gmail.com
tuberculist:Rv3286c	tuberculist:Rv3286c	ncbigeneid:888727	ncbigeneid:888727	sigF	sigF	psi-mi:"MI:0914"(association)	psi-mi:"0686"	0	PMID: 17485404|PMID: 12354223|PMID: 16263329|PMID: 17384187	Dhandayuthapani S (2007)|Beaucher J (2002)|Parida BK (2005)|Williams EP (2007)	taxid:83332 (Mycobacterium tuberculosis)	taxid:83332 (Mycobacterium tuberculosis)	0	IPW-Rv3286c-Rv3286c	anupam mondal
tuberculist:Rv3286c	tuberculist:Rv3287c	ncbigeneid:888727	ncbigeneid:887977	sigF	rsbW|usfX	psi-mi:"MI:0914"(association)	psi-mi:"0255"	IDA	PMID: 17485404|PMID: 12354223|PMID: 16263329|PMID: 17384187	Dhandayuthapani S (2007)|Beaucher J (2002)|Parida BK (2005)|Williams EP (2007)	taxid:83332 (Mycobacterium tuberculosis)	taxid:83332 (Mycobacterium tuberculosis)	0	IPW-Rv3286c-Rv3287c	anupam mondal|hibeeluck@gmail.com
tuberculist:Rv3286c	tuberculist:Rv3301c	ncbigeneid:888727	ncbigeneid:887212	sigF	phoY1	psi-mi:"MI:0914"(association)	psi-mi:"0255"	IDA	PMID: 17485404|PMID: 12354223|PMID: 16263329|PMID: 17384187	Dhandayuthapani S (2007)|Beaucher J (2002)|Parida BK (2005)|Williams EP (2007)	taxid:83332 (Mycobacterium tuberculosis)	taxid:83332 (Mycobacterium tuberculosis)	0	IPW-Rv3286c-Rv3301c	anupam mondal|hibeeluck@gmail.com
tuberculist:Rv3286c	tuberculist:Rv3687c	ncbigeneid:888727	ncbigeneid:885599	sigF	rsfB	psi-mi:"MI:0914"(association)	psi-mi:"0255"	IDA	PMID: 17485404|PMID: 12354223|PMID: 16263329|PMID: 17384187	Dhandayuthapani S (2007)|Beaucher J (2002)|Parida BK (2005)|Williams EP (2007)	taxid:83332 (Mycobacterium tuberculosis)	taxid:83332 (Mycobacterium tuberculosis)	0	IPW-Rv3286c-Rv3687c	anupam mondal|hibeeluck@gmail.com
tuberculist:Rv3286c	tuberculist:Rv3287c	ncbigeneid:888727	ncbigeneid:887977	sigF	rsbW|usfX	psi-mi:"MI:0914"(association)	psi-mi:"0013"	IDA	PMID: 16263329|PMID: 12354223|PMID: 9666957|PMID: 19016841|PMID: 17064287	Parida BK (2005)|Beaucher J (2002)|DeMaio J (1997)|Sachdeva P (2008)|Rodrigue S (2006)	taxid:83332 (Mycobacterium tuberculosis)	taxid:83332 (Mycobacterium tuberculosis)	0	IPW-Rv3287c-Rv3286c	anupam mondal|vijayachitra@gmail.com
tuberculist:Rv3286c	tuberculist:Rv3300c	ncbigeneid:888727	ncbigeneid:887958	sigF	Rv3300c	psi-mi:"MI:0914"(association)	psi-mi:"0255"	IEP	PMID: 17384187	Williams EP (2007)	taxid:83332 (Mycobacterium tuberculosis)	taxid:83332 (Mycobacterium tuberculosis)	0	IPW-Rv3300c-Rv3286c	Priyanka Priyadarshini|priyadarshinipriyanka2001@gmail.com
tuberculist:Rv3286c	tuberculist:Rv3301c	ncbigeneid:888727	ncbigeneid:887212	sigF	phoY1	psi-mi:"MI:0914"(association)	psi-mi:"0255"	IEP	PMID: 17384187	Williams EP (2007)	taxid:83332 (Mycobacterium tuberculosis)	taxid:83332 (Mycobacterium tuberculosis)	0	IPW-Rv3301c-Rv3286c	Priyanka Priyadarshini|sourish10@gmail.com|ahal4789@gmail.com
tuberculist:Rv3286c	tuberculist:Rv3476c	ncbigeneid:888727	ncbigeneid:888002	sigF	kgtP	psi-mi:"MI:0914"(association)	psi-mi:"0255"	IEP	PMID: 8419306|PMID: 17384187	Seol W (1993)|Williams EP (2007)	taxid:83332 (Mycobacterium tuberculosis)	taxid:83332 (Mycobacterium tuberculosis)	0	IPW-Rv3476c-Rv3286c	Anup Shah|shahanup86@gmail.com
tuberculist:Rv3286c	tuberculist:Rv3604c	ncbigeneid:888727	ncbigeneid:885232	sigF	Rv3604c	psi-mi:"MI:0914"(association)	psi-mi:"0255"	IEP	PMID: 17158685	Rodrigue S (2007)	taxid:83332 (Mycobacterium tuberculosis)	taxid:83332 (Mycobacterium tuberculosis)	0	IPW-Rv3604c-Rv3286c	anupam mondal|sourish10@gmail.com
tuberculist:Rv3286c	tuberculist:Rv3605c	ncbigeneid:888727	ncbigeneid:885844	sigF	Rv3605c	psi-mi:"MI:0914"(association)	psi-mi:"0402"	IEP	PMID: 17158685	Rodrigue S (2007)	taxid:83332 (Mycobacterium tuberculosis)	taxid:83332 (Mycobacterium tuberculosis)	0	IPW-Rv3605c-Rv3286c	Anup Shah|darhngu@gmail.com
tuberculist:Rv3871	tuberculist:Rv3869	ncbigeneid:886202	ncbigeneid:886166	eccCb1	eccB1	psi-mi:"MI:0914"(association)	psi-mi:"0255"	IMP	PMID: 18974091|PMID: 16368961	Luthra A (2008)|Brodin P (2006)	taxid:83332 (Mycobacterium tuberculosis)	taxid:83332 (Mycobacterium tuberculosis)	0	IPW-Rv3869-Rv3871	anupam mondal|shahanup86@gmail.com
tuberculist:Rv3871	tuberculist:Rv3870	ncbigeneid:886202	ncbigeneid:886204	eccCb1	eccCa1	psi-mi:"MI:0914"(association)	psi-mi:"0255"	IMP	PMID: 16973880|PMID: 16368961	Champion PA (2006)|Brodin P (2006)	taxid:83332 (Mycobacterium tuberculosis)	taxid:83332 (Mycobacterium tuberculosis)	0	IPW-Rv3870-Rv3871	anupam mondal|shahanup86@gmail.com
tuberculist:Rv3871	tuberculist:Rv3869	ncbigeneid:886202	ncbigeneid:886166	eccCb1	eccB1	psi-mi:"MI:0914"(association)	psi-mi:"0255"	IMP	PMID: 16368961|PMID: 16973880|PMID: 18974091	Brodin P (2006)|Champion PA (2006)|Luthra A (2008)	taxid:83332 (Mycobacterium tuberculosis)	taxid:83332 (Mycobacterium tuberculosis)	0	IPW-Rv3871-Rv3869	anupam mondal|shahanup86@gmail.com
tuberculist:Rv3871	tuberculist:Rv3870	ncbigeneid:886202	ncbigeneid:886204	eccCb1	eccCa1	psi-mi:"MI:0914"(association)	psi-mi:"0255"	IMP	PMID: 16368961|PMID: 16973880|PMID: 18974091	Brodin P (2006)|Champion PA (2006)|Luthra A (2008)	taxid:83332 (Mycobacterium tuberculosis)	taxid:83332 (Mycobacterium tuberculosis)	0	IPW-Rv3871-Rv3870	anupam mondal|shahanup86@gmail.com
tuberculist:Rv3871	tuberculist:Rv3877	ncbigeneid:886202	ncbigeneid:886207	eccCb1	eccD1	psi-mi:"MI:0914"(association)	psi-mi:"0255"	IMP	PMID: 16368961|PMID: 16973880|PMID: 18974091	Brodin P (2006)|Champion PA (2006)|Luthra A (2008)	taxid:83332 (Mycobacterium tuberculosis)	taxid:83332 (Mycobacterium tuberculosis)	0	IPW-Rv3871-Rv3877	anupam mondal|shahanup86@gmail.com
tuberculist:Rv3871	tuberculist:Rv3874	ncbigeneid:886202	ncbigeneid:886194	eccCb1	esxB|cfp10	psi-mi:"MI:0914"(association)	psi-mi:"0400"|psi-mi:"0255"|psi-mi:"0013"	IDA|IMP|IEP	PMID: 11940590|PMID: 18974091|PMID: 15060053|PMID: 16368961|PMID: 16973880|PMID: 16844784|PMID: 15657139	Renshaw PS (2002)|Luthra A (2008)|Okkels LM (2004)|Brodin P (2006)|Champion PA (2006)|Singh A (2006)|Burts ML (2005)	taxid:83332 (Mycobacterium tuberculosis)	taxid:83332 (Mycobacterium tuberculosis)	0	IPW-Rv3874-Rv3871	anupam mondal|shahanup86@gmail.com
tuberculist:Rv3874	tuberculist:Rv0686	ncbigeneid:886194	ncbigeneid:888271	esxB|cfp10	Rv0686	psi-mi:"MI:0914"(association)	psi-mi:"0045"	IPI	PMID: 16844784	Singh A (2006)	taxid:83332 (Mycobacterium tuberculosis)	taxid:83332 (Mycobacterium tuberculosis)	0	IPW-Rv0686-Rv3874	anupam mondal|sudhakar_dipu@rediffmail.com
tuberculist:Rv3874	tuberculist:Rv1038c	ncbigeneid:886194	ncbigeneid:888372	esxB|cfp10	esxJ	psi-mi:"MI:0914"(association)	psi-mi:"0013"	IDA	PMID: 18430736	Lightbody KL (2008)	taxid:83332 (Mycobacterium tuberculosis)	taxid:83332 (Mycobacterium tuberculosis)	0	IPW-Rv1038c-Rv3874	akanksha jain|raj252000@yahoo.com
tuberculist:Rv3874	tuberculist:Rv2151c	ncbigeneid:886194	ncbigeneid:888367	esxB|cfp10	ftsQ	psi-mi:"MI:0914"(association)	psi-mi:"0686"	0	PMID: 20066037	Sureka K (2010)	taxid:83332 (Mycobacterium tuberculosis)	taxid:83332 (Mycobacterium tuberculosis)	0	IPW-Rv2151c-Rv3874	Priyanka Priyadarshini
tuberculist:Rv3874	tuberculist:Rv2240c	ncbigeneid:886194	ncbigeneid:888600	esxB|cfp10	Rv2240c	psi-mi:"MI:0914"(association)	psi-mi:"0686"	0			taxid:83332 (Mycobacterium tuberculosis)	taxid:83332 (Mycobacterium tuberculosis)	0	IPW-Rv2240c-Rv3874	Priyanka Priyadarshini
tuberculist:Rv3874	tuberculist:Rv2916c	ncbigeneid:886194	ncbigeneid:888242	esxB|cfp10	ffh	psi-mi:"MI:0914"(association)	psi-mi:"0686"	0			taxid:83332 (Mycobacterium tuberculosis)	taxid:83332 (Mycobacterium tuberculosis)	0	IPW-Rv2916c-Rv3874	Anup Shah
tuberculist:Rv3874	tuberculist:Rv3596c	ncbigeneid:886194	ncbigeneid:885104	esxB|cfp10	clpC1	psi-mi:"MI:0914"(association)	psi-mi:"0255"	RCA	PMID: 16844784	Singh A (2006)	taxid:83332 (Mycobacterium tuberculosis)	taxid:83332 (Mycobacterium tuberculosis)	0	IPW-Rv3596c-Rv3874	Anup Shah|darhngu@gmail.com
tuberculist:Rv3874	tuberculist:Rv3620c	ncbigeneid:886194	ncbigeneid:885787	esxB|cfp10	esxW	psi-mi:"MI:0914"(association)	psi-mi:"0045"	ISO	PMID: 11973144|PMID: 18723613	Pallen MJ (2002)|Garufi G (2008)	taxid:83332 (Mycobacterium tuberculosis)	taxid:83332 (Mycobacterium tuberculosis)	0	IPW-Rv3620c-Rv3874	Priyanka Priyadarshini|sourish10@gmail.com|ahal4789@gmail.com
tuberculist:Rv3874	tuberculist:Rv3800c	ncbigeneid:886194	ncbigeneid:886133	esxB|cfp10	pks13	psi-mi:"MI:0914"(association)	psi-mi:"0686"	0	PMID: 14695899|PMID: 16844784|PMID: 15653820|PMID: 19436070	Portevin D (2004)|Singh A (2006)|Takayama K (2005)|Gavalda S (2009)	taxid:83332 (Mycobacterium tuberculosis)	taxid:83332 (Mycobacterium tuberculosis)	0	IPW-Rv3800c-Rv3874	anupam mondal
tuberculist:Rv3874	tuberculist:Rv3868	ncbigeneid:886194	ncbigeneid:886199	esxB|cfp10	eccA1	psi-mi:"MI:0914"(association)	psi-mi:"0255"	IMP	PMID: 18974091|PMID: 16973880|PMID: 16368961	Luthra A (2008)|Champion PA (2006)|Brodin P (2006)	taxid:83332 (Mycobacterium tuberculosis)	taxid:83332 (Mycobacterium tuberculosis)	0	IPW-Rv3868-Rv3874	anupam mondal|shahanup86@gmail.com
tuberculist:Rv3874	tuberculist:Rv3872	ncbigeneid:886194	ncbigeneid:886191	esxB|cfp10	PE35	psi-mi:"MI:0914"(association)	psi-mi:"0255"	IMP	PMID: 16368961|PMID: 16973880|PMID: 18974091	Brodin P (2006)|Champion PA (2006)|Luthra A (2008)	taxid:83332 (Mycobacterium tuberculosis)	taxid:83332 (Mycobacterium tuberculosis)	0	IPW-Rv3872-Rv3874	anupam mondal|shahanup86@gmail.com
tuberculist:Rv3874	tuberculist:Rv2151c	ncbigeneid:886194	ncbigeneid:888367	esxB|cfp10	ftsQ	psi-mi:"MI:0914"(association)	psi-mi:"0686"	0	PMID: 11940590|PMID: 18974091|PMID: 15060053|PMID: 16368961|PMID: 16973880|PMID: 16844784|PMID: 15657139	Renshaw PS (2002)|Luthra A (2008)|Okkels LM (2004)|Brodin P (2006)|Champion PA (2006)|Singh A (2006)|Burts ML (2005)	taxid:83332 (Mycobacterium tuberculosis)	taxid:83332 (Mycobacterium tuberculosis)	0	IPW-Rv3874-Rv2151c	anupam mondal
tuberculist:Rv3874	tuberculist:Rv3871	ncbigeneid:886194	ncbigeneid:886202	esxB|cfp10	eccCb1	psi-mi:"MI:0914"(association)	psi-mi:"0400"|psi-mi:"0255"|psi-mi:"0013"	IDA|IMP|IEP	PMID: 11940590|PMID: 18974091|PMID: 15060053|PMID: 16368961|PMID: 16973880|PMID: 16844784|PMID: 15657139	Renshaw PS (2002)|Luthra A (2008)|Okkels LM (2004)|Brodin P (2006)|Champion PA (2006)|Singh A (2006)|Burts ML (2005)	taxid:83332 (Mycobacterium tuberculosis)	taxid:83332 (Mycobacterium tuberculosis)	0	IPW-Rv3874-Rv3871	anupam mondal|shahanup86@gmail.com
tuberculist:Rv3874	tuberculist:Rv3872	ncbigeneid:886194	ncbigeneid:886191	esxB|cfp10	PE35	psi-mi:"MI:0914"(association)	psi-mi:"0400"|psi-mi:"0255"|psi-mi:"0013"	IDA|IMP|IEP	PMID: 11940590|PMID: 18974091|PMID: 15060053|PMID: 16368961|PMID: 16973880|PMID: 16844784|PMID: 15657139	Renshaw PS (2002)|Luthra A (2008)|Okkels LM (2004)|Brodin P (2006)|Champion PA (2006)|Singh A (2006)|Burts ML (2005)	taxid:83332 (Mycobacterium tuberculosis)	taxid:83332 (Mycobacterium tuberculosis)	0	IPW-Rv3874-Rv3872	anupam mondal|shahanup86@gmail.com
tuberculist:Rv3874	tuberculist:Rv3875	ncbigeneid:886194	ncbigeneid:886209	esxB|cfp10	esxA	psi-mi:"MI:0914"(association)	psi-mi:"0400"	IPI	PMID: 11940590|PMID: 18974091|PMID: 15060053|PMID: 16368961|PMID: 16973880|PMID: 16844784|PMID: 15657139	Renshaw PS (2002)|Luthra A (2008)|Okkels LM (2004)|Brodin P (2006)|Champion PA (2006)|Singh A (2006)|Burts ML (2005)	taxid:83332 (Mycobacterium tuberculosis)	taxid:83332 (Mycobacterium tuberculosis)	0	IPW-Rv3874-Rv3875	anupam mondal|shahanup86@gmail.com
tuberculist:Rv3874	tuberculist:Rv3875	ncbigeneid:886194	ncbigeneid:886209	esxB|cfp10	esxA	psi-mi:"MI:0914"(association)	psi-mi:"0400"	IPI	PMID: 18974091|PMID: 15060053|PMID: 11940590|PMID: 16844784|PMID: 16973880|PMID: 15657139|PMID: 16368961	Luthra A (2008)|Okkels LM (2004)|Renshaw PS (2002)|Singh A (2006)|Champion PA (2006)|Burts ML (2005)|Brodin P (2006)	taxid:83332 (Mycobacterium tuberculosis)	taxid:83332 (Mycobacterium tuberculosis)	0	IPW-Rv3875-Rv3874	anupam mondal|shahanup86@gmail.com
tuberculist:Rv3874	tuberculist:Rv3876	ncbigeneid:886194	ncbigeneid:886206	esxB|cfp10	espI	psi-mi:"MI:0914"(association)	psi-mi:"0400"	IPI	PMID: 16368961|PMID: 19854905	Brodin P (2006)|Callahan B (2010)	taxid:83332 (Mycobacterium tuberculosis)	taxid:83332 (Mycobacterium tuberculosis)	0	IPW-Rv3876-Rv3874	anupam mondal|sourish10@gmail.com
tuberculist:Rv3911	tuberculist:Rv0035	ncbigeneid:886246	ncbigeneid:887048	Rv3911	fadD34	psi-mi:"MI:0914"(association)	psi-mi:"0255"	IEP	PMID: 17088352	Agarwal N (2007)	taxid:83332 (Mycobacterium tuberculosis)	taxid:83332 (Mycobacterium tuberculosis)	0	IPW-Rv0035-Rv3911	Priti Vishnoi|priti.priety@gmail.com
tuberculist:Rv3911	tuberculist:Rv0096	ncbigeneid:886246	ncbigeneid:886938	Rv3911	PPE1	psi-mi:"MI:0914"(association)	psi-mi:"0255"	IEP	PMID: 17942407|PMID: 12777483|PMID: 17524985|PMID: 17158685|PMID: 17028284	King-Scott J (2007)|Parish T (2003)|Wang F (2007)|Rodrigue S (2007)|Raman S (2006)	taxid:83332 (Mycobacterium tuberculosis)	taxid:83332 (Mycobacterium tuberculosis)	0	IPW-Rv0096-Rv3911	Ashwini Bhat|ashwinigbhat@gmail.com
tuberculist:Rv3911	tuberculist:Rv0097	ncbigeneid:886246	ncbigeneid:886942	Rv3911	Rv0097	psi-mi:"MI:0914"(association)	psi-mi:"0255"	IEP	PMID: 12777483|PMID: 17942407|PMID: 17524985|PMID: 9287300|PMID: 17028284	Parish T (2003)|King-Scott J (2007)|Wang F (2007)|Eichhorn E (1997)|Raman S (2006)	taxid:83332 (Mycobacterium tuberculosis)	taxid:83332 (Mycobacterium tuberculosis)	0	IPW-Rv0097-Rv3911	Ashwini Bhat|ashwinigbhat@gmail.com
tuberculist:Rv3911	tuberculist:Rv0098	ncbigeneid:886246	ncbigeneid:886935	Rv3911	fcoT	psi-mi:"MI:0914"(association)	psi-mi:"0255"	IEP	PMID: 17524985|PMID: 12777483|PMID: 17028284|PMID: 17942407	Wang F (2007)|Parish T (2003)|Raman S (2006)|King-Scott J (2007)	taxid:83332 (Mycobacterium tuberculosis)	taxid:83332 (Mycobacterium tuberculosis)	0	IPW-Rv0098-Rv3911	Ashwini Bhat|ashwinigbhat@gmail.com
tuberculist:Rv3911	tuberculist:Rv0099	ncbigeneid:886246	ncbigeneid:886933	Rv3911	fadD10	psi-mi:"MI:0914"(association)	psi-mi:"0255"	IEP	PMID: 17524985|PMID: 19182784|PMID: 17028284|PMID: 12777483|PMID: 17942407	Wang F (2007)|Arora P (2009)|Raman S (2006)|Parish T (2003)|King-Scott J (2007)	taxid:83332 (Mycobacterium tuberculosis)	taxid:83332 (Mycobacterium tuberculosis)	0	IPW-Rv0099-Rv3911	Ashwini Bhat|ashwinigbhat@gmail.com
tuberculist:Rv3911	tuberculist:Rv0100	ncbigeneid:886246	ncbigeneid:886931	Rv3911	Rv0100	psi-mi:"MI:0914"(association)	psi-mi:"0255"	IEP	PMID: 12777483|PMID: 17942407|PMID: 17028284|PMID: 17524985	Parish T (2003)|King-Scott J (2007)|Raman S (2006)|Wang F (2007)	taxid:83332 (Mycobacterium tuberculosis)	taxid:83332 (Mycobacterium tuberculosis)	0	IPW-Rv0100-Rv3911	Ashwini Bhat|ashwinigbhat@gmail.com
tuberculist:Rv3911	tuberculist:Rv0101	ncbigeneid:886246	ncbigeneid:886951	Rv3911	nrp	psi-mi:"MI:0914"(association)	psi-mi:"0255"	IEP	PMID: 17524985|PMID: 17942407|PMID: 12777483|PMID: 17028284	Wang F (2007)|King-Scott J (2007)|Parish T (2003)|Raman S (2006)	taxid:83332 (Mycobacterium tuberculosis)	taxid:83332 (Mycobacterium tuberculosis)	0	IPW-Rv0101-Rv3911	Ashwini Bhat|gaurisd10@gmail.com
tuberculist:Rv3911	tuberculist:Rv0237	ncbigeneid:886246	ncbigeneid:886693	Rv3911	lpqI	psi-mi:"MI:0914"(association)	psi-mi:"0255"	IEP	PMID: 15539077|PMID: 17028284	Sutcliffe IC (2004)|Raman S (2006)	taxid:83332 (Mycobacterium tuberculosis)	taxid:83332 (Mycobacterium tuberculosis)	0	IPW-Rv0237-Rv3911	anupam mondal|sourish10@gmail.com
tuberculist:Rv3911	tuberculist:Rv0313	ncbigeneid:886246	ncbigeneid:886572	Rv3911	Rv0313	psi-mi:"MI:0914"(association)	psi-mi:"0255"	NAS	PMID: 17088352	Agarwal N (2007)	taxid:83332 (Mycobacterium tuberculosis)	taxid:83332 (Mycobacterium tuberculosis)	0	IPW-Rv0313-Rv3911	Priyanka Priyadarshini|vizhi.gurusamy@gmail.com
tuberculist:Rv3911	tuberculist:Rv0479c	ncbigeneid:886246	ncbigeneid:885535	Rv3911	Rv0479c	psi-mi:"MI:0914"(association)	psi-mi:"0255"	IEP	PMID: 17088352|PMID: 18657035	Agarwal N (2007)|Fontan PA (2008)	taxid:83332 (Mycobacterium tuberculosis)	taxid:83332 (Mycobacterium tuberculosis)	0	IPW-Rv0479c-Rv3911	anupam mondal|sourish10@gmail.com
tuberculist:Rv3911	tuberculist:Rv3092c	ncbigeneid:886246	ncbigeneid:888667	Rv3911	Rv3092c	psi-mi:"MI:0914"(association)	psi-mi:"0255"	IEP	PMID: 17088352	Agarwal N (2007)	taxid:83332 (Mycobacterium tuberculosis)	taxid:83332 (Mycobacterium tuberculosis)	0	IPW-Rv3092c-Rv3911	Anup Shah|shahanup86@gmail.com
tuberculist:Rv3911	tuberculist:Rv3093c	ncbigeneid:886246	ncbigeneid:888663	Rv3911	Rv3093c	psi-mi:"MI:0914"(association)	psi-mi:"0255"	IEP	PMID: 7356469|PMID: 8703001|PMID: 17088352	Kosower EM (1980)|Fisher AJ (1996)|Agarwal N (2007)	taxid:83332 (Mycobacterium tuberculosis)	taxid:83332 (Mycobacterium tuberculosis)	0	IPW-Rv3093c-Rv3911	Anup Shah|shahanup86@gmail.com
tuberculist:Rv3911	tuberculist:Rv3095	ncbigeneid:886246	ncbigeneid:888679	Rv3911	Rv3095	psi-mi:"MI:0914"(association)	psi-mi:"0255"	IEP	PMID: 15978081|PMID: 17088352	Yurimoto H (2005)|Agarwal N (2007)	taxid:83332 (Mycobacterium tuberculosis)	taxid:83332 (Mycobacterium tuberculosis)	0	IPW-Rv3095-Rv3911	Anup Shah|shahanup86@gmail.com
tuberculist:Rv3911	tuberculist:Rv3235	ncbigeneid:886246	ncbigeneid:888862	Rv3911	Rv3235	psi-mi:"MI:0914"(association)	psi-mi:"0255"	IEP	PMID: 17028284	Raman S (2006)	taxid:83332 (Mycobacterium tuberculosis)	taxid:83332 (Mycobacterium tuberculosis)	0	IPW-Rv3235-Rv3911	anupam mondal|sourish10@gmail.com
tuberculist:Rv3911	tuberculist:Rv3439c	ncbigeneid:886246	ncbigeneid:887565	Rv3911	Rv3439c	psi-mi:"MI:0914"(association)	psi-mi:"0255"	IEP	PMID: 17088352	Agarwal N (2007)	taxid:83332 (Mycobacterium tuberculosis)	taxid:83332 (Mycobacterium tuberculosis)	0	IPW-Rv3439c-Rv3911	akanksha jain|ranjeetsingh@live.in
tuberculist:Rv3911	tuberculist:Rv3440c	ncbigeneid:886246	ncbigeneid:887592	Rv3911	Rv3440c	psi-mi:"MI:0914"(association)	psi-mi:"0255"	IEP	PMID: 17088352	Agarwal N (2007)	taxid:83332 (Mycobacterium tuberculosis)	taxid:83332 (Mycobacterium tuberculosis)	0	IPW-Rv3440c-Rv3911	akanksha jain|chirupolo@gmail.com
tuberculist:Rv3911	tuberculist:Rv3442c	ncbigeneid:886246	ncbigeneid:887488	Rv3911	rpsI	psi-mi:"MI:0914"(association)	psi-mi:"0255"	NAS	PMID: 17028284	Raman S (2006)	taxid:83332 (Mycobacterium tuberculosis)	taxid:83332 (Mycobacterium tuberculosis)	0	IPW-Rv3442c-Rv3911	Priyanka Priyadarshini|priyadarshinipriyanka2001@gmail.com
tuberculist:Rv3911	tuberculist:Rv3443c	ncbigeneid:886246	ncbigeneid:887584	Rv3911	rplM	psi-mi:"MI:0914"(association)	psi-mi:"0255"	NAS	PMID: 17028284	Raman S (2006)	taxid:83332 (Mycobacterium tuberculosis)	taxid:83332 (Mycobacterium tuberculosis)	0	IPW-Rv3443c-Rv3911	Priyanka Priyadarshini|priyadarshinipriyanka2001@gmail.com
tuberculist:Rv3911	tuberculist:Rv3444c	ncbigeneid:886246	ncbigeneid:887587	Rv3911	esxT	psi-mi:"MI:0914"(association)	psi-mi:"0255"	IEP	PMID: 17088352	Agarwal N (2007)	taxid:83332 (Mycobacterium tuberculosis)	taxid:83332 (Mycobacterium tuberculosis)	0	IPW-Rv3444c-Rv3911	akanksha jain|chirupolo@gmail.com
tuberculist:Rv3911	tuberculist:Rv3445c	ncbigeneid:886246	ncbigeneid:887585	Rv3911	esxU	psi-mi:"MI:0914"(association)	psi-mi:"0255"	IEP	PMID: 17088352	Agarwal N (2007)	taxid:83332 (Mycobacterium tuberculosis)	taxid:83332 (Mycobacterium tuberculosis)	0	IPW-Rv3445c-Rv3911	akanksha jain|diponlove@hotmail.com
tuberculist:Rv3911	tuberculist:Rv3447c	ncbigeneid:886246	ncbigeneid:887581	Rv3911	eccC4	psi-mi:"MI:0914"(association)	psi-mi:"0255"	IEP	PMID: 17088352	Agarwal N (2007)	taxid:83332 (Mycobacterium tuberculosis)	taxid:83332 (Mycobacterium tuberculosis)	0	IPW-Rv3447c-Rv3911	Anup Shah|yashabhasin@gmail.com
tuberculist:Rv3911	tuberculist:Rv3448	ncbigeneid:886246	ncbigeneid:887624	Rv3911	eccD4	psi-mi:"MI:0914"(association)	psi-mi:"0255"	IEP	PMID: 17088352	Agarwal N (2007)	taxid:83332 (Mycobacterium tuberculosis)	taxid:83332 (Mycobacterium tuberculosis)	0	IPW-Rv3448-Rv3911	Anup Shah|yashabhasin@gmail.com
tuberculist:Rv3911	tuberculist:Rv3449	ncbigeneid:886246	ncbigeneid:887602	Rv3911	mycP4	psi-mi:"MI:0914"(association)	psi-mi:"0255"	IEP	PMID: 12366866|PMID: 17088352|PMID: 10974545	Dave JA (2002)|Agarwal N (2007)|Brown GD (2000)	taxid:83332 (Mycobacterium tuberculosis)	taxid:83332 (Mycobacterium tuberculosis)	0	IPW-Rv3449-Rv3911	akanksha jain|harsharohiratruefriend@gmail.com
tuberculist:Rv3911	tuberculist:Rv3904c	ncbigeneid:886246	ncbigeneid:886237	Rv3911	esxE	psi-mi:"MI:0914"(association)	psi-mi:"0255"	IEP	PMID: 11669220|PMID: 17088352|PMID: 11940590|PMID: 11973144	Louise R (2001)|Agarwal N (2007)|Renshaw PS (2002)|Pallen MJ (2002)	taxid:83332 (Mycobacterium tuberculosis)	taxid:83332 (Mycobacterium tuberculosis)	0	IPW-Rv3904c-Rv3911	anupam mondal|sourish10@gmail.com
tuberculist:Rv3911	tuberculist:Rv3905c	ncbigeneid:886246	ncbigeneid:886239	Rv3911	esxF	psi-mi:"MI:0914"(association)	psi-mi:"0255"	IEP	PMID: 11973144|PMID: 11669220|PMID: 11940590|PMID: 17088352	Pallen MJ (2002)|Louise R (2001)|Renshaw PS (2002)|Agarwal N (2007)	taxid:83332 (Mycobacterium tuberculosis)	taxid:83332 (Mycobacterium tuberculosis)	0	IPW-Rv3905c-Rv3911	anupam mondal|sourish10@gmail.com
tuberculist:Rv3911	tuberculist:Rv3906c	ncbigeneid:886246	ncbigeneid:886221	Rv3911	Rv3906c	psi-mi:"MI:0914"(association)	psi-mi:"0255"	IEP	PMID: 11973144|PMID: 17088352|PMID: 11669220|PMID: 11940590	Pallen MJ (2002)|Agarwal N (2007)|Louise R (2001)|Renshaw PS (2002)	taxid:83332 (Mycobacterium tuberculosis)	taxid:83332 (Mycobacterium tuberculosis)	0	IPW-Rv3906c-Rv3911	anupam mondal|sourish10@gmail.com
tuberculist:Rv3911	tuberculist:Rv3444c	ncbigeneid:886246	ncbigeneid:887587	Rv3911	esxT	psi-mi:"MI:0914"(association)	psi-mi:"0255"	IEP	PMID: 17088352|PMID: 17028284|PMID: 10027986	Agarwal N (2007)|Raman S (2006)|Manganelli R (1999)	taxid:83332 (Mycobacterium tuberculosis)	taxid:83332 (Mycobacterium tuberculosis)	0	IPW-Rv3911-Rv3444c	akanksha jain
tuberculist:Rv3911	tuberculist:Rv3445c	ncbigeneid:886246	ncbigeneid:887585	Rv3911	esxU	psi-mi:"MI:0914"(association)	psi-mi:"0255"	IEP	PMID: 17088352|PMID: 17028284|PMID: 10027986	Agarwal N (2007)|Raman S (2006)|Manganelli R (1999)	taxid:83332 (Mycobacterium tuberculosis)	taxid:83332 (Mycobacterium tuberculosis)	0	IPW-Rv3911-Rv3445c	akanksha jain
tuberculist:Rv3911	tuberculist:Rv3904c	ncbigeneid:886246	ncbigeneid:886237	Rv3911	esxE	psi-mi:"MI:0914"(association)	psi-mi:"0255"	IEP	PMID: 17088352|PMID: 17028284|PMID: 10027986	Agarwal N (2007)|Raman S (2006)|Manganelli R (1999)	taxid:83332 (Mycobacterium tuberculosis)	taxid:83332 (Mycobacterium tuberculosis)	0	IPW-Rv3911-Rv3904c	akanksha jain
tuberculist:Rv3911	tuberculist:Rv3905c	ncbigeneid:886246	ncbigeneid:886239	Rv3911	esxF	psi-mi:"MI:0914"(association)	psi-mi:"0255"	IEP	PMID: 17088352|PMID: 17028284|PMID: 10027986	Agarwal N (2007)|Raman S (2006)|Manganelli R (1999)	taxid:83332 (Mycobacterium tuberculosis)	taxid:83332 (Mycobacterium tuberculosis)	0	IPW-Rv3911-Rv3905c	akanksha jain
tuberculist:Rv3911	tuberculist:Rv3912	ncbigeneid:886246	ncbigeneid:886234	Rv3911	RsmA	psi-mi:"MI:0914"(association)	psi-mi:"0255"	IEP	PMID: 20545848	Sklar JG (2010)	taxid:83332 (Mycobacterium tuberculosis)	taxid:83332 (Mycobacterium tuberculosis)	0	IPW-Rv3912-Rv3911	anupam mondal|sourish10@gmail.com

## Sheet: Rv0014c
tuberculist:Rv0014c	tuberculist:Rv0014c	ncbigeneid:887072	ncbigeneid:887072	pknB	pknB	psi-mi:"MI:0914"(association)	psi-mi:"0013"	IDA	PMID: 17148687|PMID: 15978616|PMID: 18728196|PMID: 16436437|PMID: 15985609	Narayan A (2007)|Villarino A (2005)|Park ST (2008)|Dasgupta A (2006)|Kang CM (2005)	taxid:83332 (Mycobacterium tuberculosis)	taxid:83332 (Mycobacterium tuberculosis)	0	IPW-Rv0014c-Rv0014c	akanksha jain
tuberculist:Rv0014c	tuberculist:Rv0015c	ncbigeneid:887072	ncbigeneid:885953	pknB	pknA	psi-mi:"MI:0914"(association)	psi-mi:"0400"|psi-mi:"0013"	IPI|IDA	PMID: 17148687|PMID: 15978616|PMID: 18728196|PMID: 16436437|PMID: 15985609	Narayan A (2007)|Villarino A (2005)|Park ST (2008)|Dasgupta A (2006)|Kang CM (2005)	taxid:83332 (Mycobacterium tuberculosis)	taxid:83332 (Mycobacterium tuberculosis)	0	IPW-Rv0014c-Rv0015c	akanksha jain|vmevada102@gmail.com
tuberculist:Rv0014c	tuberculist:Rv0016c	ncbigeneid:887072	ncbigeneid:887078	pknB	pbpA	psi-mi:"MI:0914"(association)	psi-mi:"0255"	IEP	PMID: 17148687|PMID: 15978616|PMID: 18728196|PMID: 16436437|PMID: 15985609	Narayan A (2007)|Villarino A (2005)|Park ST (2008)|Dasgupta A (2006)|Kang CM (2005)	taxid:83332 (Mycobacterium tuberculosis)	taxid:83332 (Mycobacterium tuberculosis)	0	IPW-Rv0014c-Rv0016c	akanksha jain|vmevada102@gmail.com
tuberculist:Rv0014c	tuberculist:Rv1827	ncbigeneid:887072	ncbigeneid:885735	pknB	garA	psi-mi:"MI:0914"(association)	psi-mi:"0013"	IDA	PMID: 17148687|PMID: 15978616|PMID: 18728196|PMID: 16436437|PMID: 15985609	Narayan A (2007)|Villarino A (2005)|Park ST (2008)|Dasgupta A (2006)|Kang CM (2005)	taxid:83332 (Mycobacterium tuberculosis)	taxid:83332 (Mycobacterium tuberculosis)	0	IPW-Rv0014c-Rv1827	anupam mondal|madhulsbu@gmail.com
tuberculist:Rv0014c	tuberculist:Rv3221A	ncbigeneid:887072	ncbigeneid:3205091	pknB	rshA	psi-mi:"MI:0914"(association)	psi-mi:"0400"	IPI	PMID: 17148687|PMID: 15978616|PMID: 18728196|PMID: 16436437|PMID: 15985609	Narayan A (2007)|Villarino A (2005)|Park ST (2008)|Dasgupta A (2006)|Kang CM (2005)	taxid:83332 (Mycobacterium tuberculosis)	taxid:83332 (Mycobacterium tuberculosis)	0	IPW-Rv0014c-Rv3221A	akanksha jain
tuberculist:Rv0014c	tuberculist:Rv0015c	ncbigeneid:887072	ncbigeneid:885953	pknB	pknA	psi-mi:"MI:0914"(association)	psi-mi:"0255"	IEP	PMID: 15985609|PMID: 17148687|PMID: 18199749	Kang CM (2005)|Narayan A (2007)|Thakur M (2008)	taxid:83332 (Mycobacterium tuberculosis)	taxid:83332 (Mycobacterium tuberculosis)	0	IPW-Rv0015c-Rv0014c	Priyanka Priyadarshini|vmevada102@gmail.com
tuberculist:Rv0014c	tuberculist:Rv0016c	ncbigeneid:887072	ncbigeneid:887078	pknB	pbpA	psi-mi:"MI:0914"(association)	psi-mi:"0255"	IEP	PMID: 16436437	Dasgupta A (2006)	taxid:83332 (Mycobacterium tuberculosis)	taxid:83332 (Mycobacterium tuberculosis)	0	IPW-Rv0016c-Rv0014c	Priyanka Priyadarshini|vmevada102@gmail.com
tuberculist:Rv0014c	tuberculist:Rv0018c	ncbigeneid:887072	ncbigeneid:887070	pknB	pstP	psi-mi:"MI:0914"(association)	psi-mi:"0013"	IDA	PMID: 15530359|PMID: 12950916|PMID: 14575702	Pullen KE (2004)|Boitel B (2003)|Chopra P (2003)	taxid:83332 (Mycobacterium tuberculosis)	taxid:83332 (Mycobacterium tuberculosis)	0	IPW-Rv0018c-Rv0014c	Priyanka Priyadarshini|vmevada102@gmail.com
tuberculist:Rv0014c	tuberculist:Rv0019c	ncbigeneid:887072	ncbigeneid:887079	pknB	fhaB	psi-mi:"MI:0914"(association)	psi-mi:"0013"	IDA	PMID: 19826007	Gupta M (2009)	taxid:83332 (Mycobacterium tuberculosis)	taxid:83332 (Mycobacterium tuberculosis)	0	IPW-Rv0019c-Rv0014c	Priyanka Priyadarshini|vmevada102@gmail.com
tuberculist:Rv0014c	tuberculist:Rv0020c	ncbigeneid:887072	ncbigeneid:887067	pknB	fhaA	psi-mi:"MI:0914"(association)	psi-mi:"0400"	IEP	PMID: 15987910	Grundner C (2005)	taxid:83332 (Mycobacterium tuberculosis)	taxid:83332 (Mycobacterium tuberculosis)	0	IPW-Rv0020c-Rv0014c	Priyanka Priyadarshini|vmevada102@gmail.com
tuberculist:Rv0014c	tuberculist:Rv1018c	ncbigeneid:887072	ncbigeneid:886069	pknB	glmU	psi-mi:"MI:0914"(association)	psi-mi:"0013"	IDA	PMID: 18573680|PMID: 19121323	Zhang W (2008)|Parikh A (2009)	taxid:83332 (Mycobacterium tuberculosis)	taxid:83332 (Mycobacterium tuberculosis)	0	IPW-Rv1018c-Rv0014c	akanksha jain|priti.priety@gmail.com|ashwinigbhat@gmail.com
tuberculist:Rv0014c	tuberculist:Rv1222	ncbigeneid:887072	ncbigeneid:885196	pknB	rseA	psi-mi:"MI:0914"(association)	psi-mi:"0943"	IDA	PMID: 20025669|PMID: 18606740|PMID: 14761983	RseA (2010)|Dona V (2008)|Manganelli R (2004)	taxid:83332 (Mycobacterium tuberculosis)	taxid:83332 (Mycobacterium tuberculosis)	0	IPW-Rv1222-Rv0014c	Ashwini Bhat|harsharohiratruefriend@gmail.com
tuberculist:Rv0014c	tuberculist:Rv1422	ncbigeneid:887072	ncbigeneid:886670	pknB	Rv1422	psi-mi:"MI:0914"(association)	psi-mi:"0982"	RCA	PMID: 15985609	Kang CM (2005)	taxid:83332 (Mycobacterium tuberculosis)	taxid:83332 (Mycobacterium tuberculosis)	0	IPW-Rv1422-Rv0014c	Ashwini Bhat|shruti4rana@gmail.com
tuberculist:Rv0014c	tuberculist:Rv1436	ncbigeneid:887072	ncbigeneid:886632	pknB	gap	psi-mi:"MI:0914"(association)	psi-mi:"0013"	IDA	PMID: 10702355	Parker AE (2000)	taxid:83332 (Mycobacterium tuberculosis)	taxid:83332 (Mycobacterium tuberculosis)	0	IPW-Rv1436-Rv0014c	Anup Shah|yashabhasin@gmail.com
tuberculist:Rv0014c	tuberculist:Rv1827	ncbigeneid:887072	ncbigeneid:885735	pknB	garA	psi-mi:"MI:0914"(association)	psi-mi:"0013"	IDA	PMID: 19114043|PMID: 15978616	England P (2009)|Villarino A (2005)	taxid:83332 (Mycobacterium tuberculosis)	taxid:83332 (Mycobacterium tuberculosis)	0	IPW-Rv1827-Rv0014c	anupam mondal|madhulsbu@gmail.com
tuberculist:Rv0014c	tuberculist:Rv2145c	ncbigeneid:887072	ncbigeneid:888224	pknB	wag31|ag84	psi-mi:"MI:0914"(association)	psi-mi:"0400"	IMP	PMID: 18618175|PMID: 15985609|PMID: 19496931|PMID: 19932688|PMID: 7868268	Cao W (2008)|Kang CM (2005)|Mukherjee P (2009)|Hamasha K (2010)|Hermans PW (1995)	taxid:83332 (Mycobacterium tuberculosis)	taxid:83332 (Mycobacterium tuberculosis)	0	IPW-Rv2145c-Rv0014c	Anup Shah|harsharohiratruefriend@gmail.com
tuberculist:Rv0014c	tuberculist:Rv3223c	ncbigeneid:887072	ncbigeneid:888094	pknB	sigH	psi-mi:"MI:0914"(association)	psi-mi:"0255"	IEP|TAS	PMID: 19951358|PMID: 18728196|PMID: 11567012|PMID: 14617153	Sachdeva P (2010)|Park ST (2008)|Raman S (2001)|Song T (2003)	taxid:83332 (Mycobacterium tuberculosis)	taxid:83332 (Mycobacterium tuberculosis)	0	IPW-Rv3223c-Rv0014c	anupam mondal|sourish10@gmail.com

## Sheet: Rv0020c
tuberculist:Rv0020c	tuberculist:Rv0014c	ncbigeneid:887067	ncbigeneid:887072	fhaA	pknB	psi-mi:"MI:0914"(association)	psi-mi:"0400"	IEP	PMID: 15987910	Grundner C (2005)	taxid:83332 (Mycobacterium tuberculosis)	taxid:83332 (Mycobacterium tuberculosis)	0	IPW-Rv0020c-Rv0014c	Priyanka Priyadarshini|vmevada102@gmail.com
tuberculist:Rv0020c	tuberculist:Rv0931c	ncbigeneid:887067	ncbigeneid:885607	fhaA	pknD	psi-mi:"MI:0914"(association)	psi-mi:"0400"	IEP	PMID: 15987910	Grundner C (2005)	taxid:83332 (Mycobacterium tuberculosis)	taxid:83332 (Mycobacterium tuberculosis)	0	IPW-Rv0020c-Rv0931c	Priyanka Priyadarshini|vmevada102@gmail.com
tuberculist:Rv0020c	tuberculist:Rv1743	ncbigeneid:887067	ncbigeneid:885284	fhaA	pknE	psi-mi:"MI:0914"(association)	psi-mi:"0400"	IEP	PMID: 15987910	Grundner C (2005)	taxid:83332 (Mycobacterium tuberculosis)	taxid:83332 (Mycobacterium tuberculosis)	0	IPW-Rv0020c-Rv1743	Priyanka Priyadarshini|vmevada102@gmail.com
tuberculist:Rv0020c	tuberculist:Rv1746	ncbigeneid:887067	ncbigeneid:885275	fhaA	pknF	psi-mi:"MI:0914"(association)	psi-mi:"0400"	IEP	PMID: 15987910	Grundner C (2005)	taxid:83332 (Mycobacterium tuberculosis)	taxid:83332 (Mycobacterium tuberculosis)	0	IPW-Rv0020c-Rv1746	Priyanka Priyadarshini|vmevada102@gmail.com
tuberculist:Rv0020c	tuberculist:Rv0931c	ncbigeneid:887067	ncbigeneid:885607	fhaA	pknD	psi-mi:"MI:0914"(association)	psi-mi:"0400"	IEP	PMID: 16879801|PMID: 15136047|PMID: 15987910|PMID: 17411339|PMID: 7768349|PMID: 3291115	Perez J (2006)|Good MC (2004)|Grundner C (2005)|Greenstein AE (2007)|Hanks SK (1995)|Hanks SK (1988)	taxid:83332 (Mycobacterium tuberculosis)	taxid:83332 (Mycobacterium tuberculosis)	0	IPW-Rv0931c-Rv0020c	Priyanka Priyadarshini|priyadarshinipriyanka2001@gmail.com

## Sheet: Rv0516c
tuberculist:Rv0516c	tuberculist:Rv0931c	ncbigeneid:887324	ncbigeneid:885607	Rv0516c	pknD	psi-mi:"MI:0914"(association)	psi-mi:"0400"	IDA	PMID: 17485404|PMID: 16263329|PMID: 17411339	Dhandayuthapani S (2007)|Parida BK (2005)|Greenstein AE (2007)	taxid:83332 (Mycobacterium tuberculosis)	taxid:83332 (Mycobacterium tuberculosis)	0	IPW-Rv0516c-Rv0931c	Anup Shah|shahanup86@gmail.com
tuberculist:Rv0516c	tuberculist:Rv2638	ncbigeneid:887324	ncbigeneid:888156	Rv0516c	Rv2638	psi-mi:"MI:0914"(association)	psi-mi:"0255"	IDA	PMID: 17485404|PMID: 16263329|PMID: 17411339	Dhandayuthapani S (2007)|Parida BK (2005)|Greenstein AE (2007)	taxid:83332 (Mycobacterium tuberculosis)	taxid:83332 (Mycobacterium tuberculosis)	0	IPW-Rv0516c-Rv2638	anupam mondal|hibeeluck@gmail.com
tuberculist:Rv0516c	tuberculist:Rv3286c	ncbigeneid:887324	ncbigeneid:888727	Rv0516c	sigF	psi-mi:"MI:0914"(association)	psi-mi:"0045"	IPI	PMID: 17485404|PMID: 16263329|PMID: 17411339	Dhandayuthapani S (2007)|Parida BK (2005)|Greenstein AE (2007)	taxid:83332 (Mycobacterium tuberculosis)	taxid:83332 (Mycobacterium tuberculosis)	0	IPW-Rv0516c-Rv3286c	Anup Shah|yashabhasin@gmail.com
tuberculist:Rv0516c	tuberculist:Rv3287c	ncbigeneid:887324	ncbigeneid:887977	Rv0516c	rsbW|usfX	psi-mi:"MI:0914"(association)	psi-mi:"0255"	IDA	PMID: 17485404|PMID: 16263329|PMID: 17411339	Dhandayuthapani S (2007)|Parida BK (2005)|Greenstein AE (2007)	taxid:83332 (Mycobacterium tuberculosis)	taxid:83332 (Mycobacterium tuberculosis)	0	IPW-Rv0516c-Rv3287c	anupam mondal|hibeeluck@gmail.com
tuberculist:Rv0516c	tuberculist:Rv3687c	ncbigeneid:887324	ncbigeneid:885599	Rv0516c	rsfB	psi-mi:"MI:0914"(association)	psi-mi:"0255"	IDA	PMID: 17485404|PMID: 16263329|PMID: 17411339	Dhandayuthapani S (2007)|Parida BK (2005)|Greenstein AE (2007)	taxid:83332 (Mycobacterium tuberculosis)	taxid:83332 (Mycobacterium tuberculosis)	0	IPW-Rv0516c-Rv3687c	anupam mondal|hibeeluck@gmail.com
tuberculist:Rv0516c	tuberculist:Rv0931c	ncbigeneid:887324	ncbigeneid:885607	Rv0516c	pknD	psi-mi:"MI:0914"(association)	psi-mi:"0013"	IDA	PMID: 16879801|PMID: 15136047|PMID: 15987910|PMID: 17411339|PMID: 7768349|PMID: 3291115	Perez J (2006)|Good MC (2004)|Grundner C (2005)|Greenstein AE (2007)|Hanks SK (1995)|Hanks SK (1988)	taxid:83332 (Mycobacterium tuberculosis)	taxid:83332 (Mycobacterium tuberculosis)	0	IPW-Rv0931c-Rv0516c	Priyanka Priyadarshini|priyadarshinipriyanka2001@gmail.com
tuberculist:Rv0516c	tuberculist:Rv3286c	ncbigeneid:887324	ncbigeneid:888727	Rv0516c	sigF	psi-mi:"MI:0914"(association)	psi-mi:"0255"	IDA	PMID: 17485404|PMID: 12354223|PMID: 16263329|PMID: 17384187	Dhandayuthapani S (2007)|Beaucher J (2002)|Parida BK (2005)|Williams EP (2007)	taxid:83332 (Mycobacterium tuberculosis)	taxid:83332 (Mycobacterium tuberculosis)	0	IPW-Rv3286c-Rv0516c	anupam mondal|hibeeluck@gmail.com

## Sheet: Rv0757
tuberculist:Rv0757	tuberculist:Rv0440	ncbigeneid:888772	ncbigeneid:886354	phoP	groEL	psi-mi:"MI:0914"(association)	psi-mi:"0255"	IEP	PMID: 16326699|PMID: 18065544|PMID: 12730372|PMID: 18946503|PMID: 16573683|PMID: 18757548|PMID: 20421951|PMID: 18194076|PMID: 18835713|PMID: 17658950|PMID: 18065542	Gonzalo Asensio J (2006)|Sinha A (2008)|Sola-Landa A (2003)|Gonzalo-Asensio J (2008)|Walters SB (2006)|Gonzalo-Asensio J (2008)|Miller JL (2010)|Asensio JA (2008)|Ryndak M (2008)|Velmurugan K (2007)|Chesne-Seck ML (2008)	taxid:83332 (Mycobacterium tuberculosis)	taxid:83332 (Mycobacterium tuberculosis)	0	IPW-Rv0757-Rv0440	Anup Shah|singhpankaj2116@gmail.com
tuberculist:Rv0757	tuberculist:Rv0467	ncbigeneid:888772	ncbigeneid:886291	phoP	icl1	psi-mi:"MI:0914"(association)	psi-mi:"0255"	IEP	PMID: 16326699|PMID: 18065544|PMID: 12730372|PMID: 18946503|PMID: 16573683|PMID: 18757548|PMID: 20421951|PMID: 18194076|PMID: 18835713|PMID: 17658950|PMID: 18065542	Gonzalo Asensio J (2006)|Sinha A (2008)|Sola-Landa A (2003)|Gonzalo-Asensio J (2008)|Walters SB (2006)|Gonzalo-Asensio J (2008)|Miller JL (2010)|Asensio JA (2008)|Ryndak M (2008)|Velmurugan K (2007)|Chesne-Seck ML (2008)	taxid:83332 (Mycobacterium tuberculosis)	taxid:83332 (Mycobacterium tuberculosis)	0	IPW-Rv0757-Rv0467	Anup Shah|singhpankaj2116@gmail.com
tuberculist:Rv0757	tuberculist:Rv0758	ncbigeneid:888772	ncbigeneid:888775	phoP	phoR	psi-mi:"MI:0914"(association)	psi-mi:"0255"	IEP	PMID: 16326699|PMID: 18065544|PMID: 12730372|PMID: 18946503|PMID: 16573683|PMID: 18757548|PMID: 20421951|PMID: 18194076|PMID: 18835713|PMID: 17658950|PMID: 18065542	Gonzalo Asensio J (2006)|Sinha A (2008)|Sola-Landa A (2003)|Gonzalo-Asensio J (2008)|Walters SB (2006)|Gonzalo-Asensio J (2008)|Miller JL (2010)|Asensio JA (2008)|Ryndak M (2008)|Velmurugan K (2007)|Chesne-Seck ML (2008)	taxid:83332 (Mycobacterium tuberculosis)	taxid:83332 (Mycobacterium tuberculosis)	0	IPW-Rv0757-Rv0758	Anup Shah|singhpankaj2116@gmail.com
tuberculist:Rv0757	tuberculist:Rv2031c	ncbigeneid:888772	ncbigeneid:887579	phoP	hspX	psi-mi:"MI:0914"(association)	psi-mi:"0013"	IEP	PMID: 16326699|PMID: 18065544|PMID: 12730372|PMID: 18946503|PMID: 16573683|PMID: 18757548|PMID: 20421951|PMID: 18194076|PMID: 18835713|PMID: 17658950|PMID: 18065542	Gonzalo Asensio J (2006)|Sinha A (2008)|Sola-Landa A (2003)|Gonzalo-Asensio J (2008)|Walters SB (2006)|Gonzalo-Asensio J (2008)|Miller JL (2010)|Asensio JA (2008)|Ryndak M (2008)|Velmurugan K (2007)|Chesne-Seck ML (2008)	taxid:83332 (Mycobacterium tuberculosis)	taxid:83332 (Mycobacterium tuberculosis)	0	IPW-Rv0757-Rv2031c	Anup Shah|singhpankaj2116@gmail.com
tuberculist:Rv0757	tuberculist:Rv3151	ncbigeneid:888772	ncbigeneid:887540	phoP	nuoG	psi-mi:"MI:0914"(association)	psi-mi:"0400"	IMP	PMID: 16326699|PMID: 18065544|PMID: 12730372|PMID: 18946503|PMID: 16573683|PMID: 18757548|PMID: 20421951|PMID: 18194076|PMID: 18835713|PMID: 17658950|PMID: 18065542	Gonzalo Asensio J (2006)|Sinha A (2008)|Sola-Landa A (2003)|Gonzalo-Asensio J (2008)|Walters SB (2006)|Gonzalo-Asensio J (2008)|Miller JL (2010)|Asensio JA (2008)|Ryndak M (2008)|Velmurugan K (2007)|Chesne-Seck ML (2008)	taxid:83332 (Mycobacterium tuberculosis)	taxid:83332 (Mycobacterium tuberculosis)	0	IPW-Rv0757-Rv3151	Kausik Bhattacharyya|hibeeluck@gmail.com|jhum4u2006@gmail.com
tuberculist:Rv0757	tuberculist:Rv3881c	ncbigeneid:888772	ncbigeneid:886214	phoP	espB	psi-mi:"MI:0914"(association)	psi-mi:"0255"	IEP	PMID: 16326699|PMID: 18065544|PMID: 12730372|PMID: 18946503|PMID: 16573683|PMID: 18757548|PMID: 20421951|PMID: 18194076|PMID: 18835713|PMID: 17658950|PMID: 18065542	Gonzalo Asensio J (2006)|Sinha A (2008)|Sola-Landa A (2003)|Gonzalo-Asensio J (2008)|Walters SB (2006)|Gonzalo-Asensio J (2008)|Miller JL (2010)|Asensio JA (2008)|Ryndak M (2008)|Velmurugan K (2007)|Chesne-Seck ML (2008)	taxid:83332 (Mycobacterium tuberculosis)	taxid:83332 (Mycobacterium tuberculosis)	0	IPW-Rv0757-Rv3881c	Anup Shah|singhpankaj2116@gmail.com
tuberculist:Rv0757	tuberculist:Rv0758	ncbigeneid:888772	ncbigeneid:888775	phoP	phoR	psi-mi:"MI:0914"(association)	psi-mi:"0400"	IPI	PMID: 12730372|PMID: 18757548|PMID: 18065542|PMID: 16326699	Sola-Landa A (2003)|Gonzalo-Asensio J (2008)|Chesne-Seck ML (2008)|Gonzalo Asensio J (2006)	taxid:83332 (Mycobacterium tuberculosis)	taxid:83332 (Mycobacterium tuberculosis)	0	IPW-Rv0758-Rv0757	Anup Shah|yashabhasin@gmail.com
tuberculist:Rv0757	tuberculist:Rv0835	ncbigeneid:888772	ncbigeneid:885883	phoP	lpqQ	psi-mi:"MI:0914"(association)	psi-mi:"0255"	IMP	PMID: 16573683	Walters SB (2006)	taxid:83332 (Mycobacterium tuberculosis)	taxid:83332 (Mycobacterium tuberculosis)	0	IPW-Rv0835-Rv0757	anupam mondal|diponlove@hotmail.com
tuberculist:Rv0757	tuberculist:Rv1179c	ncbigeneid:888772	ncbigeneid:886083	phoP	Rv1179c	psi-mi:"MI:0914"(association)	psi-mi:"0255"	IEP	PMID: 16573683	Walters SB (2006)	taxid:83332 (Mycobacterium tuberculosis)	taxid:83332 (Mycobacterium tuberculosis)	0	IPW-Rv1179c-Rv0757	anupam mondal|ravirajsoni@gmail.com
tuberculist:Rv0757	tuberculist:Rv1518	ncbigeneid:888772	ncbigeneid:886451	phoP	Rv1518	psi-mi:"MI:0914"(association)	psi-mi:"0686"	0	PMID: 17122347|PMID: 16573683	Fujiwara N (2007)|Walters SB (2006)	taxid:83332 (Mycobacterium tuberculosis)	taxid:83332 (Mycobacterium tuberculosis)	0	IPW-Rv1518-Rv0757	akanksha jain|atulkatarkar@gmail.com
tuberculist:Rv0757	tuberculist:Rv2368c	ncbigeneid:888772	ncbigeneid:885998	phoP	phoH1	psi-mi:"MI:0914"(association)	psi-mi:"0400"	IPI	PMID: 17496102	Schaaf S (2007)	taxid:83332 (Mycobacterium tuberculosis)	taxid:83332 (Mycobacterium tuberculosis)	0	IPW-Rv2368c-Rv0757	anupam mondal|sourish10@gmail.com
tuberculist:Rv0757	tuberculist:Rv2396	ncbigeneid:888772	ncbigeneid:885517	phoP	PE_PGRS41	psi-mi:"MI:0914"(association)	psi-mi:"0400"	IPI	PMID: 15659067|PMID: 16573683|PMID: 16267303	Calamita H (2005)|Walters SB (2006)|Bai G (2005)	taxid:83332 (Mycobacterium tuberculosis)	taxid:83332 (Mycobacterium tuberculosis)	0	IPW-Rv2396-Rv0757	anupam mondal|sourish10@gmail.com
tuberculist:Rv0757	tuberculist:Rv2887	ncbigeneid:888772	ncbigeneid:888563	phoP	Rv2887	psi-mi:"MI:0914"(association)	psi-mi:"0255"	IEP	PMID: 18052041	Wang S (2007)	taxid:83332 (Mycobacterium tuberculosis)	taxid:83332 (Mycobacterium tuberculosis)	0	IPW-Rv2887-Rv0757	Anup Shah|shahanup86@gmail.com
tuberculist:Rv0757	tuberculist:Rv3151	ncbigeneid:888772	ncbigeneid:887540	phoP	nuoG	psi-mi:"MI:0914"(association)	psi-mi:"0400"	IMP	PMID: 786986|PMID: 20553485|PMID: 14741580|PMID: 20421951|PMID: 17906132|PMID: 18946503|PMID: 17658950|PMID: 17501996	Dancey GF (1976)|Meena LS (2010)|Friedrich T (2004)|Miller JL (2010)|Golby P (2007)|Gonzalo-Asensio J (2008)|Velmurugan K (2007)|Fu LM (2007)	taxid:83332 (Mycobacterium tuberculosis)	taxid:83332 (Mycobacterium tuberculosis)	0	IPW-Rv3151-Rv0757	Kausik Bhattacharyya|hibeeluck@gmail.com|jhum4u2006@gmail.com
tuberculist:Rv0757	tuberculist:Rv3426	ncbigeneid:888772	ncbigeneid:887622	phoP	PPE58	psi-mi:"MI:0914"(association)	psi-mi:"0255"	IEP	PMID: 16573683	Walters SB (2006)	taxid:83332 (Mycobacterium tuberculosis)	taxid:83332 (Mycobacterium tuberculosis)	0	IPW-Rv3426-Rv0757	akanksha jain|chirupolo@gmail.com
tuberculist:Rv0757	tuberculist:Rv3429	ncbigeneid:888772	ncbigeneid:887630	phoP	PPE59	psi-mi:"MI:0914"(association)	psi-mi:"0255"	IEP	PMID: 16573683|PMID: 18820012	Walters SB (2006)|Karboul A (2008)	taxid:83332 (Mycobacterium tuberculosis)	taxid:83332 (Mycobacterium tuberculosis)	0	IPW-Rv3429-Rv0757	akanksha jain
tuberculist:Rv0757	tuberculist:Rv3479	ncbigeneid:888772	ncbigeneid:888478	phoP	Rv3479	psi-mi:"MI:0914"(association)	psi-mi:"0255"	IEP	PMID: 18757548	Gonzalo-Asensio J (2008)	taxid:83332 (Mycobacterium tuberculosis)	taxid:83332 (Mycobacterium tuberculosis)	0	IPW-Rv3479-Rv0757	Anup Shah|raj252000@gmail.com
tuberculist:Rv0757	tuberculist:Rv3612c	ncbigeneid:888772	ncbigeneid:885381	phoP	Rv3612c	psi-mi:"MI:0914"(association)	psi-mi:"0686"	NAS	PMID: 16573683	Walters SB (2006)	taxid:83332 (Mycobacterium tuberculosis)	taxid:83332 (Mycobacterium tuberculosis)	0	IPW-Rv3612c-Rv0757	akanksha jain|darhngu@gmail.com
tuberculist:Rv0757	tuberculist:Rv3686c	ncbigeneid:888772	ncbigeneid:885306	phoP	Rv3686c	psi-mi:"MI:0914"(association)	psi-mi:"0686"	IEP	PMID: 18757548	Gonzalo-Asensio J (2008)	taxid:83332 (Mycobacterium tuberculosis)	taxid:83332 (Mycobacterium tuberculosis)	0	IPW-Rv3686c-Rv0757	akanksha jain|akankshajain.21@gmail.com
tuberculist:Rv0757	tuberculist:Rv3822	ncbigeneid:888772	ncbigeneid:886155	phoP	Rv3822	psi-mi:"MI:0914"(association)	psi-mi:"0255"	IEP	PMID: 16573683|PMID: 12711809	Walters SB (2006)|Adindla S (2003)	taxid:83332 (Mycobacterium tuberculosis)	taxid:83332 (Mycobacterium tuberculosis)	0	IPW-Rv3822-Rv0757	anupam mondal|sourish10@gmail.com
tuberculist:Rv0757	tuberculist:Rv3823c	ncbigeneid:888772	ncbigeneid:886145	phoP	mmpL8	psi-mi:"MI:0914"(association)	psi-mi:"0255"	IEP	PMID: 16573683|PMID: 12724526	Walters SB (2006)|Converse SE (2003)	taxid:83332 (Mycobacterium tuberculosis)	taxid:83332 (Mycobacterium tuberculosis)	0	IPW-Rv3823c-Rv0757	anupam mondal|sourish10@gamil.com
tuberculist:Rv0757	tuberculist:Rv3824c	ncbigeneid:888772	ncbigeneid:886156	phoP	papA1	psi-mi:"MI:0914"(association)	psi-mi:"0255"	IEP	PMID: 16573683|PMID: 17592143|PMID: 12711809	Walters SB (2006)|Kumar P (2007)|Adindla S (2003)	taxid:83332 (Mycobacterium tuberculosis)	taxid:83332 (Mycobacterium tuberculosis)	0	IPW-Rv3824c-Rv0757	anupam mondal|sourish10@gmail.com
tuberculist:Rv0757	tuberculist:Rv3825c	ncbigeneid:888772	ncbigeneid:886148	phoP	pks2	psi-mi:"MI:0914"(association)	psi-mi:"0255"	IEP	PMID: 12711809|PMID: 16573683|PMID: 12724526|PMID: 11278910	Adindla S (2003)|Walters SB (2006)|Converse SE (2003)|Sirakova TD (2001)	taxid:83332 (Mycobacterium tuberculosis)	taxid:83332 (Mycobacterium tuberculosis)	0	IPW-Rv3825c-Rv0757	anupam mondal|sourish10@gmail.com

## Sheet: Rv0931c
tuberculist:Rv0931c	tuberculist:Rv0020c	ncbigeneid:885607	ncbigeneid:887067	pknD	fhaA	psi-mi:"MI:0914"(association)	psi-mi:"0400"	IEP	PMID: 15987910	Grundner C (2005)	taxid:83332 (Mycobacterium tuberculosis)	taxid:83332 (Mycobacterium tuberculosis)	0	IPW-Rv0020c-Rv0931c	Priyanka Priyadarshini|vmevada102@gmail.com
tuberculist:Rv0931c	tuberculist:Rv0516c	ncbigeneid:885607	ncbigeneid:887324	pknD	Rv0516c	psi-mi:"MI:0914"(association)	psi-mi:"0400"	IDA	PMID: 17485404|PMID: 16263329|PMID: 17411339	Dhandayuthapani S (2007)|Parida BK (2005)|Greenstein AE (2007)	taxid:83332 (Mycobacterium tuberculosis)	taxid:83332 (Mycobacterium tuberculosis)	0	IPW-Rv0516c-Rv0931c	Anup Shah|shahanup86@gmail.com
tuberculist:Rv0931c	tuberculist:Rv0020c	ncbigeneid:885607	ncbigeneid:887067	pknD	fhaA	psi-mi:"MI:0914"(association)	psi-mi:"0400"	IEP	PMID: 16879801|PMID: 15136047|PMID: 15987910|PMID: 17411339|PMID: 7768349|PMID: 3291115	Perez J (2006)|Good MC (2004)|Grundner C (2005)|Greenstein AE (2007)|Hanks SK (1995)|Hanks SK (1988)	taxid:83332 (Mycobacterium tuberculosis)	taxid:83332 (Mycobacterium tuberculosis)	0	IPW-Rv0931c-Rv0020c	Priyanka Priyadarshini|priyadarshinipriyanka2001@gmail.com
tuberculist:Rv0931c	tuberculist:Rv0516c	ncbigeneid:885607	ncbigeneid:887324	pknD	Rv0516c	psi-mi:"MI:0914"(association)	psi-mi:"0013"	IDA	PMID: 16879801|PMID: 15136047|PMID: 15987910|PMID: 17411339|PMID: 7768349|PMID: 3291115	Perez J (2006)|Good MC (2004)|Grundner C (2005)|Greenstein AE (2007)|Hanks SK (1995)|Hanks SK (1988)	taxid:83332 (Mycobacterium tuberculosis)	taxid:83332 (Mycobacterium tuberculosis)	0	IPW-Rv0931c-Rv0516c	Priyanka Priyadarshini|priyadarshinipriyanka2001@gmail.com
tuberculist:Rv0931c	tuberculist:Rv0931c	ncbigeneid:885607	ncbigeneid:885607	pknD	pknD	psi-mi:"MI:0914"(association)	psi-mi:"0686"	0	PMID: 16879801|PMID: 15136047|PMID: 15987910|PMID: 17411339|PMID: 7768349|PMID: 3291115	Perez J (2006)|Good MC (2004)|Grundner C (2005)|Greenstein AE (2007)|Hanks SK (1995)|Hanks SK (1988)	taxid:83332 (Mycobacterium tuberculosis)	taxid:83332 (Mycobacterium tuberculosis)	0	IPW-Rv0931c-Rv0931c	akanksha jain
tuberculist:Rv0931c	tuberculist:Rv1747	ncbigeneid:885607	ncbigeneid:885311	pknD	Rv1747	psi-mi:"MI:0914"(association)	psi-mi:"0400"	IEP	PMID: 16879801|PMID: 15136047|PMID: 15987910|PMID: 17411339|PMID: 7768349|PMID: 3291115	Perez J (2006)|Good MC (2004)|Grundner C (2005)|Greenstein AE (2007)|Hanks SK (1995)|Hanks SK (1988)	taxid:83332 (Mycobacterium tuberculosis)	taxid:83332 (Mycobacterium tuberculosis)	0	IPW-Rv0931c-Rv1747	Priyanka Priyadarshini|priyadarshinipriyanka2001@gmail.com
tuberculist:Rv0931c	tuberculist:Rv2942	ncbigeneid:885607	ncbigeneid:887548	pknD	mmpL7	psi-mi:"MI:0914"(association)	psi-mi:"0013"	IDA	PMID: 16879801|PMID: 15136047|PMID: 15987910|PMID: 17411339|PMID: 7768349|PMID: 3291115	Perez J (2006)|Good MC (2004)|Grundner C (2005)|Greenstein AE (2007)|Hanks SK (1995)|Hanks SK (1988)	taxid:83332 (Mycobacterium tuberculosis)	taxid:83332 (Mycobacterium tuberculosis)	0	IPW-Rv0931c-Rv2942	Priyanka Priyadarshini|priyadarshinipriyanka2001@gmail.com

## Sheet: Rv0981
tuberculist:Rv0981	tuberculist:Rv0982	ncbigeneid:885038	ncbigeneid:885062	mprA	mprB	psi-mi:"MI:0914"(association)	psi-mi:"0400"	IMP	PMID: 16513743|PMID: 14638785|PMID: 15601704	He H (2006)|Zahrt TC (2003)|He H (2005)	taxid:83332 (Mycobacterium tuberculosis)	taxid:83332 (Mycobacterium tuberculosis)	0	IPW-Rv0981-Rv0982	Anup Shah|kholia.trupti@gmail.com
tuberculist:Rv0981	tuberculist:Rv0983	ncbigeneid:885038	ncbigeneid:885382	mprA	pepD	psi-mi:"MI:0914"(association)	psi-mi:"0400"	IMP	PMID: 16513743|PMID: 14638785|PMID: 15601704	He H (2006)|Zahrt TC (2003)|He H (2005)	taxid:83332 (Mycobacterium tuberculosis)	taxid:83332 (Mycobacterium tuberculosis)	0	IPW-Rv0981-Rv0983	Anup Shah|ahal4789@gmail.com
tuberculist:Rv0981	tuberculist:Rv0982	ncbigeneid:885038	ncbigeneid:885062	mprA	mprB	psi-mi:"MI:0914"(association)	psi-mi:"0400"	IMP	PMID: 14638785|PMID: 16513743	Zahrt TC (2003)|He H (2006)	taxid:83332 (Mycobacterium tuberculosis)	taxid:83332 (Mycobacterium tuberculosis)	0	IPW-Rv0982-Rv0981	Anup Shah|ahal4789@gmail.com
tuberculist:Rv0981	tuberculist:Rv0983	ncbigeneid:885038	ncbigeneid:885382	mprA	pepD	psi-mi:"MI:0914"(association)	psi-mi:"0982"	IDA	PMID: 20061478|PMID: 15601704	White MJ (2010)|He H (2005)	taxid:83332 (Mycobacterium tuberculosis)	taxid:83332 (Mycobacterium tuberculosis)	0	IPW-Rv0983-Rv0981	Anup Shah|ahal4789@gmail.com
tuberculist:Rv0981	tuberculist:Rv1221	ncbigeneid:885038	ncbigeneid:888751	mprA	sigE	psi-mi:"MI:0914"(association)	psi-mi:"0982"	IDA	PMID: 16513743|PMID: 14638810|PMID: 18606740|PMID: 11489128|PMID: 9139909	He H (2006)|Ando M (2003)|Dona V (2008)|Manganelli R (2001)|Wu QL (1997)	taxid:83332 (Mycobacterium tuberculosis)	taxid:83332 (Mycobacterium tuberculosis)	0	IPW-Rv1221-Rv0981	Priyanka Priyadarshini|priyadarshinipriyanka2001@gmail.com
tuberculist:Rv0981	tuberculist:Rv1354c	ncbigeneid:885038	ncbigeneid:886829	mprA	Rv1354c	psi-mi:"MI:0914"(association)	psi-mi:"0045"	IPI	PMID: 19298676	Cui T (2009)	taxid:83332 (Mycobacterium tuberculosis)	taxid:83332 (Mycobacterium tuberculosis)	0	IPW-Rv1354c-Rv0981	akanksha jain
tuberculist:Rv0981	tuberculist:Rv2053c	ncbigeneid:885038	ncbigeneid:888768	mprA	Rv2053c	psi-mi:"MI:0914"(association)	psi-mi:"0255"	IEP	PMID: 16513743|PMID: 20061486	He H (2006)|Singh R (2010)	taxid:83332 (Mycobacterium tuberculosis)	taxid:83332 (Mycobacterium tuberculosis)	0	IPW-Rv2053c-Rv0981	Anup Shah|ravirajsoni@gmail.com
tuberculist:Rv0981	tuberculist:Rv2710	ncbigeneid:885038	ncbigeneid:888580	mprA	sigB	psi-mi:"MI:0914"(association)	psi-mi:"0982"	IDA	PMID: 11489128|PMID: 16513743	Manganelli R (2001)|He H (2006)	taxid:83332 (Mycobacterium tuberculosis)	taxid:83332 (Mycobacterium tuberculosis)	0	IPW-Rv2710-Rv0981	Priyanka Priyadarshini|priyadarshinipriyanka2001@gmail.com
tuberculist:Rv0981	tuberculist:Rv2984	ncbigeneid:885038	ncbigeneid:887482	mprA	ppk1|ppk1|ppk	psi-mi:"MI:0914"(association)	psi-mi:"0400"	IMP	PMID: 17630969|PMID: 18335046|PMID: 4337332|PMID: 10872445	Sureka K (2007)|Sureka K (2008)|Suzuki H (1972)|Kornberg A (1999)	taxid:83332 (Mycobacterium tuberculosis)	taxid:83332 (Mycobacterium tuberculosis)	0	IPW-Rv2984-Rv0981	Anup Shah|kholia.trupti@gmail.com

## Sheet: Rv1221
tuberculist:Rv1221	tuberculist:Rv2710	ncbigeneid:888751	ncbigeneid:888580	sigE	sigB	psi-mi:"MI:0914"(association)	psi-mi:"0255"	IEP	PMID: 16513743|PMID: 14638810|PMID: 18606740|PMID: 11489128|PMID: 9139909	He H (2006)|Ando M (2003)|Dona V (2008)|Manganelli R (2001)|Wu QL (1997)	taxid:83332 (Mycobacterium tuberculosis)	taxid:83332 (Mycobacterium tuberculosis)	0	IPW-Rv1221-Rv2710	akanksha jain|swetha.r@gmail.com
tuberculist:Rv1221	tuberculist:Rv0479c	ncbigeneid:888751	ncbigeneid:885535	sigE	Rv0479c	psi-mi:"MI:0914"(association)	psi-mi:"0255"	IEP	PMID: 17088352|PMID: 18657035	Agarwal N (2007)|Fontan PA (2008)	taxid:83332 (Mycobacterium tuberculosis)	taxid:83332 (Mycobacterium tuberculosis)	0	IPW-Rv0479c-Rv1221	anupam mondal|sourish10@gmail.com
tuberculist:Rv1221	tuberculist:Rv0678	ncbigeneid:888751	ncbigeneid:888235	sigE	Rv0678	psi-mi:"MI:0914"(association)	psi-mi:"0255"	NAS	PMID: 18851927|PMID: 11489128	Milano A (2009)|Manganelli R (2001)	taxid:83332 (Mycobacterium tuberculosis)	taxid:83332 (Mycobacterium tuberculosis)	0	IPW-Rv0678-Rv1221	Priyanka Priyadarshini|priti.priety@gmail.com|ashwinigbhat@gmail.com
tuberculist:Rv1221	tuberculist:Rv0789c	ncbigeneid:888751	ncbigeneid:885153	sigE	Rv0789c	psi-mi:"MI:0914"(association)	psi-mi:"0255"	IEP	PMID: 20061478|PMID: 11489128	White MJ (2010)|Manganelli R (2001)	taxid:83332 (Mycobacterium tuberculosis)	taxid:83332 (Mycobacterium tuberculosis)	0	IPW-Rv0789c-Rv1221	anupam mondal|sourish10@gmail.com
tuberculist:Rv1221	tuberculist:Rv0863	ncbigeneid:888751	ncbigeneid:885423	sigE	Rv0863	psi-mi:"MI:0914"(association)	psi-mi:"0255"	IEP	PMID: 11489128|PMID: 17993538	Manganelli R (2001)|Lee JH (2008)	taxid:83332 (Mycobacterium tuberculosis)	taxid:83332 (Mycobacterium tuberculosis)	0	IPW-Rv0863-Rv1221	akanksha jain|swetha.r@gmail.com
tuberculist:Rv1221	tuberculist:Rv1057	ncbigeneid:888751	ncbigeneid:887135	sigE	Rv1057	psi-mi:"MI:0914"(association)	psi-mi:"0045"	IEP	PMID: 16352831	Haydel SE (2006)	taxid:83332 (Mycobacterium tuberculosis)	taxid:83332 (Mycobacterium tuberculosis)	0	IPW-Rv1057-Rv1221	Ashwini Bhat|ashwinigbhat@gmail.com
tuberculist:Rv1221	tuberculist:Rv1072	ncbigeneid:888751	ncbigeneid:887114	sigE	Rv1072	psi-mi:"MI:0914"(association)	psi-mi:"0101"	NAS	PMID: 17471433	Jain SK (2007)	taxid:83332 (Mycobacterium tuberculosis)	taxid:83332 (Mycobacterium tuberculosis)	0	IPW-Rv1072-Rv1221	anupam mondal|sourish10@gmail.com
tuberculist:Rv1221	tuberculist:Rv1129c	ncbigeneid:888751	ncbigeneid:885963	sigE	Rv1129c	psi-mi:"MI:0914"(association)	psi-mi:"0045"	IMP	PMID: 17379732	Pang X (2007)	taxid:83332 (Mycobacterium tuberculosis)	taxid:83332 (Mycobacterium tuberculosis)	0	IPW-Rv1129c-Rv1221	Priti Vishnoi|ashwinigbhat@gmail.com
tuberculist:Rv1221	tuberculist:Rv1222	ncbigeneid:888751	ncbigeneid:885196	sigE	rseA	psi-mi:"MI:0914"(association)	psi-mi:"0400"	IPI	PMID: 20025669|PMID: 18606740|PMID: 14761983	RseA (2010)|Dona V (2008)|Manganelli R (2004)	taxid:83332 (Mycobacterium tuberculosis)	taxid:83332 (Mycobacterium tuberculosis)	0	IPW-Rv1222-Rv1221	Ashwini Bhat|deeps8891@yahoo.co.in
tuberculist:Rv1221	tuberculist:Rv1536	ncbigeneid:888751	ncbigeneid:886412	sigE	ileS	psi-mi:"MI:0914"(association)	psi-mi:"0255"	IEP	PMID: 13792726|PMID: 11489128	ALLEN EH (1960)|Manganelli R (2001)	taxid:83332 (Mycobacterium tuberculosis)	taxid:83332 (Mycobacterium tuberculosis)	0	IPW-Rv1536-Rv1221	Anup Shah|shahanup86@gmail.com
tuberculist:Rv1221	tuberculist:Rv1594	ncbigeneid:888751	ncbigeneid:886283	sigE	nadA	psi-mi:"MI:0914"(association)	psi-mi:"0255"	IEP	PMID: 9862811|PMID: 15937336|PMID: 11489128|PMID: 18803397	Sharma V (1998)|Sakuraba H (2005)|Manganelli R (2001)|Saunders AH (2008)	taxid:83332 (Mycobacterium tuberculosis)	taxid:83332 (Mycobacterium tuberculosis)	0	IPW-Rv1594-Rv1221	Anup Shah|shahanup86@gmail.com
tuberculist:Rv1221	tuberculist:Rv1595	ncbigeneid:888751	ncbigeneid:886285	sigE	nadB	psi-mi:"MI:0914"(association)	psi-mi:"0255"	IEP	PMID: 9862811|PMID: 11489128|PMID: 18490451	Sharma V (1998)|Manganelli R (2001)|Boshoff HI (2008)	taxid:83332 (Mycobacterium tuberculosis)	taxid:83332 (Mycobacterium tuberculosis)	0	IPW-Rv1595-Rv1221	Anup Shah|shahanup86@gmail.com
tuberculist:Rv1221	tuberculist:Rv1596	ncbigeneid:888751	ncbigeneid:886281	sigE	nadC	psi-mi:"MI:0914"(association)	psi-mi:"0255"	IEP	PMID: 14532352|PMID: 9862811|PMID: 11489128	Gu S (2003)|Sharma V (1998)|Manganelli R (2001)	taxid:83332 (Mycobacterium tuberculosis)	taxid:83332 (Mycobacterium tuberculosis)	0	IPW-Rv1596-Rv1221	Anup Shah|shahanup86@gmail.com
tuberculist:Rv1221	tuberculist:Rv1630	ncbigeneid:888751	ncbigeneid:885188	sigE	rpsA	psi-mi:"MI:0914"(association)	psi-mi:"0686"	IEP	PMID: 18657035	Fontan PA (2008)	taxid:83332 (Mycobacterium tuberculosis)	taxid:83332 (Mycobacterium tuberculosis)	0	IPW-Rv1630-Rv1221	harsha rohira|priti.priety@gmail.com|ashwinigbhat@gmail.com
tuberculist:Rv1221	tuberculist:Rv2050	ncbigeneid:888751	ncbigeneid:888598	sigE	Rv2050	psi-mi:"MI:0914"(association)	psi-mi:"0686"	TAS	PMID: 19332811|PMID: 11489128	Provvedi R (2009)|Manganelli R (2001)	taxid:83332 (Mycobacterium tuberculosis)	taxid:83332 (Mycobacterium tuberculosis)	0	IPW-Rv2050-Rv1221	Anup Shah|shahanup86@gmail.com
tuberculist:Rv1221	tuberculist:Rv2185c	ncbigeneid:888751	ncbigeneid:887239	sigE	TB16.3	psi-mi:"MI:0914"(association)	psi-mi:"0686"	0	PMID: 11489128	Manganelli R (2001)	taxid:83332 (Mycobacterium tuberculosis)	taxid:83332 (Mycobacterium tuberculosis)	0	IPW-Rv2185c-Rv1221	akanksha jain|vijayachitra@gmail.com
tuberculist:Rv1221	tuberculist:Rv2348c	ncbigeneid:888751	ncbigeneid:886006	sigE	Rv2348c	psi-mi:"MI:0914"(association)	psi-mi:"0255"	IEP	PMID: 11489128|PMID: 15375142	Manganelli R (2001)|Raman S (2004)	taxid:83332 (Mycobacterium tuberculosis)	taxid:83332 (Mycobacterium tuberculosis)	0	IPW-Rv2348c-Rv1221	akanksha jain|akankshajain.21@gmail.com
tuberculist:Rv1221	tuberculist:Rv2694c	ncbigeneid:888751	ncbigeneid:888911	sigE	Rv2694c	psi-mi:"MI:0914"(association)	psi-mi:"0400"	IMP	PMID: 18192397	Song T (2008)	taxid:83332 (Mycobacterium tuberculosis)	taxid:83332 (Mycobacterium tuberculosis)	0	IPW-Rv2694c-Rv1221	Anup Shah|anshula.arora1990@gmail.com
tuberculist:Rv1221	tuberculist:Rv2710	ncbigeneid:888751	ncbigeneid:888580	sigE	sigB	psi-mi:"MI:0914"(association)	psi-mi:"0255"	IEP	PMID: 11489128|PMID: 16513743	Manganelli R (2001)|He H (2006)	taxid:83332 (Mycobacterium tuberculosis)	taxid:83332 (Mycobacterium tuberculosis)	0	IPW-Rv2710-Rv1221	Priyanka Priyadarshini|priyadarshinipriyanka2001@gmail.com
tuberculist:Rv1221	tuberculist:Rv2743c	ncbigeneid:888751	ncbigeneid:887779	sigE	Rv2743c	psi-mi:"MI:0914"(association)	psi-mi:"0255"	IEP	PMID: 11489128|PMID: 19332811	Manganelli R (2001)|Provvedi R (2009)	taxid:83332 (Mycobacterium tuberculosis)	taxid:83332 (Mycobacterium tuberculosis)	0	IPW-Rv2743c-Rv1221	anupam mondal|balaganesh727@gmail.com
tuberculist:Rv1221	tuberculist:Rv2744c	ncbigeneid:888751	ncbigeneid:888304	sigE	Rv2744c	psi-mi:"MI:0914"(association)	psi-mi:"0255"	IEP	PMID: 18657035|PMID: 11489128|PMID: 19332811	Fontan PA (2008)|Manganelli R (2001)|Provvedi R (2009)	taxid:83332 (Mycobacterium tuberculosis)	taxid:83332 (Mycobacterium tuberculosis)	0	IPW-Rv2744c-Rv1221	Anup Shah|balaganesh727@gmail.com
tuberculist:Rv1221	tuberculist:Rv2745c	ncbigeneid:888751	ncbigeneid:888315	sigE	Rv2745c	psi-mi:"MI:0914"(association)	psi-mi:"0255"	IEP	PMID: 19376862|PMID: 18657035|PMID: 19332811|PMID: 11489128	Mehra S (2009)|Fontan PA (2008)|Provvedi R (2009)|Manganelli R (2001)	taxid:83332 (Mycobacterium tuberculosis)	taxid:83332 (Mycobacterium tuberculosis)	0	IPW-Rv2745c-Rv1221	anupam mondal|balaganesh727@gmail.com
tuberculist:Rv1221	tuberculist:Rv2984	ncbigeneid:888751	ncbigeneid:887482	sigE	ppk1|ppk1|ppk	psi-mi:"MI:0914"(association)	psi-mi:"0400"	IMP	PMID: 17630969|PMID: 18335046|PMID: 4337332|PMID: 10872445	Sureka K (2007)|Sureka K (2008)|Suzuki H (1972)|Kornberg A (1999)	taxid:83332 (Mycobacterium tuberculosis)	taxid:83332 (Mycobacterium tuberculosis)	0	IPW-Rv2984-Rv1221	Anup Shah|kholia.trupti@gmail.com
tuberculist:Rv1221	tuberculist:Rv3139	ncbigeneid:888751	ncbigeneid:887971	sigE	fadE24	psi-mi:"MI:0914"(association)	psi-mi:"0255"	IEP	PMID: 16127044|PMID: 19648248|PMID: 9535763|PMID: 20377898|PMID: 18375799|PMID: 18156607|PMID: 11489128	Danelishvili L (2005)|Abomoelak B (2009)|Mahadevan U (1998)|He Z (2010)|Golby P (2008)|Karakousis PC (2008)|Manganelli R (2001)	taxid:83332 (Mycobacterium tuberculosis)	taxid:83332 (Mycobacterium tuberculosis)	0	IPW-Rv3139-Rv1221	Kausik Bhattacharyya|hibeeluck@gmail.com|jhum4u2006@gmail.com
tuberculist:Rv1221	tuberculist:Rv3140	ncbigeneid:888751	ncbigeneid:887417	sigE	fadE23	psi-mi:"MI:0914"(association)	psi-mi:"0255"	IEP	PMID: 9535763|PMID: 12777483|PMID: 18156607|PMID: 16127044|PMID: 18657035	Mahadevan U (1998)|Parish T (2003)|Karakousis PC (2008)|Danelishvili L (2005)|Fontan PA (2008)	taxid:83332 (Mycobacterium tuberculosis)	taxid:83332 (Mycobacterium tuberculosis)	0	IPW-Rv3140-Rv1221	Kausik Bhattacharyya|hibeeluck@gmail.com|jhum4u2006@gmail.com
tuberculist:Rv1221	tuberculist:Rv3223c	ncbigeneid:888751	ncbigeneid:888094	sigE	sigH	psi-mi:"MI:0914"(association)	psi-mi:"0101"	NAS	PMID: 19951358|PMID: 18728196|PMID: 11567012|PMID: 14617153	Sachdeva P (2010)|Park ST (2008)|Raman S (2001)|Song T (2003)	taxid:83332 (Mycobacterium tuberculosis)	taxid:83332 (Mycobacterium tuberculosis)	0	IPW-Rv3223c-Rv1221	anupam mondal|sourish10@gmail.com
tuberculist:Rv1221	tuberculist:Rv3826	ncbigeneid:888751	ncbigeneid:886154	sigE	fadD23	psi-mi:"MI:0914"(association)	psi-mi:"0255"	IEP	PMID: 17768256	Lynett J (2007)	taxid:83332 (Mycobacterium tuberculosis)	taxid:83332 (Mycobacterium tuberculosis)	0	IPW-Rv3826-Rv1221	anupam mondal|priti.priety@gmail.com|ashwinigbhat@gmail.com
tuberculist:Rv1221	tuberculist:Rv0982	ncbigeneid:888751	ncbigeneid:885062	sigE	mprB	psi-mi:"MI:0914"(association)	psi-mi:"0982"	IDA	PMID: 16513743|PMID: 14638810|PMID: 18606740|PMID: 11489128|PMID: 9139909	He H (2006)|Ando M (2003)|Dona V (2008)|Manganelli R (2001)|Wu QL (1997)	taxid:83332 (Mycobacterium tuberculosis)	taxid:83332 (Mycobacterium tuberculosis)	0	IPW-Rv1221-Rv0982	Priyanka Priyadarshini|priyadarshinipriyanka2001@gmail.com
tuberculist:Rv1221	tuberculist:Rv0981	ncbigeneid:888751	ncbigeneid:885038	sigE	mprA	psi-mi:"MI:0914"(association)	psi-mi:"0982"	IDA	PMID: 16513743|PMID: 14638810|PMID: 18606740|PMID: 11489128|PMID: 9139909	He H (2006)|Ando M (2003)|Dona V (2008)|Manganelli R (2001)|Wu QL (1997)	taxid:83332 (Mycobacterium tuberculosis)	taxid:83332 (Mycobacterium tuberculosis)	0	IPW-Rv1221-Rv0981	Priyanka Priyadarshini|priyadarshinipriyanka2001@gmail.com

## Sheet: Rv2031c
tuberculist:Rv2031c	tuberculist:Rv0757	ncbigeneid:887579	ncbigeneid:888772	hspX	phoP	psi-mi:"MI:0914"(association)	psi-mi:"0013"	IEP	PMID: 16326699|PMID: 18065544|PMID: 12730372|PMID: 18946503|PMID: 16573683|PMID: 18757548|PMID: 20421951|PMID: 18194076|PMID: 18835713|PMID: 17658950|PMID: 18065542	Gonzalo Asensio J (2006)|Sinha A (2008)|Sola-Landa A (2003)|Gonzalo-Asensio J (2008)|Walters SB (2006)|Gonzalo-Asensio J (2008)|Miller JL (2010)|Asensio JA (2008)|Ryndak M (2008)|Velmurugan K (2007)|Chesne-Seck ML (2008)	taxid:83332 (Mycobacterium tuberculosis)	taxid:83332 (Mycobacterium tuberculosis)	0	IPW-Rv0757-Rv2031c	Anup Shah|singhpankaj2116@gmail.com
tuberculist:Rv2031c	tuberculist:Rv1996	ncbigeneid:887579	ncbigeneid:888863	hspX	Rv1996	psi-mi:"MI:0914"(association)	psi-mi:"0255"	IEP	PMID: 11500455|PMID: 12933881|PMID: 20541977	Florczyk MA (2001)|Florczyk MA (2003)|Hingley-Wilson SM (2010)	taxid:83332 (Mycobacterium tuberculosis)	taxid:83332 (Mycobacterium tuberculosis)	0	IPW-Rv1996-Rv2031c	Priyanka Priyadarshini|priyadarshinipriyanka2001@gmail.com
tuberculist:Rv2031c	tuberculist:Rv1997	ncbigeneid:887579	ncbigeneid:888867	hspX	ctpF	psi-mi:"MI:0914"(association)	psi-mi:"0686"	RCA	PMID: 12933881|PMID: 15353332|PMID: 12925133	Florczyk MA (2003)|Agranoff D (2004)|Ohno H (2003)	taxid:83332 (Mycobacterium tuberculosis)	taxid:83332 (Mycobacterium tuberculosis)	0	IPW-Rv1997-Rv2031c	Priyanka Priyadarshini
tuberculist:Rv2031c	tuberculist:Rv2007c	ncbigeneid:887579	ncbigeneid:888887	hspX	fdxA	psi-mi:"MI:0914"(association)	psi-mi:"0255"	IEP	PMID: 17609369	Kumar A (2007)	taxid:83332 (Mycobacterium tuberculosis)	taxid:83332 (Mycobacterium tuberculosis)	0	IPW-Rv2007c-Rv2031c	Priti Vishnoi|akankshajain.21@gmail.com|prabhakarsmail@gmail.com
tuberculist:Rv2031c	tuberculist:Rv3133c	ncbigeneid:887579	ncbigeneid:888842	hspX	devR|dosR	psi-mi:"MI:0914"(association)	psi-mi:"0255"	IEP	PMID: 16467323|PMID: 19228590	Demissie A (2006)|Guo M (2009)	taxid:83332 (Mycobacterium tuberculosis)	taxid:83332 (Mycobacterium tuberculosis)	0	IPW-Rv2031c-Rv3133c	Priti Vishnoi|akankshajain.21@gmail.com|prabhakarsmail@gmail.com
tuberculist:Rv2031c	tuberculist:Rv2032	ncbigeneid:887579	ncbigeneid:887582	hspX	acg	psi-mi:"MI:0914"(association)	psi-mi:"0013"	IDA	PMID: 11854240	Purkayastha A (2002)	taxid:83332 (Mycobacterium tuberculosis)	taxid:83332 (Mycobacterium tuberculosis)	0	IPW-Rv2032-Rv2031c	Priti Vishnoi|priti.priety@gmail.com
tuberculist:Rv2031c	tuberculist:Rv2034	ncbigeneid:887579	ncbigeneid:887859	hspX	Rv2034	psi-mi:"MI:0914"(association)	psi-mi:"0045"	IDA	PMID: 19228590	Guo M (2009)	taxid:83332 (Mycobacterium tuberculosis)	taxid:83332 (Mycobacterium tuberculosis)	0	IPW-Rv2034-Rv2031c	SALMAN ZAHEER|priti.priety@gmail.com
tuberculist:Rv2031c	tuberculist:Rv2069	ncbigeneid:887579	ncbigeneid:888723	hspX	sigC	psi-mi:"MI:0914"(association)	psi-mi:"0255"	IEP	PMID: 16091848|PMID: 15049808	Lei J (2005)|Sun R (2004)	taxid:83332 (Mycobacterium tuberculosis)	taxid:83332 (Mycobacterium tuberculosis)	0	IPW-Rv2069-Rv2031c	Priyanka Priyadarshini|priti.priety@gmail.com|ashwinigbhat@gmail.com

## Sheet: Rv2069
tuberculist:Rv2069	tuberculist:Rv0093c	ncbigeneid:888723	ncbigeneid:886945	sigC	Rv0093c	psi-mi:"MI:0914"(association)	psi-mi:"0063"	TAS	PMID: 17145760	Thakur KG (2007)	taxid:83332 (Mycobacterium tuberculosis)	taxid:83332 (Mycobacterium tuberculosis)	0	IPW-Rv0093c-Rv2069	Ashwini Bhat|gaurisd10@gmail.com
tuberculist:Rv2069	tuberculist:Rv0095c	ncbigeneid:888723	ncbigeneid:886940	sigC	Rv0095c	psi-mi:"MI:0914"(association)	psi-mi:"0402"	IPI	PMID: 17158685	Rodrigue S (2007)	taxid:83332 (Mycobacterium tuberculosis)	taxid:83332 (Mycobacterium tuberculosis)	0	IPW-Rv0095c-Rv2069	Ashwini Bhat|gaurisd10@gmail.com
tuberculist:Rv2069	tuberculist:Rv0096	ncbigeneid:888723	ncbigeneid:886938	sigC	PPE1	psi-mi:"MI:0914"(association)	psi-mi:"0402"	IPI	PMID: 17942407|PMID: 12777483|PMID: 17524985|PMID: 17158685|PMID: 17028284	King-Scott J (2007)|Parish T (2003)|Wang F (2007)|Rodrigue S (2007)|Raman S (2006)	taxid:83332 (Mycobacterium tuberculosis)	taxid:83332 (Mycobacterium tuberculosis)	0	IPW-Rv0096-Rv2069	Ashwini Bhat|gaurisd10@gmail.com
tuberculist:Rv2069	tuberculist:Rv0108c	ncbigeneid:888723	ncbigeneid:886918	sigC	Rv0108c	psi-mi:"MI:0914"(association)	psi-mi:"0255"	IEP	PMID: 15049808	Sun R (2004)	taxid:83332 (Mycobacterium tuberculosis)	taxid:83332 (Mycobacterium tuberculosis)	0	IPW-Rv0108c-Rv2069	Anup Shah|prabhakarsmail@gmail.com
tuberculist:Rv2069	tuberculist:Rv0280	ncbigeneid:888723	ncbigeneid:886619	sigC	PPE3	psi-mi:"MI:0914"(association)	psi-mi:"0255"	IEP	PMID: 15049808|PMID: 17098899	Sun R (2004)|Maciag A (2007)	taxid:83332 (Mycobacterium tuberculosis)	taxid:83332 (Mycobacterium tuberculosis)	0	IPW-Rv0280-Rv2069	akanksha jain|gaat3s@gmail.com
tuberculist:Rv2069	tuberculist:Rv0331	ncbigeneid:888723	ncbigeneid:886534	sigC	Rv0331	psi-mi:"MI:0914"(association)	psi-mi:"0255"	IEP	PMID: 17158685	Rodrigue S (2007)	taxid:83332 (Mycobacterium tuberculosis)	taxid:83332 (Mycobacterium tuberculosis)	0	IPW-Rv0331-Rv2069	anupam mondal|sourish10@gmail.com
tuberculist:Rv2069	tuberculist:Rv0680c	ncbigeneid:888723	ncbigeneid:888229	sigC	Rv0680c	psi-mi:"MI:0914"(association)	psi-mi:"0400"|psi-mi:"0255"	IEP	PMID: 17252234	Matsuba T (2007)	taxid:83332 (Mycobacterium tuberculosis)	taxid:83332 (Mycobacterium tuberculosis)	0	IPW-Rv0680c-Rv2069	anupam mondal|sourish10@gmail.com
tuberculist:Rv2069	tuberculist:Rv0681	ncbigeneid:888723	ncbigeneid:888239	sigC	Rv0681	psi-mi:"MI:0914"(association)	psi-mi:"0402"	IPI	PMID: 17286964|PMID: 17158685	Zheng X (2007)|Rodrigue S (2007)	taxid:83332 (Mycobacterium tuberculosis)	taxid:83332 (Mycobacterium tuberculosis)	0	IPW-Rv0681-Rv2069	anupam mondal|sudhakar_dipu@rediffmail.com
tuberculist:Rv2069	tuberculist:Rv0723	ncbigeneid:888723	ncbigeneid:888531	sigC	rplO	psi-mi:"MI:0914"(association)	psi-mi:"0402"	IPI	PMID: 3125705|PMID: 17158685	Medow I (1987)|Rodrigue S (2007)	taxid:83332 (Mycobacterium tuberculosis)	taxid:83332 (Mycobacterium tuberculosis)	0	IPW-Rv0723-Rv2069	Anup Shah|anshula.arora1990@gmail.com
tuberculist:Rv2069	tuberculist:Rv1523	ncbigeneid:888723	ncbigeneid:886489	sigC	Rv1523	psi-mi:"MI:0914"(association)	psi-mi:"0255"	IEP	PMID: 1936951|PMID: 15466031|PMID: 15049808	Orpiszewski J (1991)|Jeevarajah D (2004)|Sun R (2004)	taxid:83332 (Mycobacterium tuberculosis)	taxid:83332 (Mycobacterium tuberculosis)	0	IPW-Rv1523-Rv2069	Anup Shah|shahanup86@gmail.com
tuberculist:Rv2069	tuberculist:Rv0129c	ncbigeneid:888723	ncbigeneid:886885	sigC	fbpC|mpt45|Ag85C	psi-mi:"MI:0914"(association)	psi-mi:"0255"	IEP	PMID: 16091848|PMID: 15049808	Lei J (2005)|Sun R (2004)	taxid:83332 (Mycobacterium tuberculosis)	taxid:83332 (Mycobacterium tuberculosis)	0	IPW-Rv2069-Rv0129c	Priyanka Priyadarshini|priti.priety@gmail.com|ashwinigbhat@gmail.com
tuberculist:Rv2069	tuberculist:Rv0490	ncbigeneid:888723	ncbigeneid:887185	sigC	senX3	psi-mi:"MI:0914"(association)	psi-mi:"0255"	IEP	PMID: 16091848|PMID: 15049808	Lei J (2005)|Sun R (2004)	taxid:83332 (Mycobacterium tuberculosis)	taxid:83332 (Mycobacterium tuberculosis)	0	IPW-Rv2069-Rv0490	Priyanka Priyadarshini|priti.priety@gmail.com|ashwinigbhat@gmail.com
tuberculist:Rv2069	tuberculist:Rv2031c	ncbigeneid:888723	ncbigeneid:887579	sigC	hspX	psi-mi:"MI:0914"(association)	psi-mi:"0255"	IEP	PMID: 16091848|PMID: 15049808	Lei J (2005)|Sun R (2004)	taxid:83332 (Mycobacterium tuberculosis)	taxid:83332 (Mycobacterium tuberculosis)	0	IPW-Rv2069-Rv2031c	Priyanka Priyadarshini|priti.priety@gmail.com|ashwinigbhat@gmail.com
tuberculist:Rv2069	tuberculist:Rv2234	ncbigeneid:888723	ncbigeneid:887373	sigC	ptpA	psi-mi:"MI:0914"(association)	psi-mi:"0013"	IDA	PMID: 16091848|PMID: 15049808	Lei J (2005)|Sun R (2004)	taxid:83332 (Mycobacterium tuberculosis)	taxid:83332 (Mycobacterium tuberculosis)	0	IPW-Rv2069-Rv2234	Priyanka Priyadarshini|priti.priety@gmail.com|ashwinigbhat@gmail.com
tuberculist:Rv2069	tuberculist:Rv3246c	ncbigeneid:888723	ncbigeneid:888743	sigC	mtrA	psi-mi:"MI:0914"(association)	psi-mi:"0255"	IEP	PMID: 16091848|PMID: 15049808	Lei J (2005)|Sun R (2004)	taxid:83332 (Mycobacterium tuberculosis)	taxid:83332 (Mycobacterium tuberculosis)	0	IPW-Rv2069-Rv3246c	Priyanka Priyadarshini|priti.priety@gmail.com|ashwinigbhat@gmail.com
tuberculist:Rv2069	tuberculist:Rv2387	ncbigeneid:888723	ncbigeneid:885302	sigC	Rv2387	psi-mi:"MI:0914"(association)	psi-mi:"0400"	IPI	PMID: 17158685	Rodrigue S (2007)	taxid:83332 (Mycobacterium tuberculosis)	taxid:83332 (Mycobacterium tuberculosis)	0	IPW-Rv2387-Rv2069	anupam mondal|sourish10@gmail.com
tuberculist:Rv2069	tuberculist:Rv3064c	ncbigeneid:888723	ncbigeneid:888879	sigC	Rv3064c	psi-mi:"MI:0914"(association)	psi-mi:"0255"	NAS	PMID: 15049808	Sun R (2004)	taxid:83332 (Mycobacterium tuberculosis)	taxid:83332 (Mycobacterium tuberculosis)	0	IPW-Rv3064c-Rv2069	Priyanka Priyadarshini|priydarshinipriyanka2001@gmail.com
tuberculist:Rv2069	tuberculist:Rv3161c	ncbigeneid:888723	ncbigeneid:888800	sigC	Rv3161c	psi-mi:"MI:0914"(association)	psi-mi:"0255"	IEP	PMID: 20386700|PMID: 15049808	Dutta NK (2010)|Sun R (2004)	taxid:83332 (Mycobacterium tuberculosis)	taxid:83332 (Mycobacterium tuberculosis)	0	IPW-Rv3161c-Rv2069	Anup Shah|shahanup86@gmail.com
tuberculist:Rv2069	tuberculist:Rv3246c	ncbigeneid:888723	ncbigeneid:888743	sigC	mtrA	psi-mi:"MI:0914"(association)	psi-mi:"0255"	IEP	PMID: 10851001|PMID: 11349098|PMID: 15049808|PMID: 16436697	Zahrt TC (2000)|Singh KK (2001)|Sun R (2004)|Cangelosi GA (2006)	taxid:83332 (Mycobacterium tuberculosis)	taxid:83332 (Mycobacterium tuberculosis)	0	IPW-Rv3246c-Rv2069	anupam mondal|sourish10@gmail.com
tuberculist:Rv2069	tuberculist:Rv3482c	ncbigeneid:888723	ncbigeneid:888480	sigC	Rv3482c	psi-mi:"MI:0914"(association)	psi-mi:"0255"	IEP	PMID: 15952732|PMID: 17158685	Xiong Y (2005)|Rodrigue S (2007)	taxid:83332 (Mycobacterium tuberculosis)	taxid:83332 (Mycobacterium tuberculosis)	0	IPW-Rv3482c-Rv2069	anupam mondal|sourish10@gmail.com
tuberculist:Rv2069	tuberculist:Rv3843c	ncbigeneid:888723	ncbigeneid:886178	sigC	Rv3843c	psi-mi:"MI:0914"(association)	psi-mi:"0255"|psi-mi:"0400"	IEP|IPI	PMID: 16267303|PMID: 15049808	Bai G (2005)|Sun R (2004)	taxid:83332 (Mycobacterium tuberculosis)	taxid:83332 (Mycobacterium tuberculosis)	0	IPW-Rv3843c-Rv2069	anupam mondal|priti.priety@gmail.com|ashwinigbhat@gmail.com

[truncated: 8 more sheets: Rv2710, Rv3151, Rv3221A, Rv3223c, Rv3286c, Rv3871, Rv3874, Rv3911]
